# Supplementary material for: miR-329– and miR-495–mediated Prr7 down-regulation is required for homeostatic synaptic depression in rat hippocampal neurons
Source: Life Sci Alliance. 2022 Sep 23;5(12):e202201520. doi: 10.26508/lsa.202201520 (PMC9510147; doi:10.26508/lsa.202201520)
Supplement: Supplementary file 1 [file LSA-2022-01520_SdataF1.1.xlsx]

## Sheet: 1A
	On Graphpad spreadsheet:
	cFos			GluA1			Prr7
	Rep1	Rep2	Rep3	Rep1	Rep2	Rep3	Rep1	Rep2	Rep3
PTX/Mock	1.31951	2.06678	1.87046	0.533416	0.752622	0.400534	0.395021	0.360942	0.659034
Irina's data from 191114 summary excel spreadsheet.
N1 "02.06.19"																			Prr7 raw values		normalized
B01	SYBR	mock	Unkn	GAPDH	22.01	21.95		C01	SYBR	mock	Unkn	Prr7_2	31.12	30.81	8.86	0.00215216			Mock	PTX
B02	SYBR	mock	Unkn	GAPDH	21.95			C02	SYBR	mock	Unkn	Prr7_2	30.61					N1	0.00221266	0.000874048	1	0.395021
B03	SYBR	mock	Unkn	GAPDH	22.02			C03	SYBR	mock	Unkn	Prr7_2	30.7					N2	0.0267517	0.0096558	1	0.360942
B04	SYBR	PTX	Unkn-08	GAPDH	21.77	21.76		C04	SYBR	PTX	Unkn-14	Prr7_2	32.27	31.92	10.16	0.000874048	0.406126	N3	0.00156009	0.00102815	1	0.659034
B05	SYBR	PTX	Unkn-08	GAPDH	21.7			C05	SYBR	PTX	Unkn-14	Prr7_2	31.85					Av	0.0101748	0.00385267	1	0.471665
B06	SYBR	PTX	Unkn-08	GAPDH	21.82			C06	SYBR	PTX	Unkn-14	Prr7_2	31.65					SD	0.0143597	0.00502625	0	0.163158
																			cFos raw values
								mock02	SYBR		Unkn	cFOS	23.09	23.2	1.25	0.420448		N1	0.420448	0.554785	1	1.31951
								mock02	SYBR		Unkn	cFOS	23.26					N2	0.372959	0.770826	1	2.06678
								mock02	SYBR		Unkn	cFOS	23.14					N3	0.160245	0.299731	1	1.87046
								PTX02	SYBR		Unkn	cFOS	22.61	22.61	0.85	0.554785	1.31951	Av	0.317884	0.54178	1	1.75225
								PTX02	SYBR		Unkn	cFOS	22.88					SD	0.138569	0.235816	0	0.387408
								PTX02	SYBR		Unkn	cFOS	22.74
																			GluA1 raw values
																		N1	0.330639	0.176368	1	0.533416
N2 "10" from 10.5.19																		N2	0.605698	0.455861	1	0.752622
B01	SYBR	mock10	Unkn	GAPDH	20.4534	20.3671		C01	SYBR	mock10	Unkn	Prr7_2	25.655	25.5913	5.22423	0.0267517		N3	0.307076	0.122995	1	0.400534
B02	SYBR	mock10	Unkn	GAPDH	20.3781			C02	SYBR	mock10	Unkn	Prr7_2	25.6485					Av	0.414471	0.251741
B03	SYBR	mock10	Unkn	GAPDH	20.2697			C03	SYBR	mock10	Unkn	Prr7_2	25.4704					SD
B04	SYBR	PTX10	Unkn-08	GAPDH	21.1044	21.0911		C04	SYBR	PTX10	Unkn-14	Prr7_2	27.6544	27.7855	6.69439	0.0096558	0.360942
B05	SYBR	PTX10	Unkn-08	GAPDH	21.0813			C05	SYBR	PTX10	Unkn-14	Prr7_2	27.885
B06	SYBR	PTX10	Unkn-08	GAPDH	21.0877			C06	SYBR	PTX10	Unkn-14	Prr7_2	27.8172
								mock10	SYBR		Unkn	cFOS	21.76	21.79	1.42291	0.372959
								mock10	SYBR		Unkn	cFOS	21.71
								mock10	SYBR		Unkn	cFOS	21.9
								PTX10	SYBR		Unkn	cFOS	21.37	21.4667	0.375524	0.770826	2.06678
								PTX10	SYBR		Unkn	cFOS	21.47
								PTX10	SYBR		Unkn	cFOS	21.56
N3 "31" from 31.5.19
B01	SYBR	mock31	Unkn	GAPDH	20.5279	20.495		C10	SYBR	mock31	Unkn	Prr7_2	29.2812	29.8192	9.32415	0.00156009
B02	SYBR	mock31	Unkn	GAPDH	20.5487			C11	SYBR	mock31	Unkn	Prr7_2	30.8385
B03	SYBR	mock31	Unkn	GAPDH	20.4085			C12	SYBR	mock31	Unkn	Prr7_2	29.3378
B04	SYBR	PTX31	Unkn-08	GAPDH	20.964	20.9684		C13	SYBR	PTX31	Unkn-14	Prr7_2	31.2514	30.8941	9.92573	0.00102815	0.659034
B05	SYBR	PTX31	Unkn-08	GAPDH	21.0761			C14	SYBR	PTX31	Unkn-14	Prr7_2	30.7022
B06	SYBR	PTX31	Unkn-08	GAPDH	20.8651			C15	SYBR	PTX31	Unkn-14	Prr7_2	30.7288
								PTX31	SYBR		Unkn	cFOS	22.61	22.7067	1.73826				23.1367	2.64165	0.160245
								PTX31	SYBR		Unkn	cFOS	22.78
								PTX31	SYBR		Unkn	cFOS	22.73
								mock31	SYBR		Unkn	cFOS	23.04	23.1367	2.64165				22.7067	1.73826	0.299731	1.87046
								mock31	SYBR		Unkn	cFOS	23.13
								mock31	SYBR		Unkn	cFOS	23.24
D01	SYBR	mock10	Unkn	GluR1	21.2006		21.0899	0.113359	B01	SYBR	mock10	Unkn	GAPDH	20.4534	20.3671	0.0923624		0.722824	0.60591	1
D02	SYBR	mock10	Unkn	GluR1	20.974				B02	SYBR	mock10	Unkn	GAPDH	20.3781
D03	SYBR	mock10	Unkn	GluR1	21.0951				B03	SYBR	mock10	Unkn	GAPDH	20.2697
D04	SYBR	PTX10	Unkn-14	GluR1	22.1702		22.2212	0.0758751	B04	SYBR	PTX10	Unkn-08	GAPDH	21.1044	21.0911	0.0119225		1.13009	0.456888	0.754052
D05	SYBR	PTX10	Unkn-14	GluR1	22.1851				B05	SYBR	PTX10	Unkn-08	GAPDH	21.0813
D06	SYBR	PTX10	Unkn-14	GluR1	22.3084				B06	SYBR	PTX10	Unkn-08	GAPDH	21.0877
D10	SYBR	mock31	Unkn	GluR1	22.2785		22.1991	0.086998	B01	SYBR	mock31	Unkn	GAPDH	20.5279	20.495	0.0756773		1.70406	0.306921	1			0.754052
D11	SYBR	mock31	Unkn	GluR1	22.1061				B02	SYBR	mock31	Unkn	GAPDH	20.5487									0.400386
D12	SYBR	mock31	Unkn	GluR1	22.2127				B03	SYBR	mock31	Unkn	GAPDH	20.4085									0.533084
D13	SYBR	PTX31	Unkn-14	GluR1	24.011		23.993	0.105548	B04	SYBR	PTX31	Unkn-08	GAPDH	20.964	20.9684	0.105564		3.0246	0.122887	0.400386
D14	SYBR	PTX31	Unkn-14	GluR1	23.8796				B05	SYBR	PTX31	Unkn-08	GAPDH	21.0761
D15	SYBR	PTX31	Unkn-14	GluR1	24.0884				B06	SYBR	PTX31	Unkn-08	GAPDH	20.8651
E01	SYBR	mock	Unkn	GluR1	23.5521		23.5909	0.297629	B01	SYBR	mock	Unkn	GAPDH	22.0119	21.9939	0.0395114		1.597	0.330563
E02	SYBR	mock	Unkn	GluR1	23.3146				B02	SYBR	mock	Unkn	GAPDH	21.9486
E03	SYBR	mock	Unkn	GluR1	23.9061				B03	SYBR	mock	Unkn	GAPDH	22.0213
E04	SYBR	PTX	Unkn-26	GluR1	24.2514		24.2686	0.104639	B04	SYBR	PTX	Unkn-08	GAPDH	21.769	21.7641	0.0572039		2.50457	0.176218	0.533084
E05	SYBR	PTX	Unkn-26	GluR1	24.1737				B05	SYBR	PTX	Unkn-08	GAPDH	21.7046
E06	SYBR	PTX	Unkn-26	GluR1	24.3808				B06	SYBR	PTX	Unkn-08	GAPDH	21.8187
PTX qPCR with Irina -- raw values
Rep1							Averages of triplicates - Rep1						Compiled
	GAPDH	GluA1	Prr7_2	cFos				GAPDH	GluA1	Prr7_2	cFos			GluA1/GAPDH	Rep1	Rep2	Rep3
Mock	22.01	23.55	31.12	23.09			Mock	21.9933	23.59	30.81	23.1633			Mock	0.330639	0.605698	0.307076
Mock	21.95	23.31	30.61	23.26			PTX	21.7633	24.2667	31.9233	22.7433			PTX	0.176368	0.455861	0.122995
Mock	22.02	23.91	30.7	23.14			minus GAPDH								1	1	1
PTX	21.77	24.25	32.27	22.61			Mock		1.59667	8.81667	1.17				0.533416	0.752622	0.400534
PTX	21.7	24.17	31.85	22.88			PTX		2.50334	10.16	0.980003			Prr7/GAPDH	Rep1	Rep2	Rep3
PTX	21.82	24.38	31.65	22.74			Mock		0.330639	0.00221778	0.44442			Mock	0.00221778	0.0267683	0.00156098
							PTX		0.176368	0.000874046	0.506979			PTX	0.000874046	0.00966286	0.00102986
Rep2							Averages of triplicates - Rep2								1	1	1
	GAPDH	GluA1	Prr7_2	cFos				GAPDH	GluA1	Prr7_2	cFos				0.394109	0.360981	0.659752
Mock	20.45	21.2	25.65	21.76			Mock	20.3667	21.09	25.59	21.79			cFos/GAPDH	Rep1	Rep2	Rep3
Mock	20.38	20.97	25.65	21.71			PTX	21.09	22.2233	27.7833	21.4667			Mock	0.44442	0.372851	0.216135
Mock	20.27	21.1	25.47	21.9			minus GAPDH							PTX	0.506979	0.770215	0.222725
PTX	21.1	22.17	27.65	21.37			Mock		0.72333	5.22333	1.42333				1	1	1
PTX	21.08	22.19	27.88	21.47			PTX		1.13333	6.69333	0.376667				1.14076	2.06575	1.03049
PTX	21.09	22.31	27.82	21.56			Mock		0.605698	0.0267683	0.372851
							PTX		0.455861	0.00966286	0.770215
Rep3							Averages of triplicates - Rep3
	GAPDH	GluA1	Prr7_2	cFos				GAPDH	GluA1	Prr7_2	cFos
Mock	20.53	22.28	29.28	23.04			Mock	20.4967	22.2	29.82	22.7067
Mock	20.55	22.11	30.84	23.13			PTX	20.97	23.9933	30.8933	23.1367
Mock	20.41	22.21	29.34	23.24			minus GAPDH
PTX	20.96	24.01	31.25	22.61			Mock		1.70333	9.32333	2.21
PTX	21.08	23.88	30.7	22.78			PTX		3.02333	9.92333	2.16667
PTX	20.87	24.09	30.73	22.73			Mock		0.307076	0.00156098	0.216135
							PTX		0.122995	0.00102986	0.222725

## Sheet: 1B
		Cell Body			Dendrites
		Rep1	Rep2	Rep3	Rep1	Rep2	Rep3
	PTX/Mock	1.20235	0.847447	0.365576	0.483145	0.174553	0.136315
	New GAPDH done 200812
	Rep1				using Prr7 Ct values from 200228
	GAPDH	Avg Ct			Prr7 2	Delta Avg Ct GAPDH	2^-Delta Avg Ct
	PC (PTX Cell Body)	19.5503			27.9948	8.44456	0.00287035
	PD (PTX Dendrites)	20.7637			30.7595	9.99589	0.000979351		Mock Cell Body	0.00238727	0.00480884	0.0228866
	CC (Mock Cell Body)	19.8314			28.5419	8.71042	0.00238727		Mock Dendrites	0.00202703	0.000603367	0.0176752
	CD (Mock Dendrites)	22.0661			31.0126	8.94642	0.00202703		PTX Cell Body	0.00287035	0.00407524	0.00836678
									PTX Dendrites	0.000979351	0.000105319	0.00240938
	Rep2
	PC (PTX Cell Body)	20.7656			28.7045	7.9389	0.00407524		normalized to respective Mock conditions
	PD (PTX Dendrites)	23.1199			36.3328	13.2129	0.000105319		Cell body
	CC (Mock Cell Body)	20.3682			28.0683	7.7001	0.00480884		Mock	1	1	1
	CD (Mock Dendrites)	22.472			33.1666	10.6947	0.000603367		PTX	1.20235	0.847447	0.365576
	Rep3								Dendrites
	PC (PTX Cell Body)	21.2157			28.1168	6.90111	0.00836678		Mock	1	1	1
	PD (PTX Dendrites)	21.8837			30.5809	8.69712	0.00240938		PTX	0.483145	0.174553	0.136315
	CC (Mock Cell Body)	21.2967			26.7461	5.44935	0.0228866
	CD (Mock Dendrites)	24.3233			30.1454	5.82213	0.0176752

## Sheet: 1C
		Whole Cell	0.477646	0.784562	0.576319
		Tubulin	GluA1	Prr7	GluA1/Tubulin	Prr7/Tubulin	GluA1 PTX/Mock	Prr7 PTX/Mock
	rep3 48h PTX	13267.1	7412.02	3750.86	0.558678	0.28272	0.728717	0.477646
	Rep3 48h Mock	13155.1	10085.5	7786.54	0.766661	0.591902
	Rep2 48h PTX	11812.6	5407.83	2809.22	0.457803	0.237816	0.905626	0.784562
	Rep2 48h Mock	11545.2	5836.2	3499.57	0.50551	0.30312
	Rep1 48h PTX	11283.6	9855.68	3726.5	0.873453	0.330258	1.36289	0.576319
	Rep1 48h Mock	14453.2	9262.8	8282.37	0.640883	0.573048

## Sheet: 1D
		Cell Body				Dendrites
		Rep1	Rep2	Rep3	Rep4	Rep1	Rep2	Rep3	Rep4
	PTX/Mock	0.544708	0.591562	1.09884	0.887244	0.594178	0.563049	0.865061	0.227668
	Prr7 quantifications taking PTX/Mock -- compartmentalized samples
		48h Mock Cell Body				48h PTX Cell Body				48h Mock Dendrites				48h PTX Dendrites
		0.800489	0.613778	0.374815	0.73854	0.436033	0.363088	0.411862	0.655265	0.659178	0.653627	0.574637	0.674114	0.391669	0.368024	0.497096	0.153474
		Cell body					Dendrites
		0.544708	0.591562	1.09884	0.887244		0.594178	0.563049	0.865061	0.227668
		Prr7 Signal	Rep	Prr7	Tubulin	Prr7/Tubulin
		48h Mock CB	1	9131.51	11407.4	0.800489
		48h PTX CB	1	4778.12	10958.2	0.436033
		48h Mock DD	1	11796	17895.1	0.659178
		48h PTX DD	1	7923.27	20229.5	0.391669
		48h Mock CB	2	7516.15	12245.7	0.613778
		48h PTX CB	2	4179.3	11510.4	0.363088
		48h Mock DD	2	11245.4	17204.6	0.653627
		48h PTX DD	2	6176.07	16781.7	0.368024
		48h Mock CB	3	6068.32	16190.2	0.374815
		48h PTX CB	3	6762.61	16419.6	0.411862
		48h Mock DD	3	11321.1	19701.4	0.574637
		48h PTX DD	3	10176.1	20471.1	0.497096
		48h EtOHCB	4	10838.2	12839.4	0.844138
		48h PTX CB	4	10429.5	13337.8	0.781947
		48h EtOH DD	4	17533.6	18223.8	0.962125
		48h PTX DD	4	11408.5	18066.9	0.631455
		GluA1 Signal	Rep	GluA	Tubulin	GluA/Tubulin
		48h Mock CB	1	13841.2	11407.4	1.21335
		48h PTX CB	1	12336	10958.2	1.12574
		48h Mock DD	1	13303.8	17895.1	0.743432
		48h PTX DD	1	9443.87	20229.5	0.466837
		48h Mock CB	2	12528.9	12245.7	1.02312
		48h PTX CB	2	11441.5	11510.4	0.99401
		48h Mock DD	2	13782.5	17204.6	0.801093
		48h PTX DD	2	6014.66	16781.7	0.358405
		48h Mock CB	3	8434.9	16190.2	0.520989
		48h PTX CB	3	6308.07	16419.6	0.38418
		48h Mock DD	3	12215.9	19701.4	0.620054
		48h PTX DD	3	7137.42	20471.1	0.348658
		48h Mock CB	4	8865.17	12839.4	0.690467
		48h PTX CB	4	7306.76	13337.8	0.547823
		48h Mock DD	4	6645.1	18223.8	0.364639
		48h PTX DD	4	7088.12	18066.9	0.392326

## Sheet: 1E
		Whole Cell				Cell Body				Dendrites
		1.7.20	10.6.20	11.3.20	17.6.20	1.7.20	10.6.20	11.3.20	17.6.20	1.7.20	10.6.20	11.3.20	17.6.20
	PTX/Mock	0.888542	0.857286	0.674939	0.883234	1.17839	0.860794	0.657876	0.882172	0.886605	0.856109	0.666316	0.880021
	CBinv																			CBinv compiled			PTX/Mock
																				Experiment date	Mock	PTX
	17.6																			17.6	4456.42	3921.74	0.880021
	Mock									PTX										11.3	8634.43	5753.25	0.666316
																				10.6	5373.4	4600.22	0.856109
	3526.82	4904.79	4695.02	5093.96	4550.54	4192.6	4258.33	4429.3		4257.09	3307.24	3292.9	3947.13	3838.43	4194.14	4106.02	3471.53	4881.19		1.7	1968.68	1745.44	0.886605
	11.3
	Mock									PTX
	9559.42	10068.9	7427.65	6460.61	8831.53	9692.25	7637.05	9776.77	8255.64	5486.68	5978.16	5651.86	6660.34	6363.96	6065.16	4387.87	5431.99
	10.6
	Mock									PTX
	4941.17	5217.03	5544.26	5514.76	6660.06	4887.22	4849.3			5209.78	4698.72	4636.32	3773.8	3752.23	4897.09	5233.6
	1.7
	Mock									PTX
	2029.62	2029.72	1935.95	2124.87	2011.92	1829.58	1960.15	1827.64		1746.92	1636.99	1581.81	2006.62	1687.54	2187.18	1371.05
	CB
	17.6
	Mock									PTX										CB
	3508.78	4818.02	4675.94	5039.12	4494.8	4119.85	4246.2	4479.6		4146.57	3300.76	3292.26	3912.32	3758.33	4119.03	4135.27	3715.83	4734.55			Mock	PTX
																				17.6	4422.79	3901.66	0.882172
	11.3																			11.3	8379.12	5512.42	0.657876
	Mock									PTX										10.6	5032.6	4332.03	0.860794
	8960.86	10035.6	6997.61	6308.39	8633.22	9466.74	7287.65	9535.98	8185.99	5241.49	5756.12	5446.96	6424.34	6047.93	5776.13	4113.32	5293.08			1.7	1938.85	2284.72	1.17839
	10.6
	Mock									PTX
	4724.46	4962.95	4983.37	5133.69	6151.09	4629.5	4643.1			4759.29	4493.61	4582.19	4482.43	3609.51	3614.45	4782.73	4609.27
	1.7
	Mock									PTX
	1955.43	1974.7	1924.86	2087.91	2006.26	1780.77	1977.48	1803.4		5019.7	3502.79	1711.21	1619.85	1566.63	1967.52	1643.51	2184.82	1346.48
	Whole cell
	17.6																				Selection1 (WC)
	Mock									PTX											Mock	PTX	norm
	3580.86	4957.24	4749.3	5138.71	4598.3	4265.9	4325.59	4483.57		4318.84	3375.27	3403.01	3992.54	3843.66	4249.57	4250.06	3597.78	4839.08		17.6	4512.43	3985.53	0.883234
																				11.3	8634.79	5827.96	0.674939
	11.3																			10.6	5354.54	4590.37	0.857286
	Mock									PTX										1.7	1962.27	1743.56	0.888542
	9248.17	10183.1	7334.92	6469.3	8986.85	9716.18	7758.88	9697.64	8318.13	5482.58	6228.84	5735.4	6863.73	6308.4	6053.12	4518.42	5433.18
	10.6
	Mock									PTX
	4915.93	5196.52	5529.57	5490.19	6638.59	4877.31	4833.66			5149.51	4618.11	4699.56	4633.14	3732.41	3750.53	4894.05	5245.68
	1.7
	Mock									PTX
	2020.4	2007.39	1934.05	2118.95	2012.08	1816.44	1962.92	1825.96		1743.48	1635.05	1581.09	2003.87	1677.75	2187.6	1376.08
