# Supplementary material for: miR-329– and miR-495–mediated Prr7 down-regulation is required for homeostatic synaptic depression in rat hippocampal neurons
Source: Life Sci Alliance. 2022 Sep 23;5(12):e202201520. doi: 10.26508/lsa.202201520 (PMC9510147; doi:10.26508/lsa.202201520)
Supplement: Supplementary file 3 [file LSA-2022-01520_SdataF2.1.xlsx]

## Sheet: 2A
	Ctr shRNA			Prr7 shRNA
	Rep1	Rep2	Rep3	Rep1	Rep2	Rep3
EtOH	1.10362	0.974405	0.728843	0.772947	0.728732	0.443492
PTX	0.82031	0.662868	0.489717	0.745482	0.582347	0.349095
From dataset of RHDIV21 fixation on 04.03.20 SPAR ICC with GDB blocking, PFA fixation.
	Dendrite segment	Length total (um)	Spine count total		Spine count/um		Average				Average		Mock GFP	Mock Prr7KD	Mock Ctrsh	PTX GFP	PTX Prr7KD	PTX Ctrsh
Mock GFP 1	1	236.562	219		0.925762		0.905006		0.905006		0.944296		0.905006	0.8122	1.2162	0.918741	0.854992	1.01784
	2	184.337	163		0.88425				1.00641				1.00641	0.754138	0.982759	1.01769	0.583552	0.8803
Mock GFP 2	1	181.869	192		1.0557		1.00641		0.88136				0.88136	0.900953	0.929806	0.869117	0.717994	0.876769
	2	156.72	150		0.957121				0.92063				0.92063	0.803841	1.1173	1.05952	0.595228	0.558802
Mock GFP 3	1	215.433	210		0.974781		0.88136		0.757753				0.757753	0.688043	1.19691	0.941995	0.788799	0.88807
	2	228.444	180		0.787939				0.933578				0.933578	0.812374	1.03567	0.891971	0.812356	0.804014
Mock GFP 4	1	218.017	205		0.940294		0.92063		0.920593				0.920593	0.910625	1.40494	0.943301	0.95373	0.716377
	2	234.193	211		0.900966				1.22903				1.22903	0.501399	1.12621		0.657204
Mock GFP 5	1	144.215	131		0.908366		0.757753								0.922769
	2	120.236	73		0.607139
Mock GFP 6	1	264.687	265		1.00118		0.933578
	2	229.799	199		0.865974
Mock GFP 7	1	201.437	155		0.769471		0.920593
	2	188.483	202		1.07171
Mock GFP 8	1	220.852	274		1.24065		1.22903
	2	224.246	273		1.21741
Mock Prr7KD 1	1	202.231	156		0.771395		0.8122		0.8122		0.772947
	2	189.917	162		0.853004				0.754138
Mock Prr7KD 2	1	198.45	157		0.791131		0.754138		0.900953
	2	237.051	170		0.717145				0.803841
Mock Prr7KD 3	1	195.49	170		0.86961		0.900953		0.688043
	2	231.686	216		0.932296				0.812374
Mock Prr7KD 4	1	255.337	189		0.740198		0.803841		0.910625
	2	162.539	141		0.867484				0.501399
Mock Prr7KD 5	1	171.172	132		0.771154		0.688043
	2	163.655	99		0.604931
Mock Prr7KD 7	1	185.491	162		0.873358		0.812374
	2	149.057	112		0.75139
Mock Prr7KD 8	1	190.57	159		0.834339		0.910625
	2	149.963	148		0.98691
Mock Prr7KD 9	1	265.831	132		0.496556		0.501399	resolution not the best. should i discard?
	2	294.326	149		0.506241
Mock PTM 1	1	206.506	262		1.26873		1.2162
	2	232.883	271		1.16367
Mock PTM 2	1	239.778	253		1.05514		0.982759
	2	188.933	172		0.910376
Mock PTM 3	1	123.739	97		0.783908		0.8539	not a very complex cell in that there is little branching
	2	97.414	90		0.923892			might discard?
Mock PTM 4	1	195.109	164		0.840556		0.929806
	2	182.522	186		1.01906				1.2162		1.10362
Mock PTM 5	1	226.254	254		1.12263		1.1173		0.982759
	2	229.325	255		1.11196				0.929806
Mock PTM 6	1	206.108	246		1.19355		1.19691		1.1173
	2	202.455	243		1.20027				1.19691
Mock PTM 7	1	232.069	229		0.986775		1.03567		1.03567
	2	202.848	220		1.08456				1.40494
Mock PTM 8	1	200.832	282		1.40416		1.40494		1.12621
	2	184.959	260		1.40572				0.922769
Mock PTM 9	1	316.788	349		1.10168		1.12621
	2	218.122	251		1.15073
Mock PTM 10	1	203.666	166		0.81506		0.922769
	2	176.617	182		1.03048
PTX GFP 1	1	239.17	234		0.978384		0.918741		0.918741		0.948905
	2	203.702	175		0.859098				1.01769
PTX GFP 2	1	130.89	147		1.12308		1.01769		0.869117
	2	201.686	184		0.912309				1.05952
PTX GFP 4	1	162.84	148		0.908868		0.869117		0.941995
	2	156.746	130		0.829367				0.891971
PTX GFP 6	1	202.148	193		0.954746		1.05952		0.943301
	2	149.448	174		1.16428
PTX GFP 7	1	197.313	181		0.917324		0.941995
	2	128.276	124		0.966666
PTX GFP 8	1	247.226	214		0.865605		0.891971
	2	172.05	158		0.918338
PTX GFP 9	1	194.696	149		0.765296		0.943301
	2	122.179	137		1.12131
PTX Prr7KD 1	1	277.039	252		0.909619		0.854992	looking back PTX+ Prr7sh combination doesn't appear too healthy
	2	164.925	132		0.800364
PTX Prr7KD 2	1	296.199	163		0.550306		0.583552
	2	170.234	105		0.616798				3 does not look pyramidal
PTX Prr7KD 4	1	231.544	149		0.643506		0.717994
	2	160.256	127		0.792482				0.854992		0.745482
PTX Prr7KD 5	1	197.758	124		0.627029		0.595228		0.583552
	2	268.003	151		0.563427				0.717994
PTX Prr7KD 6	1	199.65	151		0.756324		0.788799		0.595228
	2	210.648	173		0.821275				0.788799
PTX Prr7KD 7	1	234.856	202		0.860102		0.812356		0.812356
	2	180.484	138		0.764611				0.95373
PTX Prr7KD 8	1	132.183	111		0.839745		0.95373		0.657204
	2	135.804	145		1.06772
PTX Prr7KD 9	1	133.308	83		0.622618		0.657204
	2	109.86	76		0.69179
PTX PTM 1	1	239.426	253		1.05669		1.01784		1.01784		0.82031
	2	228.809	224		0.978982				0.8803
PTX PTM 2	1	158.515	146		0.921048		0.8803		0.876769
	2	138.169	116		0.839552				0.558802
PTX PTM 3	1	212.713	188		0.88382		0.876769		0.88807
	2	210.413	183		0.869718				0.804014
PTX PTM 4	1	252.666	141		0.558049		0.558802		0.716377
	2	176.926	99		0.559556
PTX PTM 5	1	144.155	129		0.89487		0.88807
	2	187.23	165		0.881269
PTX PTM 6	1	237.826	179		0.752651		0.804014	may not be pyramidal?
	2	155.487	133		0.855377
PTX PTM 7	1	273.516	197		0.72025		0.716377
	2	289.121	206		0.712504
RHDIV21 19-02-20 SPAR ICC with NGS blocking
	Dendrite segment	Length total (um)	Spine count total		Spine count/um		Average
Mock GFP 1	1	277.159	241		0.869537		0.893451						Mock GFP	Mock Prr7KD	Mock Ctrsh	PTX GFP	PTX Prr7KD	PTX Ctrsh
	2	204.935	188		0.917364								0.893451	0.710539	1.1786	0.671684	0.37107	0.828487
Mock GFP 2	1	217.775	274		1.25818		1.16977			0.893451	1.02505		1.16977	0.72366	0.905979	0.678331	0.877843	0.589564
	2	243.214	263		1.08135					1.16977			1.03343	0.705101	0.820274	0.855116	0.700262	0.818649
Mock GFP 3	1	216.809	209		0.963982		1.03343			1.03343			1.29064	0.873919	0.925185	0.620277	0.438934	0.669005
	2	226.68	250		1.10288					1.29064			1.1011	0.765828	1.09037	0.533363	0.645071	0.657278
Mock GFP 4	1	248.07	354		1.42702		1.29064			1.1011			0.818006	0.720665	0.852335	0.487746	0.526214	0.56752
	2	298.023	344		1.15427					0.818006			0.92246	0.587828	0.784505	0.638818	0.522271	0.626476
Mock GFP 5	1	354.643	358		1.00947		1.1011			0.92246			0.971502	0.957778	1.23799	0.824208	0.577107	0.555943
	2	249.006	297		1.19274					0.971502				0.513272				0.652885
Mock GFP 6	1	236.322	202		0.854766		0.818006
	2	252.161	197		0.781247
Mock GFP 7	1	215.758	197		0.91306		0.92246
	2	265.061	247		0.931861
Mock GFP 8	1	144.049	150		1.04131		0.971502
	2	129.756	117		0.901692
Mock Prr7KD 1	1	200.633	135		0.67287		0.710539
	2	155.037	116		0.748208						0.710539	0.728732
Mock Prr7KD 2	1	168.399	116		0.68884		0.72366				0.72366
	2	216.222	164		0.75848			3 is not a very complex cell			0.705101
Mock Prr7KD 3	1	228.427	152		0.66542		0.705101				0.873919
	2	178.576	133		0.744781						0.765828
Mock Prr7KD 4	1	147.915	136		0.919447		0.873919				0.720665
	2	135.202	112		0.82839						0.587828
Mock Prr7KD 5	1	203.925	177		0.867966		0.765828				0.957778
	2	150.673	100		0.663689						0.513272
Mock Prr7KD 6	1	231.225	184		0.795762		0.720665
	2	252.491	163		0.645568
Mock Prr7KD 7	1	162.92	107		0.656764		0.587828	7 may not be pyramidal?
	2	186.937	97		0.518891
Mock Prr7KD 8	1	206.025	187		0.907657		0.957778
	2	163.707	165		1.0079
Mock Prr7KD 9	1	178.536	95		0.532106		0.513272
	2	149.665	74		0.494438
Mock PTM 1	1	142.667	166		1.16355		1.1786				1.1786	0.974405
	2	178.444	213		1.19365						0.905979
Mock PTM 2	1	180.73	157		0.868699		0.905979				0.820274
	2	184.467	174		0.943258						0.925185
Mock PTM 3	1	226.238	178		0.786782		0.820274				1.09037
	2	228.4	195		0.853765						0.852335
Mock PTM 4	1	121.075	111		0.916787		0.925185				0.784505
	2	249.576	233		0.933583						1.23799
Mock PTM 5	1	151.818	166		1.09341		1.09037
	2	176.58	192		1.08733
Mock PTM 6	1	237.411	205		0.863481		0.852335
	2	237.759	200		0.841188
Mock PTM 7	1	133.052	108		0.811713		0.784505		a bit blurry may be inaccurate
	2	244.29	185		0.757297
Mock PTM 9	1	223.181	272		1.21874		1.23799
	2	247.366	311		1.25725
PTX GFP 1	1	165.355	106		0.641045		0.671684
	2	139.537	98		0.702323
PTX GFP 2	1	161.168	107		0.663904		0.678331
	2	191.986	133		0.692759						0.671684	0.663693
PTX GFP 3	1	210.557	185		0.878622		0.855116				0.678331
	2	241.7	201		0.831609						0.855116
PTX GFP 4	1	175.694	118		0.671622		0.620277		not a very complex cell		0.620277
	2	165.222	94		0.568931						0.533363
PTX GFP 5	1	179.117	97		0.541545		0.533363				0.487746
	2	274.191	144		0.525181						0.638818
PTX GFP 6	1	137.146	63		0.459364		0.487746				0.824208
	2	213.126	110		0.516127
PTX GFP 7	1	248.336	150		0.60402		0.638818
	2	243.462	164		0.673616
PTX GFP 8	1	219.084	183		0.835296		0.824208
	2	223.829	182		0.813121
PTX Prr7KD 1	1	163.077	60		0.367924		0.37107
	2	192.402	72		0.374216
PTX Prr7KD 2	1	217.225	171		0.787202		0.877843				0.37107	0.582347
	2	162.109	157		0.968484						0.877843
PTX Prr7KD 3	1	217.726	182		0.835913		0.700262				0.700262
	2	226.705	128		0.56461						0.438934
PTX Prr7KD 4	1	239.271	93		0.388681		0.438934		not the healthiest?		0.645071
	2	116.52	57		0.489186						0.526214
PTX Prr7KD 5	1	250.612	142		0.566613		0.645071				0.522271
	2	207.317	150		0.72353						0.577107
PTX Prr7KD 6	1	191.684	96		0.500824		0.526214
	2	224.799	124		0.551604
PTX Prr7KD 7	1	192.827	89		0.461554		0.522271
	2	154.377	90		0.582988
PTX Prr7KD 8	1	209.649	118		0.562846		0.577107
	2	228.284	135		0.591369
PTX PTM 1	1	191.216	206		1.07732		0.828487
	2	220.82	128		0.579658						0.828487	0.662868
PTX PTM 2	1	238.414	150		0.629158		0.589564				0.589564
	2	203.647	112		0.549971						0.818649
PTX PTM 3	1	124.16	86		0.692655		0.818649				0.669005
	2	232.892	220		0.944644						0.657278
PTX PTM 4	1	153.624	108		0.703015		0.669005				0.56752
	2	207.876	132		0.634994						0.626476
PTX PTM 5	1	282.121	193		0.684104		0.657278				0.555943
	2	174.478	110		0.630452						0.652885
PTX PTM 6	1	167.218	90		0.53822		0.56752
	2	224.523	134		0.596821
PTX PTM 7	1	203.935	114		0.559002		0.626476
	2	181.569	126		0.693951
PTX PTM 8	1	147.093	79		0.537075		0.555943
	2	227.901	131		0.574811
PTX PTM 9	1	182.082	122		0.670028		0.652885
	2	253.247	161		0.635743
RHDIV21 21-10-19 GluA1 ICC with NGS blocking											0.713842	0.711181
											0.889527				Mock GFP	Mock Ctrsh	Mock Prr7sh	PTX GFP	PTX Ctrsh	PTX Prr7sh
	Dendrite segment	Length total (um)	Spine count total		Spine count/um		Average				0.631419				0.713842	0.815986	0.497541	0.569544	0.540609	0.185275
Mock GFP 1	1	207.133	138		0.666239		0.713842				0.561069				0.889527	0.746051	0.421115	0.611948	0.47123	0.373924
	2	139.209	106		0.761445						0.701592				0.631419	0.736258	0.588209	0.527117	0.478388	0.290338
Mock GFP 2	1	211.701	181		0.854979		0.889527				0.594549				0.561069	0.856515	0.512066	0.537373	0.60091	0.323148
	2	198.036	183		0.924074						0.886272				0.701592	0.63308	0.320412	0.374692	0.450509	0.527372
Mock GFP 4	1	167.475	96		0.57322		0.631419	3 is unhealthy							0.594549	0.672593	0.465051	0.394441	0.50533	0.519145
	2	168.209	116		0.689618										0.886272	0.641416	0.300049	0.643148	0.381044	0.224464
Mock GFP 5	1	267.901	172		0.642028		0.561069	noting that these samples are not the healthiest (not many spines)?
	2	239.529	115		0.480109
Mock GFP 7	1	157.75	87		0.551506		0.701592
	2	260.662	222		0.851678
Mock GFP 8	1	239.958	127		0.529259		0.594549
	2	251.577	166		0.659838
Mock GFP 9	1	268.384	261		0.972487		0.886272
	2	152.489	122		0.800058
Mock PTM 1	1	245.201	206		0.840127		0.815986
	2	199.534	158		0.791845						0.815986	0.728843
Mock PTM 3	1	183.446	142		0.77407		0.746051				0.746051
	2	192.192	138		0.718032						0.736258
Mock PTM 4	1	198.774	155		0.77978		0.736258				0.856515
	2	209.315	145		0.692736						0.63308
Mock PTM 5	1	224.337	184		0.820195		0.856515				0.672593
	2	168.004	150		0.892836						0.641416
Mock PTM 7	1	227.44	149		0.655118		0.63308
	2	191.476	117		0.611043
Mock PTM 9	1	176.376	109		0.617998		0.672593
	2	215.9	157		0.727189
Mock PTM 8	1	208.84	131		0.627274		0.641416
	2	173.898	114		0.655557
Mock Prr7KD 1	1	170.088	79		0.464465		0.497541
	2	165.845	88		0.530616
Mock Prr7KD 2	1	165.018	66		0.399956		0.421115				0.497541	0.443492
	2	257.759	114		0.442274						0.421115
Mock Prr7KD 3	1	194.239	100		0.51483		0.588209				0.588209
	2	237.308	157		0.661587						0.512066
Mock Prr7KD 4	1	228.596	114		0.498696		0.512066				0.320412
	2	167.48	88		0.525436						0.465051
Mock Prr7KD 7	1	210.814	70		0.332046		0.320412				0.300049
	2	259.086	80		0.308778
Mock Prr7KD 8	1	208.172	103		0.494783		0.465051
	2	195.259	85		0.435319
Mock Prr7KD 10	1	163.14	52		0.318745		0.300049
	2	149.278	42		0.281354
PTX Prr7KD 1	1	207.391	34		0.163942		0.185275
	2	164.562	34		0.206609
PTX Prr7KD 3	1	179.149	74		0.413064		0.373924
	2	167.272	56		0.334784						0.185275	0.349095
PTX Prr7KD 5	1	149.025	29		0.194598		0.290338				0.373924
	2	142.458	55		0.386079						0.290338
PTX Prr7KD 10	1	135.942	47		0.345736		0.323148				0.323148
	2	179.664	54		0.300561						0.527372
PTX Prr7KD 9	1	128.419	72		0.560665		0.527372				0.519145
	2	172.037	85		0.49408						0.224464
PTX Prr7KD 11	1	176.7	86		0.486701		0.519145
	2	130.532	72		0.551589
PTX Prr7KD 12	1	283.789	70		0.246662		0.224464
	2	118.656	24		0.202265
PTX GFP 1	1	229.745	152		0.661603		0.569544
	2	192.676	92		0.477486						0.569544	0.522609
PTX GFP 3	1	199.949	139		0.695177		0.611948				0.611948
	2	219.398	116		0.528719						0.527117
PTX GFP 4	1	257.871	127		0.492494		0.527117				0.537373
	2	192.26	108		0.561739						0.374692
PTX GFP 5	1	162.365	106		0.65285		0.537373				0.394441
	2	142.215	60		0.421896						0.643148
PTX GFP 6	1	214.964	62		0.28842		0.374692
	2	171.38	79		0.460964
PTX GFP 8	1	156.051	62		0.397306		0.394441
	2	224.733	88		0.391576
PTX GFP 9	1	217.454	140		0.643814		0.643148
	2	208.566	134		0.642482
PTX PTM 3	1	220.338	117		0.531002		0.540609	not much branching in first two cells
	2	161.755	89		0.550215
PTX PTM 4	1	266.654	123		0.461272		0.47123
	2	224.444	108		0.481189						0.540609	0.489717
PTX PTM 5	1	269.633	138		0.511807		0.478388				0.47123
	2	265.187	118		0.444969						0.478388
PTX PTM 6	1	204.081	104		0.509602		0.60091				0.60091
	2	164.688	114		0.692218						0.450509
PTX PTM 7	1	215.948	97		0.449182		0.450509				0.50533
	2	225.746	102		0.451835						0.381044
PTX PTM 8	1	237.967	124		0.521081		0.50533
	2	198.129	97		0.48958
PTX PTM 9	1	192.253	82		0.426521		0.381044
	2	211.583	71		0.335566
										PTM	0.743292	0.68028	0.67191
										Prr7	0.964467	0.799124	0.787151

## Sheet: 2B
		Ctr shRNA			Prr7 shRNA
	pcDNA	0.931769	1.22645	1.11596	0.835671	0.873913	0.581796
	HA-Prr7R	1.51075	1.49995	1.39886	1.36943	1.35929	1.37116
	Rep1
		Mut9 Ctrsh		Length	Sum	Spine number		Average
		1	D1.1	94.478	172.811	306	1.77072	1.61197
			D1.2	78.333
			D2.1	100.526	221.578	322	1.45321
			D2.2	121.052
		2	D1.1	106.02	248.774	379	1.52347	1.57516
			D1.2	142.754
			D2.1	90.433	181.946	296	1.62686
			D2.2	91.513
		3	D1.1	135.791	230.396	266	1.15453	1.2255
			D1.2	94.605
			D2.1	223.157	354.813	460	1.29646
			D2.2	131.656
		4	D1.1	70.887	143.545	195	1.35846	1.45856
			D1.2	72.658
			D2.1	90.965	130.882	204	1.55866
			D2.2	39.917
		5	D1.1	115.41	253.903	371	1.46119	1.47944
			D1.2	138.493
			D2.1	114.793	210.992	316	1.49769
			D2.2	96.199
		6	D1.1	99.844	196.039	398	2.03021	1.8181
			D1.2	96.195
			D2.1	107.421	211.085	339	1.60599
			D2.2	103.664
		7	D1.1	124.866	165.647	240	1.44886	1.36571
			D1.2	40.781
			D2.1	145.865	269.772	346	1.28256
			D2.2	123.907
		8	D1.1	106.81	216.975	348	1.60387	1.55158
			D1.2	110.165
			D2.1	119.962	192.757	289	1.4993
			D2.2	72.795
		Mut9 Prr7sh
		1	D1.1	104.674	235.541	301	1.27791	1.38669
			D1.2	130.867
			D2.1	187.623	270.818	405	1.49547
			D2.2	83.195
		2	D1.1	120.532	171.355	245	1.42978	1.46274
			D1.2	50.823
			D2.1	117.239	169.151	253	1.49571
			D2.2	51.912
		3	D1.1	85.839	222.34	213	0.957992	1.07689
			D1.2	136.501
			D2.1	106.466	212.413	254	1.19578
			D2.2	105.947
		4	D1.1	94.091	210.581	266	1.26317	1.32677
			D1.2	116.49
			D2.1	125.491	160.389	223	1.39037
			D2.2	34.898
		5	D1.1	97.819	209.739	285	1.35883	1.18616
			D1.2	111.92
			D2.1	70.549	143.071	145	1.01348
			D2.2	72.522
		6	D1.1	82.753	172.22	195	1.13227	1.35962
			D1.2	89.467
			D2.1	93.226	147.451	234	1.58697
			D2.2	54.225
		7	D1.1	105.019	201.112	338	1.68066	1.57219
			D1.2	96.093
			D2.1	86.859	140.053	205	1.46373
			D2.2	53.194
		8	D1.1	116.713	242.926	335	1.37902	1.47817
			D1.2	126.213
			D2.1	102.971	161.032	254	1.57733
			D2.2	58.061
		pcDNA Ctrsh
		1	D1.1	125.856	209.63	254	1.21166	0.975595
			D1.2	83.774
			D2.1	139.218	246.102	182	0.739531
			D2.2	106.884						pcDNA Ctrsh	pcDNA Prr7sh	Mut9 Ctrsh	Mut9 Prr7sh
		2	D1.1	108.032	210.275	187	0.889312	0.815077		0.975595	0.904908	1.61197	1.49292
			D1.2	102.243						0.815077	0.933443	1.57516	1.46274
			D2.1	98.821	197.073	146	0.740842			1.04829	0.688995	1.2255	1.07689
			D2.2	98.252						0.984183	1.01158	1.45856	1.32677
		3	D1.1	129.092	173.805	174	1.00112	1.04829		0.920424	0.839036	1.47944	1.18616
			D1.2	44.713						1.0654	0.607617	1.8181	1.35962
			D2.1	98.567	147.882	162	1.09547			0.818997	0.86412	1.36571	1.57219
			D2.2	49.315						0.826176		1.55158	1.47817
		4	D1.1	96.076	183.046	170	0.928728	0.984183	Average	0.931769	0.835671	1.51075	1.36943
			D1.2	86.97
			D2.1	67.943	136.586	142	1.03964
			D2.2	68.643
		5	D1.1	69.551	140.992	123	0.87239	0.920424
			D1.2	71.441
			D2.1	63.434	136.299	132	0.968459
			D2.2	72.865
		6	D1.1	67.944	147.771	164	1.10983	1.0654
			D1.2	79.827
			D2.1	106.85	153.774	157	1.02098
			D2.2	46.924
		7	D1.1	144.191	248.585	186	0.748235	0.818997
			D1.2	104.394
			D2.1	121.428	201.178	179	0.889759
			D2.2	79.75
		8	D1.1	99.206	166.119	157	0.945106	0.826176
			D1.2	66.913
			D2.1	62.029	151.291	107	0.707246
			D2.2	89.262
		pcDNA Prr7sh
		1	D1.1	87.558	155.45	134	0.862014	0.904908
			D1.2	67.892
			D2.1	88.636	177.252	168	0.947803
			D2.2	88.616
		2	D1.1	101.386	207.23	198	0.95546	0.933443
			D1.2	105.844
			D2.1	82.02	108.621	99	0.911426
			D2.2	26.601
		3	D1.1	158.4	301.791	187	0.619634	0.688995
			D1.2	143.391
			D2.1	123.123	262.41	199	0.758355
			D2.2	139.287
		4	D1.1	108.321	181.802	179	0.984588	1.01158
			D1.2	73.481
			D2.1	83.047	150.207	156	1.03857
			D2.2	67.16
		5	D1.1	132.897	197.491	156	0.789909	0.839036
			D1.2	64.594
			D2.1	105.779	155.377	138	0.888162
			D2.2	49.598
		7	D1.1	75.984	166.87	101	0.605262	0.607617
			D1.2	90.886
			D2.1	92.331	163.942	100	0.609972
			D2.2	71.611
		8	D1.1	128.476	264.297	208	0.786993	0.86412
			D1.2	135.821
			D2.1	89.971	154.051	145	0.941247
			D2.2	64.08
	Rep2
	Mut9 Ctrsh		Sum length	Spine count		Average
	1	112.838	183.205	276	1.50651	1.48869
		70.367
		124.731	222.997	328	1.47087
		98.266
	2	91.453	190.26	228	1.19836	1.1153		1.48869
		98.807						1.1153
		48.376	120.128	124	1.03223			1.50286
		71.752						1.94856				Mut9 Ctrsh	Mut9 Prr7sh	pcDNA Ctrsh	pcDNA Prr7sh
	3	105.609	235.117	346	1.47161	1.50286		1.24138				1.48869	1.24719	1.40993	1.126
		129.508						1.47738				1.1153	1.35213	1.23144	1.07259
		142.592	231.404	355	1.53411			1.47804				1.50286	1.12352	1.21854	0.859679
		88.812						1.73645				1.94856	1.31577	1.06934	0.68245
	4	91.94	216.397	457	2.11186	1.94856		1.5631				1.24138	1.65027	1.38036	0.811788
		124.457						1.44773				1.47738	1.37066	1.37212	1.01256
		146.871	271.108	484	1.78527							1.47804	0.976725	1.32005	0.708094
		124.237										1.73645	1.52142	1.07528	0.829964
	5	81.479	167.065	226	1.35277	1.24138						1.5631	1.67593	0.960968	0.762088
		85.586										1.44773
		106.807	170.797	193	1.13						Average	1.49995	1.35929	1.22645	0.873913
		63.99
	6	104.091	200.032	258	1.28979	1.47738
		95.941
		121.337	203.008	338	1.66496
		81.671
	7	139.104	268.361	425	1.58369	1.47804
		129.257
		151.674	225.884	310	1.37239
		74.21
	8	92.915	224.3	393	1.75212	1.73645
		131.385
		153.544	206.882	356	1.72079
		53.338
	9	119.709	253.885	417	1.64248	1.5631
		134.176
		112.924	223.087	331	1.48373
		110.163
	10	182.433	351.214	531	1.5119	1.44773
		168.781
		183.914	320.913	444	1.38355
		136.999
	Mut9 Prr7sh
	1	77.869	149.733	199	1.32903	1.24719
		71.864
		112.674	185.351	216	1.16536
		72.677
	2	104.412	208.413	274	1.3147	1.35213
		104.001
		63.693	113.705	158	1.38956
		50.012
	3	134.528	230.852	240	1.03963	1.12352		1.24719
		96.324						1.35213
		94.456	150.735	182	1.20742			1.12352
		56.279						1.31577
	4	83.342	193.908	258	1.33053	1.31577		1.65027
		110.566						1.37066
		111.369	217.522	283	1.30102			0.976725
		106.153						1.52142
	5	133.16	207.08	348	1.68051	1.65027		1.67593
		73.92
		84.194	227.773	369	1.62003
		143.579
	6	101.935	185.732	248	1.33526	1.37066
		83.797
		145.263	257.458	362	1.40605
		112.195
	7	172.738	302.347	361	1.19399	0.976725
		129.609
		155.631	234.378	178	0.759457
		78.747
	8	95.863	215.347	298	1.38381	1.52142
		119.484
		84.005	159.129	264	1.65903
		75.124
	9	96.255	170.038	309	1.81724	1.67593
		73.783
		106.842	241.755	371	1.53461
		134.913
	pcDNA Ctrsh
	1	106.855	174.895	245	1.40084	1.40993
		68.04
		108.218	162.788	231	1.41902
		54.57
	2	104.244	136.61	156	1.14194	1.23144
		32.366
		101.133	171.848	227	1.32093
		70.715						1.40993
	3	109.589	201.39	270	1.34068	1.21854		1.23144
		91.801						1.21854
		91.007	191.536	210	1.0964			1.06934
		100.529						1.38036
	4	67.309	215.384	225	1.04465	1.06934		1.37212
		148.075						1.32005
		95.451	207.488	227	1.09404			1.07528
		112.037						0.960968
	5	153.034	224.283	247	1.10129	1.38036
		71.249
		102.309	153.065	254	1.65943
		50.756
	6	124.552	204.33	286	1.3997	1.37212
		79.778
		121.605	162.136	218	1.34455
		40.531
	7	124.099	252.729	359	1.42049	1.32005
		128.63
		97.846	219.742	268	1.21961
		121.896
	8	114.939	214.979	228	1.06057	1.07528
		100.04
		114.594	200	218	1.09
		85.406
	9	97.034	217.298	219	1.00783	0.960968
		120.264
		82.366	173.941	159	0.914103
		91.575
	pcDNA Prr7sh
	1	105.668	156.844	177	1.12851	1.126
		51.176
		103.942	176.236	198	1.12349
		72.294
	2	91.809	147.02	160	1.08829	1.07259
		55.211						1.126
		75.884	128.679	136	1.05689			1.07259
		52.795						0.859679
	3	108.306	176.896	121	0.684018	0.859679		0.68245
		68.59						0.811788
		111.629	224.081	232	1.03534			1.01256
		112.452						0.708094
	4	132.328	254.234	169	0.664742	0.68245		0.829964
		121.906						0.762088
		100.574	247.087	173	0.700158
		146.513
	5	94.821	185.494	158	0.85178	0.811788
		90.673
		114.058	204.717	158	0.771797
		90.659
	6	71.52	149.867	122	0.814055	1.01256
		78.347
		90.438	161.016	195	1.21106
		70.578
	7	155.716	281.021	187	0.665431	0.708094
		125.305
		90.454	199.798	150	0.750758
		109.344
	8	130.631	265.195	219	0.825807	0.829964
		134.564
		135.071	225.387	188	0.834121
		90.316
	9	124.206	188.691	164	0.869146	0.762088
		64.485
		125.417	230.524	151	0.655029
		105.107
	Rep3
		Mut9 Ctrsh		Sum of lengths	Spine count	Count/Length	Average
		1	104.154	195.919	254	1.29645	1.30672
			91.765
			103.449	199.697	263	1.31699
			96.248
		2	126.344	214.185	321	1.4987	1.22408
			87.841						1.30672
			143.322	240.14	228	0.949446			1.22408
			96.818						1.41094				Mut9 Ctrsh	Mut9 Prr7sh	pcDNA Ctrsh	pcDNA Prr7sh
		3	113.849	184.675	270	1.46203	1.41094		2.04306				1.30672	1.59644	1.24459	0.569707
			70.826						1.62358				1.22408	1.01864	1.40893	0.644286
			97.733	197.815	269	1.35986			1.5368				1.41094	1.39944	0.963235	0.462899
			100.082						1.37005				2.04306	1.47553	1.32509	0.393572
		4	69.604	135.05	295	2.18438	2.04306		1.23785				1.62358	1.26973	1.2427	0.719976
			65.446						0.836682				1.5368	1.38976	1.18759	0.7028
			71.906	165.637	315	1.90175							1.37005	1.51445	0.946308	0.574958
			93.731										1.23785	1.30532	0.983605	0.586168
		5	83.222	196.678	338	1.71854	1.62358						0.836682		0.802266
			113.456												1.05526
			83.614	162.893	249	1.52861						Average	1.39886	1.37116	1.11596	0.581796
			79.279
		6	90.165	148.655	203	1.36558	1.5368
			58.49
			112.121	227.75	389	1.70801
			115.629
		7	133.57	245.55	349	1.4213	1.37005
			111.98
			73.782	151.653	200	1.3188
			77.871
		8	124.493	204.126	267	1.30802	1.23785
			79.633
			101.333	188.407	220	1.16769
			87.074
		9	125.182	257.739	245	0.950574	0.836682
			132.557
			104.694	217.214	157	0.72279
			112.52
		Mut9 Prr7sh
		1	122.656	238.397	322	1.35069	1.59644
			115.741
			66.852	125.937	232	1.84219
			59.085
		2	121.844	186.074	187	1.00498	1.01864
			64.23						1.59644
			84.963	174.366	180	1.03231			1.01864
			89.403						1.39944
		3	93.77	188.232	235	1.24846	1.39944		1.47553
			94.462						1.26973
			58.525	125.772	195	1.55042			1.38976
			67.247						1.51445
		4	182.407	252.926	338	1.33636	1.47553		1.30532
			70.519
			84.812	185.173	299	1.61471
			100.361
		5	147.941	274.076	358	1.30621	1.26973
			126.135
			155.713	305.695	377	1.23325
			149.982
		6	188.187	331.795	499	1.50394	1.38976
			143.608
			92.101	154.439	197	1.27558
			62.338
		7	68.402	177.823	272	1.52961	1.51445
			109.421
			76.352	133.397	200	1.49928
			57.045
		8	136.865	278.248	321	1.15365	1.30532
			141.383
			111.219	168.155	245	1.45699
			56.936
		pcDNA Ctrsh
		1	111.28	212.385	252	1.18652	1.24459
			101.105
			133.644	201.126	262	1.30267
			67.482
		2	128.601	239.384	385	1.6083	1.40893
			110.783
			102.84	153.775	186	1.20956
			50.935
		3	104.516	182.603	194	1.06241	0.963235
			78.087
			87.975	166.656	144	0.864055
			78.681						1.24459
		4	72.19	126.134	195	1.54598	1.32509		1.40893
			53.944						0.963235
			77.742	182.032	201	1.1042			1.32509
			104.29						1.2427
		5	120.744	230.372	308	1.33697	1.2427		1.18759
			109.628						0.946308
			152.337	256.874	295	1.14842			0.983605
			104.537						0.802266
		6	96.687	147.555	158	1.07079	1.18759		1.05526
			50.868
			82.597	167.893	219	1.3044
			85.296
		7	141.649	216.252	202	0.934095	0.946308
			74.603
			65.239	159.621	153	0.95852
			94.382
		8	130.09	159.759	169	1.05784	0.983605
			29.669
			119.289	201.239	183	0.909366
			81.95
		9	168.193	229.314	210	0.915775	0.802266
			61.121
			94.703	188.746	130	0.688756
			94.043
		10	107.923	221.39	253	1.14278	1.05526
			113.467
			80.525	142.6	138	0.967742
			62.075
		pcDNA Prr7sh
		1	95.675	172.399	100	0.58005	0.569707
			76.724
			104.754	221.68	124	0.559365
			116.926
		2	80.373	139.193	98	0.704058	0.644286		0.569707
			58.82						0.644286
			72.926	136.866	80	0.584513			0.462899
			63.94						0.393572
		3	70.172	144.75	64	0.442142	0.462899		0.719976
			74.578						0.7028
			108.933	206.758	100	0.483657			0.574958
			97.825						0.586168
		4	100.498	208.321	73	0.350421	0.393572
			107.823
			96.066	176.313	77	0.436723
			80.247
		5	93.592	135.172	109	0.80638	0.719976
			41.58
			84.982	143.63	91	0.633572
			58.648
		6	86.018	159.754	107	0.66978	0.7028
			73.736
			80.014	153.57	113	0.735821
			73.556
		7	114.405	226.567	130	0.573782	0.574958
			112.162
			97.685	189.192	109	0.576134
			91.507
		8	134.796	260.933	148	0.567195	0.586168
			126.137
			87.325	185.081	112	0.60514
			97.756

## Sheet: 2C
	pcDNA			HA-Prr7
	Rep1	Rep2	Rep3	Rep1	Rep2	Rep3
PTX/Mock	0.786935	0.800655	0.739204	1.18369	1.08033	0.905484
Rep1
Mock pcDNA
Sample	D1 length sum	D1 count	D2 length	D2 count	D1	D2	Average							Mock pcDNA	Mock HA-Prr7	PTX pcDNA	PTX HA-Prr7
1	85.138	138	104.522	145	0.914053	0.923626	0.918839							0.918839	0.941252	0.81408	0.92047
	65.838		52.468							0.918839		Average		1.10268	1.05946	0.836363	1.47754
sum	150.976		156.99							1.10268		1.0117		1.00253	0.789758	0.588505	1.63697
2	98.845	270	113.672	157	1.21984	0.985519	1.10268			1.00253				1.04024	1.28536	0.73268	1.91847
	122.496		45.635							1.04024				0.903565	1.61776	0.741286	1.82924
	221.341		159.307							0.903565				1.24081	1.13716	0.770095	0.694704
3	141.748	206	136.915	273	0.951699	1.05335	1.00253			1.24081				1.07285	1.00589	1.04984	1.81209
	74.707		122.257							1.07285				0.812073	1.38187	0.795582	1.38071
	216.455		259.172							0.812073						0.836829	0.605641
4	94.261	130	106.304	224	0.951635	1.12884	1.04024
	42.346		92.13
	136.607		198.434
5	104.02	134	74.935	131	0.851637	0.955493	0.903565
	53.324		62.167
	157.344		137.102
6	96.345	199	70.483	202	1.21861	1.26301	1.24081
	66.956		89.452
	163.301		159.935
7	111.801	216	141.006	302	1.10884	1.03687	1.07285
	82.998		150.255
	194.799		291.261
8	149.764	143	91.654	256	0.634847	0.989299	0.812073
	75.487		167.115
	225.251		258.769
Mock HA-Prr7
1	102.22	183	106.38	173	0.89487	0.987635	0.941252
	102.279		68.786
	204.499		175.166
2	85.213	196	80.404	173	0.932823	1.1861	1.05946			0.941252
	124.902		65.452							1.05946		1.15231
	210.115		145.856							0.789758
3	139.305	215	125.791	198	0.78808	0.791436	0.789758			1.28536
	133.51		124.387							1.61776
	272.815		250.178							1.13716
4	158.493	400	118.037	235	1.41804	1.15267	1.28536			1.00589
	123.587		85.837							1.38187
	282.08		203.874
5	96.965	222	58.485	168	1.54675	1.68878	1.61776
	46.562		40.995
	143.527		99.48
6	162.214	361	124.649	254	1.06146	1.21286	1.13716
	177.885		84.773
	340.099		209.422
7	89.159	243	58.741	137	1.08331	0.928467	1.00589
	135.153		88.814
	224.312		147.555
8	167.809	313	179.177	366	1.28787	1.47587	1.38187
	75.228		68.812
	243.037		247.989
PTX pcDNA
1	182.95	233	157.267	188	0.844984	0.783177	0.81408
	92.795		82.781
	275.745		240.048
2	141.407	182	137.496	240	0.812816	0.85991	0.836363
	82.506		141.603
	223.913		279.099
3	133.991	142	151.219	114	0.664057	0.512952	0.588505
	79.846		71.024							0.81408
	213.837		222.243							0.836363
4	128.506	158	72.169	116	0.725107	0.740254	0.73268			0.588505		0.79614
	89.393		84.534							0.73268
	217.899		156.703							0.741286
5	127.305	172	100.757	127	0.721737	0.760834	0.741286			0.770095
	111.009		66.165							1.04984
	238.314		166.922							0.795582
6	94.875	134	75.223	129	0.620548	0.919642	0.770095			0.836829
	121.063		65.049
	215.938		140.272
7	117.434	185	71.811	155	0.996837	1.10285	1.04984
	68.153		68.734
	185.587		140.545
8	125.403	171	71.708	83	0.876595	0.714569	0.795582
	69.67		44.446
	195.073		116.154
9	101.588	156	104.048	137	0.857973	0.815685	0.836829
	80.236		63.909
	181.824		167.957
PTX HA-Prr7
1	107.8	180	49.948	221	0.866222	0.974719	0.92047
	99.999		176.784
	207.799		226.732							0.92047
2	119.96	246	138.53	319	1.43576	1.51933	1.47754			1.47754		1.36398
	51.378		71.431							1.63697
	171.338		209.961							1.91847
3	119.259	317	178.061	379	1.76131	1.51263	1.63697			1.82924
	60.721		72.496							0.694704
	179.98		250.557							1.81209
4	150.058	472	121.449	333	1.8964	1.94055	1.91847			1.38071
	98.835		50.152							0.605641
	248.893		171.601
5	120.901	332	99.971	340	1.702	1.95647	1.82924
	74.164		73.811
	195.065		173.782
6	84.076	79	138.818	166	0.716144	0.673264	0.694704
	26.237		107.742
	110.313		246.56
7	125.145	401	108.858	298	1.72687	1.89732	1.81209
	107.067		48.206
	232.212		157.064
8	148.356	336	119.794	232	1.38997	1.37146	1.38071
	93.376		49.369
	241.732		169.163
9	103.546	95	126.559	157	0.533241	0.678042	0.605641
	74.61		104.99
	178.156		231.549
REP2
HA-Prr7 Mock
Sample	D1 length sum	D1 count	D2 length	D2 count	D1	D2	Average								Mock HA-Prr7	PTX HA-Prr7	Mock pcDNA	PTX pcDNA
1	102.545	208	93.455	195	1.15324	0.852534	1.00288								1.00288	1.07656	1.10025	0.759126
	77.817		135.275												1.32703	1.57358	1.04178	0.846758
sum	180.362		228.73												1.42824	1.39614	0.92177	0.737558
2	150.217	345	171.05	363	1.42153	1.23253	1.32703								1.34371	1.55085	0.805605	0.623222
	92.48		123.467												1.2714	1.39724	0.884658	0.913024
	242.697		294.517												1.24106	1.39014	1.26797	0.95578
3	68.21	164	102.768	192	1.60679	1.2497	1.42824		1.00288			1.28962			1.20077	1.52528	0.986042	0.846161
	33.857		50.869						1.32703						1.50187	1.2359	1.07889	0.793233
	102.067		153.637						1.42824
4	100.923	291	123.279	237	1.45532	1.2321	1.34371		1.34371
	99.033		69.076						1.2714
	199.956		192.355						1.24106
5	128.047	259	81.648	231	1.27275	1.27005	1.2714		1.20077
	75.449		100.235						1.50187
	203.496		181.883
6	156.508	286	79.913	176	1.20935	1.27277	1.24106
	79.982		58.368
	236.49		138.281
7	92.789	210	134.249	375	1.37617	1.02537	1.20077
	59.808		231.472
	152.597		365.721
8	135.045	375	167.421	298	1.61801	1.38573	1.50187
	96.721		47.628
	231.766		215.049
HA-Prr7 PTX
1	125.933	327	161.53	440	0.784462	1.36866	1.07656
	290.913		159.952
	416.846		321.482
2	81.23	230	100.943	309	1.83718	1.30998	1.57358
	43.962		134.939
	125.192		235.882
3	167.133	333	150.793	350	1.43941	1.35286	1.39614		1.07656			1.39321
	64.211		107.919						1.57358
	231.344		258.712						1.39614
4	109.457	293	93.521	302	1.52657	1.57514	1.55085		1.55085
	82.477		98.208						1.39724
	191.934		191.729						1.39014
5	93.956	254	75.736	214	1.1742	1.62028	1.39724		1.52528
	122.362		56.34						1.2359
	216.318		132.076
6	134.766	245	104.491	304	1.32444	1.45585	1.39014
	50.218		104.322
	184.984		208.813
7	79.104	185	95.041	325	1.35573	1.69484	1.52528
	57.354		96.718
	136.458		191.759
8	158.467	194	139.471	366	0.936524	1.53527	1.2359
	48.682		98.923
	207.149		238.394
pcDNA Mock
1	128.056	229	94.965	187	1.10609	1.0944	1.10025
	78.979		75.905
	207.035		170.87
2	107.851	176	103.515	239	1.04244	1.04112	1.04178
	60.983		126.046
	168.834		229.561
3	137.149	188	93.074	203	0.850633	0.992908	0.92177
	83.863		111.376
	221.012		204.45
4	98.222	206	72.862	144	0.991452	0.619757	0.805605		1.10025			1.01087
	109.554		159.487						1.04178
	207.776		232.349						0.92177
5	103.824	143	139.44	224	0.864733	0.904583	0.884658		0.805605
	61.545		108.188						0.884658
	165.369		247.628						1.26797
6	123.259	240	83.033	164	1.42941	1.10653	1.26797		0.986042
	44.642		65.178						1.07889
	167.901		148.211
7	77.525	156	112.634	226	0.79535	1.17673	0.986042
	118.615		79.423
	196.14		192.057
8	105.707	164	103.53	202	1.03099	1.12679	1.07889
	53.364		75.741
	159.071		179.271
pcDNA PTX
1	141.952	188	150.291	159	0.78099	0.737261	0.759126
	98.768		65.372
	240.72		215.663
2	156.737	214	110.178	230	0.839476	0.854041	0.846758
	98.184		159.13
	254.921		269.308
3	108.958	133	89.138	144	0.733911	0.741206	0.737558
	72.263		105.14
	181.221		194.278
4	127.244	148	198.423	163	0.691111	0.555334	0.623222		0.759126
	86.904		95.094						0.846758			0.809358
	214.148		293.517						0.737558
5	99.93	147	85.06	112	0.974174	0.851873	0.913024		0.623222
	50.967		46.415						0.913024
	150.897		131.475						0.95578
6	86.978	144	100.638	150	1.02761	0.883949	0.95578		0.846161
	53.153		69.055						0.793233
	140.131		169.693
7	147.57	235	95.817	157	0.929817	0.762506	0.846161
	105.168		110.083
	252.738		205.9
8	130.479	194	112.281	142	0.839554	0.746912	0.793233
	100.596		77.835
	231.075		190.116
REP3
HA-Prr7 Mock
Sample	D1 length sum	D1 count	D2 length	D2 count	D1	D2	Average
1	105.201	217	140.936	428	1.2298	1.40184	1.31582								HA-Prr7 Mock	HA-Prr7 PTX	pcDNA Mock	pcDNA PTX
	71.25		164.377												1.31582	1.29492	1.19931	0.674702
	176.451		305.313												1.23567	1.67108	0.992799	0.987862
2	87.073	187	71.768	195	1.19835	1.273	1.23567								1.64937	1.13442	1.20228	1.12033
	68.975		81.414												1.07548	1.1307	1.20454	0.87878
	156.048		153.182									1.34765			1.21075	1.17445	1.18127	0.656412
3	87.209	259	99.611	319	1.44533	1.85341	1.64937		1.31582						0.97794	1.35647	1.08899	0.824952
	91.989		72.504						1.23567						1.96854	1.17505	1.03943	0.517419
	179.198		172.115						1.64937							0.825132	0.842825
4	169.593	338	99.034	158	1.09004	1.06092	1.07548		1.07548
	140.486		49.894						1.21075
	310.079		148.928						0.97794
5	125.742	269	127.42	207	1.25747	1.16403	1.21075		1.96854
	88.179		50.411
	213.921		177.831
6	124.864	237	111.396	187	1.04794	0.907934	0.97794
	101.293		94.566
	226.157		205.962
7	103.795	316	159.49	465	1.77281	2.16426	1.96854
	74.453		55.364
	178.248		214.854
HA-Prr7 PTX
1	111.036	305	122.272	272	1.38605	1.20378	1.29492
	109.014		103.682
	220.05		225.954
2	171.671	345	102.638	291	1.46392	1.87823	1.67108
	63.997		52.295
	235.668		154.933
3	91.026	227	87.031	201	1.15028	1.11856	1.13442
	106.317		92.665
	197.343		179.696
4	170.412	372	162.099	342	1.17102	1.09038	1.1307		1.29492
	147.259		151.554						1.67108			1.22028
	317.671		313.653						1.13442
5	73.849	159	63.466	139	1.20022	1.14868	1.17445		1.1307
	58.627		57.542						1.17445
	132.476		121.008						1.35647
6	135.228	261	141.776	242	1.3657	1.34725	1.35647		1.17505
	55.883		37.849						0.825132
	191.111		179.625
7	94.733	250	168.01	274	1.10779	1.24231	1.17505
	130.941		52.547
	225.674		220.557
8	131.668	170	105.771	166	0.860067	0.790198	0.825132
	65.991		104.303
	197.659		210.074
pcDNA Mock
1	67.534	148	111.827	231	1.10877	1.28984	1.19931
	65.947		67.265
	133.481		179.092
2	111.021	183	78.434	140	0.950195	1.0354	0.992799
	81.571		56.779
	192.592		135.213
3	133.393	227	62.592	138	1.13493	1.26963	1.20228
	66.619		46.101
	200.012		108.693
4	131.896	224	116.144	232	1.12464	1.28443	1.20454		1.19931
	67.278		64.481						0.992799		1.09393
	199.174		180.625						1.20228
5	140.535	335	104.848	158	1.22243	1.14011	1.18127		1.20454
	133.509		33.735						1.18127
	274.044		138.583						1.08899
6	138.584	278	56.981	147	1.07647	1.1015	1.08899		1.03943
	119.668		76.473						0.842825
	258.252		133.454
7	130.765	259	115.573	243	0.986843	1.09202	1.03943
	131.688		106.951
	262.453		222.524
8	117.893	159	88.16	118	0.899789	0.78586	0.842825
	58.815		61.994
	176.708		150.154
pcDNA PTX
1	190.803	184	146.297	133	0.682639	0.666764	0.674702
	78.739		53.174
	269.542		199.471
2	112.779	150	126.103	247	0.979797	0.995928	0.987862
	40.314		121.907
	153.093		248.01
3	97.366	183	81.255	169	0.941116	1.29955	1.12033		0.674702		0.808637
	97.084		48.79						0.987862
	194.45		130.045						1.12033
4	92.628	185	79.069	89	1.09353	0.66403	0.87878		0.87878
	76.549		54.961						0.656412
	169.177		134.03						0.824952
5	152.583	208	85.21	75	0.782935	0.529889	0.656412		0.517419
	113.084		56.329
	265.667		141.539
6	241.965	251	51.52	92	0.908393	0.741511	0.824952
	34.347		72.551
	276.312		124.071
7	105.778	105	113.953	131	0.505968	0.52887	0.517419
	101.745		133.745
	207.523		247.698
	GRAND AVERAGES
			Rep1	Rep2	Rep3		Normalized
	pcDNA Mock		1.0117	1.01087	1.09393		1	1	1
	pcDNA PTX		0.79614	0.809358	0.808637		0.786935	0.800655	0.739204
	HA-Prr7 Mock		1.15231	1.28962	1.34765		1.13899	1.27575	1.23194
	HA-Prr7 PTX		1.36398	1.39321	1.22028		1.34821	1.37823	1.1155
			PTX/Mock
		pcDNA	0.786935	0.800655	0.739204
		HA-Prr7	1.18369	1.08033	0.905484

## Sheet: 2D
	pSUPER Empty			Ctr shRNA			Prr7 shRNA
	1	1	1	1.21137	1.6107	1.29932	0.748272	0.418968	0.186585
	GluA1/Tubulin
		Rep1	Rep2	Rep3	Average	SD	Rep1 Norm	Rep2 Norm	Rep3 Norm	Average	SD
	pSUPER Empty	0.393837	0.408297	0.350534	0.384223	0.0300575	1	1	1	1	0
	pSUPER PTM	0.477081	0.657644	0.455456	0.53006	0.111018	1.21137	1.6107	1.29932	1.3738	0.209825
	pSUPER 1.5	0.294697	0.171063	0.0654045	0.177055	0.114764	0.748272	0.418968	0.186585	0.451275	0.282234
	Prr7/Tubulin
	pSUPER Empty	0.31455	0.934976	0.574946	0.608157	0.311543	1	1	1	1	0
	pSUPER PTM	0.41885	1.16435	0.694523	0.75924	0.376939	1.33158	1.24532	1.20798	1.26163	0.0633953
	pSUPER 1.5	0.0384227	0.00925814	0.0119876	0.0198895	0.0161081	0.122151	0.00990201	0.02085	0.0509677	0.0618893

## Sheet: 2E
	Ctr shRNA			Prr7 shRNA
EtOH	249321	211916	192618	170472	186726	162049
PTX	202950	203792	166879	151969	185344	153230
	Rep1 from 2.10.19
		Mock Ctrsh	Mock Prr7sh	PTX Ctrsh	PTX Prr7sh
		320818	148532	190539	148532
		257164	251962	119314	189353
		271224	227676	151816	145855
		191628	205949	184964	239746
		248362	101674	199284	117467
		235483	220345	257154	73472.5
		220571	185308	233444	116299
			144040	173364	153202
			144125	316674	165064
			120861		170697
			124715
		249321	170472	202950	151969
	Rep2 from 8.12.20
		Mock Ctrsh	Mock Prr7sh	PTX Ctrsh	PTX Prr7sh
		192702	162711	203028	231580
		205728	183808	193929	188867
		231938	168237	195396	168632
		238223	263831	108140	177878
		202137	165819	236616	178941
		209311	184121	223420	175118
		203375	178555	242668	176390
				227141
		211916	186726	203792	185344
	Rep3 from 16.12.20
		Mock Ctrsh	Mock Prr7sh	PTX Ctrsh	PTX Prr7sh
		208315	237795	157282	150592
		185584	171613	170076	126350
		199840	178084	166961	162745
		157155	143733	172180	154781
		199689	134175	127726	127010
		218952	131812	157007	153265
		205505	137129	167247	202433
		165900		216552	148665
		192618	162049	166879	153230

## Sheet: 2F
	Ctr shRNA				Prr7 shRNA
Mock	0.014549	0.016314	0.018373	0.014668	0.00747	0.01125	0.014	0.01001
PTX	0.012425	0.009755	0.018851	0.013896	0.008703	0.010001	0.016086	0.010503
	1.7.20 CBinv number particles/selection area
	Mock	PTM	0.0122507	0	0.00419765	0.0236319	0.0136939	0.0190333	0.027619	0.0121149	0.0117916	0.0211578	0.0145491
	PTX	PTM	0.00224878	0.0185092	0.0135219	0.0114929	0.00427545	0.014008	0.0175562	0.0149737	0.0152407		0.0124252
	Mock	Prr7sh	0	0.00891408	0.0123987	0.00984774	0	0.0082157	0.0130764	0.0102831	0.00449246		0.0074698
	PTX	Prr7sh	0.0026475	0.00307863	0.0205822	0.0166456	0.025071	0.0016009	0	0			0.00870323
	Treatment	Transfection	Cell	Folder	Slice	Channel_Name	Selection	Cell.1	Selection_Area	Mask_Area	Random_Particles	Number_of_Particles	Mean	Number of particles/selection area
	Mock	GFP	1	01-07-20 GluA1 surface not healthiest	ZStacked	GFP	Cellbody-inversed	1	44557.6	875.13	184	149	3483.02	0.00334399
	Mock	Prr7sh	1	01-07-20 GluA1 surface not healthiest	ZStacked	GFP	Cellbody-inversed	1	44294	0.00839341	0	0		0
	PTX	Prr7sh	1	01-07-20 GluA1 surface not healthiest	ZStacked	GFP	Cellbody-inversed	1	44570.3	690.97	65	118	1352.72	0.0026475
	Mock	PTM	1	01-07-20 GluA1 surface not healthiest	ZStacked	GFP	Cellbody-inversed	1	43671	1519.11	271	535	6590.06	0.0122507
	PTX	PTM	1	01-07-20 GluA1 surface not healthiest	ZStacked	GFP	Cellbody-inversed	1	44468.6	1464.72	194	100	5485.65	0.00224878
	Mock	Prr7sh	2	01-07-20 GluA1 surface not healthiest	ZStacked	GFP	Cellbody-inversed	2	44536.3	1285.64	151	397	5252.72	0.00891408
	PTX	Prr7sh	2	01-07-20 GluA1 surface not healthiest	ZStacked	GFP	Cellbody-inversed	2	44500.2	1750.86	99	137	1208.62	0.00307863
	Mock	PTM	2	01-07-20 GluA1 surface not healthiest	ZStacked	GFP	Cellbody-inversed	2	44353.4	0.00839341	0	0		0
	PTX	PTM	2	01-07-20 GluA1 surface not healthiest	ZStacked	GFP	Cellbody-inversed	2	44140.2	2581.14	445	817	4760.05	0.0185092
	Mock	Prr7sh	3	01-07-20 GluA1 surface not healthiest	ZStacked	GFP	Cellbody-inversed	3	44520.8	1913.71	367	552	4806.07	0.0123987
	PTX	Prr7sh	3	01-07-20 GluA1 surface not healthiest	ZStacked	GFP	Cellbody-inversed	3	44358.8	2357.95	380	913	1085.97	0.0205822
	Mock	PTM	3	01-07-20 GluA1 surface not healthiest	ZStacked	GFP	Cellbody-inversed	3	43119.4	1163.9	155	181	6628.99	0.00419765
	PTX	PTM	3	01-07-20 GluA1 surface not healthiest	ZStacked	GFP	Cellbody-inversed	3	44298.4	2192.11	150	599	5033.93	0.0135219
	Mock	Prr7sh	4	01-07-20 GluA1 surface not healthiest	ZStacked	GFP	Cellbody-inversed	4	44172.6	1384.84	136	435	3718.8	0.00984774
	PTX	Prr7sh	4	01-07-20 GluA1 surface not healthiest	ZStacked	GFP	Cellbody-inversed	4	44215.9	2580.12	141	736	3201.24	0.0166456
	Mock	PTM	4	01-07-20 GluA1 surface not healthiest	ZStacked	GFP	Cellbody-inversed	4	44093	3619.1	361	1042	5556.35	0.0236319
	PTX	PTM	4	01-07-20 GluA1 surface not healthiest	ZStacked	GFP	Cellbody-inversed	4	44114.1	3259.18	300	507	5124.44	0.0114929
	Mock	Prr7sh	5	01-07-20 GluA1 surface not healthiest	ZStacked	GFP	Cellbody-inversed	5	44362.1	0.00839341	0	0		0
	PTX	Prr7sh	5	01-07-20 GluA1 surface not healthiest	ZStacked	GFP	Cellbody-inversed	5	44513.6	3712.46	519	1116	1540.51	0.025071
	Mock	PTM	5	01-07-20 GluA1 surface not healthiest	ZStacked	GFP	Cellbody-inversed	5	44472.4	2323.86	336	609	5928.32	0.0136939
	PTX	PTM	5	01-07-20 GluA1 surface not healthiest	ZStacked	GFP	Cellbody-inversed	5	44205.9	1585.29	207	189	4865.59	0.00427545
	Mock	Prr7sh	6	01-07-20 GluA1 surface not healthiest	ZStacked	GFP	Cellbody-inversed	6	44548.9	1385.93	109	366	3289.04	0.0082157
	PTX	Prr7sh	6	01-07-20 GluA1 surface not healthiest	ZStacked	GFP	Cellbody-inversed	6	44350.1	1592.3	84	71	3229.16	0.0016009
	Mock	PTM	6	01-07-20 GluA1 surface not healthiest	ZStacked	GFP	Cellbody-inversed	6	44448.3	2216.37	234	846	5383.47	0.0190333
	PTX	PTM	6	01-07-20 GluA1 surface not healthiest	ZStacked	GFP	Cellbody-inversed	6	44546	1554.22	215	624	3967.1	0.014008
	Mock	Prr7sh	7	01-07-20 GluA1 surface not healthiest	ZStacked	GFP	Cellbody-inversed	7	44507.6	1728.14	182	582	3141.79	0.0130764
	PTX	Prr7sh	7	01-07-20 GluA1 surface not healthiest	ZStacked	GFP	Cellbody-inversed	7	44411.3	0.00839341	0	0		0
	Mock	PTM	7	01-07-20 GluA1 surface not healthiest	ZStacked	GFP	Cellbody-inversed	7	44498.4	2800.04	441	1229	4509.2	0.027619
	PTX	PTM	7	01-07-20 GluA1 surface not healthiest	ZStacked	GFP	Cellbody-inversed	7	44257.8	2320.94	293	777	5480.67	0.0175562
	Mock	Prr7sh	8	01-07-20 GluA1 surface not healthiest	ZStacked	GFP	Cellbody-inversed	8	44539	1419.03	212	458	2870.22	0.0102831
	PTX	Prr7sh	8	01-07-20 GluA1 surface not healthiest	ZStacked	GFP	Cellbody-inversed	8	44565.6	0.00839341	0	0		0
	Mock	PTM	8	01-07-20 GluA1 surface not healthiest	ZStacked	GFP	Cellbody-inversed	8	44573.3	1260.55	190	540	3151.44	0.0121149
	PTX	PTM	8	01-07-20 GluA1 surface not healthiest	ZStacked	GFP	Cellbody-inversed	8	44544.9	1946.29	245	667	4003.98	0.0149737
	Mock	Prr7sh	9	01-07-20 GluA1 surface not healthiest	ZStacked	GFP	Cellbody-inversed	9	44519	676.475	43	200	2938.62	0.00449246
	Mock	PTM	9	01-07-20 GluA1 surface not healthiest	ZStacked	GFP	Cellbody-inversed	9	44523.3	1335.64	185	525	2757.38	0.0117916
	PTX	PTM	9	01-07-20 GluA1 surface not healthiest	ZStacked	GFP	Cellbody-inversed	9	44289.4	1490.64	151	675	4096.82	0.0152407
	Mock	PTM	10	01-07-20 GluA1 surface not healthiest	ZStacked	GFP	Cellbody-inversed	10	44333.6	2568.53	189	938	2498.56	0.0211578
	8.7.20
	Mock	PTM	0.0103985	0.020546	0.0163975	0.0228913	0.00456025	0.0145072	0.0198977	0.0213158			0.0163143
	PTX	PTM	0.00616452	0.0160772	0.00646397	0.0208704	0.00706373	0	0.0105913	0.0108088			0.00975498
	Mock	Prr7sh	0.01152	0.00903359	0.00660128	0.0082166	0.0129704	0.00684277	0.0131642	0.0119938	0.0150057	0.0171478	0.0112496
	PTX	Prr7sh	0.0078388	0.0142071	0	0.0173583	0.00882157	0.0139082	0.0110042	0.0168666	0		0.0100005
	Treatment	Transfection	Cell	Folder	Slice	Channel_Name	Selection	Cell.1	Selection_Area	Mask_Area	Random_Particles	Number_of_Particles	Mean	Number of particles/selection area
	Mock	GFP	1	08-07-20 GluA1 surface	ZStacked	GFP	Cellbody-inversed	1	44318.9	1638.7	303	747	9492.51	0.0168551
	PTX	GFP	1	08-07-20 GluA1 surface	ZStacked	GFP	Cellbody-inversed	1	44528.6	1462.28	144	441	5978.86	0.00990375
	Mock	Prr7sh	1	08-07-20 GluA1 surface	ZStacked	GFP	Cellbody-inversed	1	44531.1	1377.32	263	513	8021.02	0.01152
	PTX	Prr7sh	1	08-07-20 GluA1 surface	ZStacked	GFP	Cellbody-inversed	1	44522.1	1102.42	199	349	8730.97	0.0078388
	Mock	PTM	1	08-07-20 GluA1 surface	ZStacked	GFP	Cellbody-inversed	1	44525.8	1163.84	144	463	7433.83	0.0103985
	PTX	PTM	1	08-07-20 GluA1 surface	ZStacked	GFP	Cellbody-inversed	1	43961.2	662.953	137	271	6884.25	0.00616452
	Mock	GFP	2	08-07-20 GluA1 surface	ZStacked	GFP	Cellbody-inversed	2	44485.5	1634.37	556	688	11171.8	0.0154657
	PTX	GFP	2	08-07-20 GluA1 surface	ZStacked	GFP	Cellbody-inversed	2	44142.3	0.00839341	0	0		0
	Mock	Prr7sh	2	08-07-20 GluA1 surface	ZStacked	GFP	Cellbody-inversed	2	44500.6	1236.45	250	402	9401.18	0.00903359
	PTX	Prr7sh	2	08-07-20 GluA1 surface	ZStacked	GFP	Cellbody-inversed	2	44414.3	1611	436	631	8443.4	0.0142071
	Mock	PTM	2	08-07-20 GluA1 surface	ZStacked	GFP	Cellbody-inversed	2	44388.2	1875.53	644	912	8015.85	0.020546
	PTX	PTM	2	08-07-20 GluA1 surface	ZStacked	GFP	Cellbody-inversed	2	44161.8	2178.07	354	710	6627.04	0.0160772
	Mock	GFP	3	08-07-20 GluA1 surface	ZStacked	GFP	Cellbody-inversed	3	44414.5	2976.68	367	1242	9946.67	0.0279638
	PTX	GFP	3	08-07-20 GluA1 surface	ZStacked	GFP	Cellbody-inversed	3	44111.3	0.00839341	0	0		0
	Mock	Prr7sh	3	08-07-20 GluA1 surface	ZStacked	GFP	Cellbody-inversed	3	44536.8	613.096	170	294	6685.78	0.00660128
	PTX	Prr7sh	3	08-07-20 GluA1 surface	ZStacked	GFP	Cellbody-inversed	3	44269.4	0.00839341	0	0		0
	Mock	PTM	3	08-07-20 GluA1 surface	ZStacked	GFP	Cellbody-inversed	3	44519	1524.66	437	730	8252.38	0.0163975
	PTX	PTM	3	08-07-20 GluA1 surface	ZStacked	GFP	Cellbody-inversed	3	44554.7	1400.42	105	288	7014.78	0.00646397
	Mock	GFP	4	08-07-20 GluA1 surface	ZStacked	GFP	Cellbody-inversed	4	44489.4	2554.17	446	789	8587.53	0.0177346
	PTX	GFP	4	08-07-20 GluA1 surface	ZStacked	GFP	Cellbody-inversed	4	44390.9	821.01	238	371	7554.32	0.00835757
	Mock	Prr7sh	4	08-07-20 GluA1 surface	ZStacked	GFP	Cellbody-inversed	4	44544	1041.4	254	366	8057.39	0.0082166
	PTX	Prr7sh	4	08-07-20 GluA1 surface	ZStacked	GFP	Cellbody-inversed	4	44531.9	2319.4	268	773	5985.34	0.0173583
	Mock	PTM	4	08-07-20 GluA1 surface	ZStacked	GFP	Cellbody-inversed	4	44514.8	2538.88	448	1019	8723.95	0.0228913
	PTX	PTM	4	08-07-20 GluA1 surface	ZStacked	GFP	Cellbody-inversed	4	44512.9	2449.83	476	929	7783.65	0.0208704
	Mock	GFP	5	08-07-20 GluA1 surface	ZStacked	GFP	Cellbody-inversed	5	44557.6	1209.67	333	623	10172.4	0.0139819
	PTX	GFP	5	08-07-20 GluA1 surface	ZStacked	GFP	Cellbody-inversed	5	44408.6	1159.49	204	403	6785.67	0.00907483
	Mock	Prr7sh	5	08-07-20 GluA1 surface	ZStacked	GFP	Cellbody-inversed	5	44563	1607.35	434	578	8366.2	0.0129704
	PTX	Prr7sh	5	08-07-20 GluA1 surface	ZStacked	GFP	Cellbody-inversed	5	44323.2	1383.33	265	391	7346.17	0.00882157
	Mock	PTM	5	08-07-20 GluA1 surface	ZStacked	GFP	Cellbody-inversed	5	44295.8	550.775	112	202	8674.67	0.00456025
	PTX	PTM	5	08-07-20 GluA1 surface	ZStacked	GFP	Cellbody-inversed	5	44169.3	998.538	146	312	6387.91	0.00706373
	Mock	GFP	6	08-07-20 GluA1 surface	ZStacked	GFP	Cellbody-inversed	6	44525.1	2197.76	647	773	9173.39	0.017361
	PTX	GFP	6	08-07-20 GluA1 surface	ZStacked	GFP	Cellbody-inversed	6	44298.1	687.353	153	271	5991.06	0.00611764
	Mock	Prr7sh	6	08-07-20 GluA1 surface	ZStacked	GFP	Cellbody-inversed	6	44572.6	769.298	144	305	7974.2	0.00684277
	PTX	Prr7sh	6	08-07-20 GluA1 surface	ZStacked	GFP	Cellbody-inversed	6	44506.1	1822.54	250	619	6328.86	0.0139082
	Mock	PTM	6	08-07-20 GluA1 surface	ZStacked	GFP	Cellbody-inversed	6	44460.8	1777.9	255	645	7976.98	0.0145072
	PTX	PTM	6	08-07-20 GluA1 surface	ZStacked	GFP	Cellbody-inversed	6	43989.4	0.00839341	0	0		0
	Mock	GFP	7	08-07-20 GluA1 surface	ZStacked	GFP	Cellbody-inversed	7	44517	2496.48	382	802	9006.23	0.0180156
	PTX	GFP	7	08-07-20 GluA1 surface	ZStacked	GFP	Cellbody-inversed	7	44425	906.597	194	300	7200.95	0.00675296
	Mock	Prr7sh	7	08-07-20 GluA1 surface	ZStacked	GFP	Cellbody-inversed	7	44514.6	1732.11	362	586	8896.56	0.0131642
	PTX	Prr7sh	7	08-07-20 GluA1 surface	ZStacked	GFP	Cellbody-inversed	7	44528.5	1613.15	282	490	4823.17	0.0110042
	Mock	PTM	7	08-07-20 GluA1 surface	ZStacked	GFP	Cellbody-inversed	7	44427.3	2305.42	422	884	8117.23	0.0198977
	PTX	PTM	7	08-07-20 GluA1 surface	ZStacked	GFP	Cellbody-inversed	7	44376.1	1409.29	282	470	6971.9	0.0105913
	Mock	GFP	8	08-07-20 GluA1 surface	ZStacked	GFP	Cellbody-inversed	8	44518.4	2679.96	383	766	8499.91	0.0172064
	PTX	GFP	8	08-07-20 GluA1 surface	ZStacked	GFP	Cellbody-inversed	8	44409.9	2409.01	349	768	7672.09	0.0172934
	Mock	Prr7sh	8	08-07-20 GluA1 surface	ZStacked	GFP	Cellbody-inversed	8	44523	1650.72	191	534	9112.51	0.0119938
	PTX	Prr7sh	8	08-07-20 GluA1 surface	ZStacked	GFP	Cellbody-inversed	8	44525.9	1775.88	308	751	6491.45	0.0168666
	Mock	PTM	8	08-07-20 GluA1 surface	ZStacked	GFP	Cellbody-inversed	8	44520.9	2236.9	322	949	7949.65	0.0213158
	PTX	PTM	8	08-07-20 GluA1 surface	ZStacked	GFP	Cellbody-inversed	8	44315.9	1076.31	363	479	6400.6	0.0108088
	Mock	GFP	9	08-07-20 GluA1 surface	ZStacked	GFP	Cellbody-inversed	9	44504.7	3249.77	800	1766	9187.48	0.0396812
	PTX	GFP	9	08-07-20 GluA1 surface	ZStacked	GFP	Cellbody-inversed	9	44230.9	2455.05	302	720	7248.75	0.0162782
	Mock	Prr7sh	9	08-07-20 GluA1 surface	ZStacked	GFP	Cellbody-inversed	9	44582.9	1534.88	371	669	9113.15	0.0150057
	PTX	Prr7sh	9	08-07-20 GluA1 surface	ZStacked	GFP	Cellbody-inversed	9	44373.6	0.00839341	0	0		0
	Mock	GFP	10	08-07-20 GluA1 surface	ZStacked	GFP	Cellbody-inversed	10	44535.8	1714.79	280	558	10426.5	0.0125292
	PTX	GFP	10	08-07-20 GluA1 surface	ZStacked	GFP	Cellbody-inversed	10	43979.4	1154.09	228	363	7375.99	0.00825387
	Mock	Prr7sh	10	08-07-20 GluA1 surface	ZStacked	GFP	Cellbody-inversed	10	44495.5	1459.9	500	763	8660.34	0.0171478
	29.7.20
	Mock	PTM	0.0150376	0.0170026	0.020176	0.0215468	0.0307839	0.0133135	0.0218998	0	0.0182958	0.0256721	0.0183728
	PTX	PTM	0.00805109	0.00948004	0.0220544	0.0342359	0.0155879	0.0180066	0.0242674	0.0156093	0.0223627		0.0188506
	Mock	Prr7sh	0.00100105	0.00223622	0.0158549	0.0181229	0.0252299	0.0248395	0.0199454	0.0217413	0.0106226	0.000405605	0.0139999
	PTX	Prr7sh	0.0123059	0.00177718	0.0189587	0.0179954	0.0269552	0.0218307	0.0159225	0.00435316	0.0182133	0.02255	0.0160862
	Treatment	Transfection	Cell	Folder	Slice	Channel_Name	Selection	Cell.1	Selection_Area	Mask_Area	Random_Particles	Number_of_Particles	Mean	Number of particles/selection area
	Mock	GFP	1	29-07-20 GluA1 surface	ZStacked	GFP	Cellbody-inversed	1	44519.9	2266.07	620	1116	1150.25	0.0250674
	PTX	GFP	1	29-07-20 GluA1 surface	ZStacked	GFP	Cellbody-inversed	1	44319.9	1950.49	679	1183	853.427	0.0266923
	Mock	Prr7sh	1	29-07-20 GluA1 surface	ZStacked	GFP	Cellbody-inversed	1	44531.6	1478.46	224	548	1628.6	0.0123059
	PTX	Prr7sh	1	29-07-20 GluA1 surface	ZStacked	GFP	Cellbody-inversed	1	43953.9	1195.11	7	44	3005.14	0.00100105
	Mock	PTM	1	29-07-20 GluA1 surface	ZStacked	GFP	Cellbody-inversed	1	44466	761.072	231	358	914.963	0.00805109
	PTX	PTM	1	29-07-20 GluA1 surface	ZStacked	GFP	Cellbody-inversed	1	44089.6	1430.25	254	663	2710.53	0.0150376
	Mock	GFP	2	29-07-20 GluA1 surface	ZStacked	GFP	Cellbody-inversed	2	44522	1466.76	526	768	737.446	0.0172499
	PTX	GFP	2	29-07-20 GluA1 surface	ZStacked	GFP	Cellbody-inversed	2	43983.4	722.614	207	349	791.547	0.00793482
	Mock	Prr7sh	2	29-07-20 GluA1 surface	ZStacked	GFP	Cellbody-inversed	2	44452.5	2117.54	54	79	3310.55	0.00177718
	PTX	Prr7sh	2	29-07-20 GluA1 surface	ZStacked	GFP	Cellbody-inversed	2	44271.2	513.064	40	99	2418.57	0.00223622
	Mock	PTM	2	29-07-20 GluA1 surface	ZStacked	GFP	Cellbody-inversed	2	44514.6	775.03	172	422	1557.2	0.00948004
	PTX	PTM	2	29-07-20 GluA1 surface	ZStacked	GFP	Cellbody-inversed	2	44404.9	1744.94	373	755	2652.46	0.0170026
	Mock	GFP	3	29-07-20 GluA1 surface	ZStacked	GFP	Cellbody-inversed	3	44356	2257.02	677	1071	1395.37	0.0241456
	PTX	GFP	3	29-07-20 GluA1 surface	ZStacked	GFP	Cellbody-inversed	3	44070.1	623.924	137	241	835.113	0.00546855
	Mock	Prr7sh	3	29-07-20 GluA1 surface	ZStacked	GFP	Cellbody-inversed	3	44517.8	2015.6	374	844	1367.23	0.0189587
	PTX	Prr7sh	3	29-07-20 GluA1 surface	ZStacked	GFP	Cellbody-inversed	3	44276.5	1887.7	287	702	1286.68	0.0158549
	Mock	PTM	3	29-07-20 GluA1 surface	ZStacked	GFP	Cellbody-inversed	3	44526.4	2814.08	489	982	1478.41	0.0220544
	PTX	PTM	3	29-07-20 GluA1 surface	ZStacked	GFP	Cellbody-inversed	3	44310.2	1921.52	345	894	2754.72	0.020176
	Mock	GFP	4	29-07-20 GluA1 surface	ZStacked	GFP	Cellbody-inversed	4	44511.8	2470.47	528	880	1338.4	0.01977
	PTX	GFP	4	29-07-20 GluA1 surface	ZStacked	GFP	Cellbody-inversed	4	44285.5	2641.53	937	1330	718.223	0.0300324
	Mock	Prr7sh	4	29-07-20 GluA1 surface	ZStacked	GFP	Cellbody-inversed	4	44511.5	2414.74	394	801	1824.25	0.0179954
	PTX	Prr7sh	4	29-07-20 GluA1 surface	ZStacked	GFP	Cellbody-inversed	4	44529.4	1693.65	397	807	1401.35	0.0181229
	Mock	PTM	4	29-07-20 GluA1 surface	ZStacked	GFP	Cellbody-inversed	4	44485.5	3113.67	990	1523	1294.72	0.0342359
	PTX	PTM	4	29-07-20 GluA1 surface	ZStacked	GFP	Cellbody-inversed	4	44136.5	2404.21	500	951	1938.05	0.0215468
	Mock	GFP	5	29-07-20 GluA1 surface	ZStacked	GFP	Cellbody-inversed	5	44477.5	3120.58	640	1491	1044.34	0.0335225
	PTX	GFP	5	29-07-20 GluA1 surface	ZStacked	GFP	Cellbody-inversed	5	44216	2583.29	286	478	1002.01	0.0108106
	Mock	Prr7sh	5	29-07-20 GluA1 surface	ZStacked	GFP	Cellbody-inversed	5	44518.4	2277.16	664	1200	1157.49	0.0269552
	PTX	Prr7sh	5	29-07-20 GluA1 surface	ZStacked	GFP	Cellbody-inversed	5	44153.9	2141.08	654	1114	1151.67	0.0252299
	Mock	PTM	5	29-07-20 GluA1 surface	ZStacked	GFP	Cellbody-inversed	5	44393.5	2048.99	744	692	1305.21	0.0155879
	PTX	PTM	5	29-07-20 GluA1 surface	ZStacked	GFP	Cellbody-inversed	5	44406.3	2834.41	644	1367	1582.01	0.0307839
	Mock	GFP	6	29-07-20 GluA1 surface	ZStacked	GFP	Cellbody-inversed	6	44442.9	1674.18	509	697	1006.08	0.015683
	PTX	GFP	6	29-07-20 GluA1 surface	ZStacked	GFP	Cellbody-inversed	6	44359.9	1870.79	739	971	738.968	0.0218892
	Mock	Prr7sh	6	29-07-20 GluA1 surface	ZStacked	GFP	Cellbody-inversed	6	44524.4	1997.53	436	972	1053.4	0.0218307
	PTX	Prr7sh	6	29-07-20 GluA1 surface	ZStacked	GFP	Cellbody-inversed	6	44284.3	1888.78	649	1100	1131.06	0.0248395
	Mock	PTM	6	29-07-20 GluA1 surface	ZStacked	GFP	Cellbody-inversed	6	44539.1	1631.81	343	802	1859.36	0.0180066
	PTX	PTM	6	29-07-20 GluA1 surface	ZStacked	GFP	Cellbody-inversed	6	44466.2	1061.89	193	592	1396.56	0.0133135
	Mock	GFP	7	29-07-20 GluA1 surface	ZStacked	GFP	Cellbody-inversed	7	44418.7	1337.98	394	714	821.401	0.0160743
	PTX	GFP	7	29-07-20 GluA1 surface	ZStacked	GFP	Cellbody-inversed	7	43727.9	515.061	159	287	755.57	0.00656331
	Mock	Prr7sh	7	29-07-20 GluA1 surface	ZStacked	GFP	Cellbody-inversed	7	44528.2	1608.81	358	709	1653.42	0.0159225
	PTX	Prr7sh	7	29-07-20 GluA1 surface	ZStacked	GFP	Cellbody-inversed	7	44521.6	2378.05	460	888	1170.46	0.0199454
	Mock	PTM	7	29-07-20 GluA1 surface	ZStacked	GFP	Cellbody-inversed	7	44504.2	2545.24	669	1080	1218.56	0.0242674
	PTX	PTM	7	29-07-20 GluA1 surface	ZStacked	GFP	Cellbody-inversed	7	44246.9	1722.64	406	969	1376.16	0.0218998
	Mock	GFP	8	29-07-20 GluA1 surface	ZStacked	GFP	Cellbody-inversed	8	44211.6	2798.19	832	1571	919.669	0.0355336
	PTX	GFP	8	29-07-20 GluA1 surface	ZStacked	GFP	Cellbody-inversed	8	43835	0.00839341	0	0		0
	Mock	Prr7sh	8	29-07-20 GluA1 surface	ZStacked	GFP	Cellbody-inversed	8	44565.3	1260.92	106	194	2274.28	0.00435316
	PTX	Prr7sh	8	29-07-20 GluA1 surface	ZStacked	GFP	Cellbody-inversed	8	44201.6	1933.15	430	961	1083.5	0.0217413
	Mock	PTM	8	29-07-20 GluA1 surface	ZStacked	GFP	Cellbody-inversed	8	44396.7	2029.42	408	693	1822.61	0.0156093
	PTX	PTM	8	29-07-20 GluA1 surface	ZStacked	GFP	Cellbody-inversed	8	44272.2	0.00839341	0	0		0
	Mock	GFP	9	29-07-20 GluA1 surface	ZStacked	GFP	Cellbody-inversed	9	44140.5	2397.95	594	1176	944.861	0.0266422
	PTX	GFP	9	29-07-20 GluA1 surface	ZStacked	GFP	Cellbody-inversed	9	44358	2229.71	643	1456	768.404	0.0328238
	Mock	Prr7sh	9	29-07-20 GluA1 surface	ZStacked	GFP	Cellbody-inversed	9	43869.1	1895.77	402	799	1289.02	0.0182133
	PTX	Prr7sh	9	29-07-20 GluA1 surface	ZStacked	GFP	Cellbody-inversed	9	44433.6	1558.19	247	472	1271.54	0.0106226
	Mock	PTM	9	29-07-20 GluA1 surface	ZStacked	GFP	Cellbody-inversed	9	43867.7	1914.89	401	981	1835.58	0.0223627
	PTX	PTM	9	29-07-20 GluA1 surface	ZStacked	GFP	Cellbody-inversed	9	44491.2	1420.6	349	814	1737.42	0.0182958
	Mock	GFP	10	29-07-20 GluA1 surface	ZStacked	GFP	Cellbody-inversed	10	44499.6	2423	101	189	1685.22	0.00424723
	Mock	Prr7sh	10	29-07-20 GluA1 surface	ZStacked	GFP	Cellbody-inversed	10	44523.2	2261.42	577	1004	1282	0.02255
	PTX	Prr7sh	10	29-07-20 GluA1 surface	ZStacked	GFP	Cellbody-inversed	10	44378.1	1232.52	15	18	3720.47	0.000405605
	PTX	PTM	10	29-07-20 GluA1 surface	ZStacked	GFP	Cellbody-inversed	10	44523	2168.08	808	1143	1250.3	0.0256721
	6.5.21
	CBinv num particles
	Mock	Ctrsh	0.0170631	0.0156188	0.011313	0.0159258	0.0216486	0.0113632	0.0251669	0.00292779	0.0110901	0.0145631		0.014668
	PTX	Ctrsh	0.0189762	0.0117921	0.0165671	0.0174049	0.00837455	0.00760651	0.0144278	0.0121132	0.0164525	0.0152502		0.0138965
	Mock	Prr7sh	0.0119129	0.0109165	0.00808171	0.0100626	0.0153275	0.00696519	0.00904704	0.00871273	0.0101198	0.0101754	0.00878789	0.0100099
	PTX	Prr7sh	0.0144608	0.00856753	0.0183928	0.00974565	0.00792316	0.0151211	0.00236555	0.00544519	0.0114529	0.0115567		0.0105031
		Treatment	Transfection	Cell	Folder	Slice	Channel_Name	Selection	Cell.1	Selection_Area	Mask_Area	Random_Particles	Number_of_Particles	Mean	Number of particles/selection area
	1	Mock	Ctrsh	1	210506 sGluA1 prr7kd	ZStacked	GFP	Cellbody-inversed	1	44540.6	1242.67	421	760	6299.93	0.0170631
	2	PTX	Ctrsh	1	210506 sGluA1 prr7kd	ZStacked	GFP	Cellbody-inversed	1	44476.8	1778.07	527	844	5297.43	0.0189762
	3	Mock	Prr7sh	1	210506 sGluA1 prr7kd	ZStacked	GFP	Cellbody-inversed	1	44489.6	910.366	297	530	5488.7	0.0119129
	4	PTX	Prr7sh	1	210506 sGluA1 prr7kd	ZStacked	GFP	Cellbody-inversed	1	44534.3	1185.48	173	644	4353.34	0.0144608
	5	Mock	Ctrsh	2	210506 sGluA1 prr7kd	ZStacked	GFP	Cellbody-inversed	2	44433.8	1263.23	503	694	7461.79	0.0156188
	6	PTX	Ctrsh	2	210506 sGluA1 prr7kd	ZStacked	GFP	Cellbody-inversed	2	44351.9	684.961	71	523	7627.4	0.0117921
	7	Mock	Prr7sh	2	210506 sGluA1 prr7kd	ZStacked	GFP	Cellbody-inversed	2	44519.7	978.671	328	486	9234.74	0.0109165
	8	PTX	Prr7sh	2	210506 sGluA1 prr7kd	ZStacked	GFP	Cellbody-inversed	2	44353.5	683.467	151	380	5996.45	0.00856753
	9	Mock	Ctrsh	3	210506 sGluA1 prr7kd	ZStacked	GFP	Cellbody-inversed	3	44550.7	752.561	249	504	7890.08	0.011313
	10	PTX	Ctrsh	3	210506 sGluA1 prr7kd	ZStacked	GFP	Cellbody-inversed	3	44365	1335.7	456	735	6669.29	0.0165671
	11	Mock	Prr7sh	3	210506 sGluA1 prr7kd	ZStacked	GFP	Cellbody-inversed	3	44545	733.567	154	360	8447.23	0.00808171
	12	PTX	Prr7sh	3	210506 sGluA1 prr7kd	ZStacked	GFP	Cellbody-inversed	3	44528.2	1713.17	428	819	6481.39	0.0183928
	13	Mock	Ctrsh	4	210506 sGluA1 prr7kd	ZStacked	GFP	Cellbody-inversed	4	44519	1175.19	557	709	8808.64	0.0159258
	14	PTX	Ctrsh	4	210506 sGluA1 prr7kd	ZStacked	GFP	Cellbody-inversed	4	43953.2	1809.33	352	765	7311.33	0.0174049
	15	Mock	Prr7sh	4	210506 sGluA1 prr7kd	ZStacked	GFP	Cellbody-inversed	4	44421.7	614.087	271	447	6690.64	0.0100626
	16	PTX	Prr7sh	4	210506 sGluA1 prr7kd	ZStacked	GFP	Cellbody-inversed	4	44532.7	703.015	218	434	6745.15	0.00974565
	17	Mock	Ctrsh	5	210506 sGluA1 prr7kd	ZStacked	GFP	Cellbody-inversed	5	44529.3	1386.23	681	964	7924.48	0.0216486
	18	PTX	Ctrsh	5	210506 sGluA1 prr7kd	ZStacked	GFP	Cellbody-inversed	5	44420.3	589.284	179	372	6894.06	0.00837455
	19	Mock	Prr7sh	5	210506 sGluA1 prr7kd	ZStacked	GFP	Cellbody-inversed	5	44560.4	1269.43	441	683	7470.19	0.0153275
	20	PTX	Prr7sh	5	210506 sGluA1 prr7kd	ZStacked	GFP	Cellbody-inversed	5	44300.5	626.534	167	351	6898.24	0.00792316
	21	Mock	Ctrsh	6	210506 sGluA1 prr7kd	ZStacked	GFP	Cellbody-inversed	6	44529.7	903.307	279	506	8794.56	0.0113632
	22	PTX	Ctrsh	6	210506 sGluA1 prr7kd	ZStacked	GFP	Cellbody-inversed	6	44304.2	641.441	145	337	7189.33	0.00760651
	23	Mock	Prr7sh	6	210506 sGluA1 prr7kd	ZStacked	GFP	Cellbody-inversed	6	44507	587.194	76	310	8418.57	0.00696519
	24	PTX	Prr7sh	6	210506 sGluA1 prr7kd	ZStacked	GFP	Cellbody-inversed	6	44507.3	1272.16	382	673	5182.47	0.0151211
	25	Mock	Ctrsh	7	210506 sGluA1 prr7kd	ZStacked	GFP	Cellbody-inversed	7	44542.7	1599.06	490	1121	6704.45	0.0251669
	26	PTX	Ctrsh	7	210506 sGluA1 prr7kd	ZStacked	GFP	Cellbody-inversed	7	44289.3	1978.19	294	639	7918.08	0.0144278
	27	Mock	Prr7sh	7	210506 sGluA1 prr7kd	ZStacked	GFP	Cellbody-inversed	7	44545	663.415	241	403	8768.4	0.00904704
	28	PTX	Prr7sh	7	210506 sGluA1 prr7kd	ZStacked	GFP	Cellbody-inversed	7	44387.2	253.666	46	105	4609.94	0.00236555
	29	Mock	Ctrsh	8	210506 sGluA1 prr7kd	ZStacked	GFP	Cellbody-inversed	8	44402.1	202.81	66	130	5919.16	0.00292779
	30	PTX	Ctrsh	8	210506 sGluA1 prr7kd	ZStacked	GFP	Cellbody-inversed	8	44331.8	1089.53	346	537	7602.96	0.0121132
	31	Mock	Prr7sh	8	210506 sGluA1 prr7kd	ZStacked	GFP	Cellbody-inversed	8	44532.6	692.8	157	388	8150.3	0.00871273
	32	PTX	Prr7sh	8	210506 sGluA1 prr7kd	ZStacked	GFP	Cellbody-inversed	8	44442.9	771.421	104	242	6035.27	0.00544519
	33	Mock	Ctrsh	9	210506 sGluA1 prr7kd	ZStacked	GFP	Cellbody-inversed	9	44544.3	1028.17	377	494	8232.29	0.0110901
	34	PTX	Ctrsh	9	210506 sGluA1 prr7kd	ZStacked	GFP	Cellbody-inversed	9	44491.8	1305.02	363	732	6718.33	0.0164525
	35	Mock	Prr7sh	9	210506 sGluA1 prr7kd	ZStacked	GFP	Cellbody-inversed	9	44467.1	869.314	194	450	7029.87	0.0101198
	36	PTX	Prr7sh	9	210506 sGluA1 prr7kd	ZStacked	GFP	Cellbody-inversed	9	44530.1	1342.74	376	510	6282	0.0114529
	37	Mock	Ctrsh	10	210506 sGluA1 prr7kd	ZStacked	GFP	Cellbody-inversed	10	44564.7	1246.82	494	649	7807.22	0.0145631
	38	PTX	Ctrsh	10	210506 sGluA1 prr7kd	ZStacked	GFP	Cellbody-inversed	10	44524.1	1470.84	544	679	7933.16	0.0152502
	39	Mock	Prr7sh	10	210506 sGluA1 prr7kd	ZStacked	GFP	Cellbody-inversed	10	44519	948.371	197	453	8449.22	0.0101754
	40	PTX	Prr7sh	10	210506 sGluA1 prr7kd	ZStacked	GFP	Cellbody-inversed	10	44563.1	777.028	154	515	4910.73	0.0115567
	41	Mock	Prr7sh	11	210506 sGluA1 prr7kd	ZStacked	GFP	Cellbody-inversed	11	44379.3	683.332	126	390	8364.58	0.00878789
