# Supplementary material for: miR-329– and miR-495–mediated Prr7 down-regulation is required for homeostatic synaptic depression in rat hippocampal neurons
Source: Life Sci Alliance. 2022 Sep 23;5(12):e202201520. doi: 10.26508/lsa.202201520 (PMC9510147; doi:10.26508/lsa.202201520)
Supplement: Supplementary file 5 [file LSA-2022-01520_SdataF3.1.xlsx]

## Sheet: 3B
		Ctr pLNA			329/495 pLNA
		Rep1	Rep2	Rep3	Rep1	Rep2	Rep3
	Prr7 3' UTR-WT	0.75	0.645097	0.69153	1.15	1.4465	0.957058
	Prr7 3' UTR-Mut	0.9	0.953645	0.804484	1.01	1.07972	0.774177
	329/495 mix raw values
	Prr7 WT + pLNA CTR					Prr7 WT + pLNA CTR 48h PTX					Prr7 WT + pLNA 329/495					Prr7 WT + pLNA 329/495 PTX					Prr7 MUT3 + pLNA CTR					Prr7 MUT3 + pLNA CTR 48h PTX					Prr7 MUT3 + pLNA 329/495					Prr7 MUT3 + pLNA 329/495 48h PTX
	190703	190807	190821			190703	190807	190821			190703	190807	190821			190703	190807	190821			190703	190807	190821			190703	190807	190821			190703	190807	190821			190703	190807	190821
	1	1	1			0.752239	0.643564	0.69153			0.602985	0.393069	0.592517			0.695522	0.569307	0.567074			0.773134	0.549505	0.725201			0.695522	0.430198	0.583413			0.743284	0.59901	0.724022			0.749254	0.648515	0.560521

## Sheet: 3C
		Ctr pLNA				495 pLNA
		Rep1	Rep2	Rep3	Rep4	Rep1	Rep2	Rep3	Rep4
	Prr7 3' UTR-WT	0.712625	0.523669	0.845899	0.736954	0.989386	0.828491	1.34132	1.09817
	Prr7 3' UTR-Mut	0.902529	0.723129	0.648743	1.10924	0.779674	0.751104	0.708441	0.768746
	495 pLNA raw
	Prr7 WT + pLNA CTR					Prr7 WT + pLNA CTR 48h PTX					Prr7 WT + pLNA 495					Prr7 WT + pLNA 495 PTX					Prr7 MUT3 + pLNA CTR					Prr7 MUT3 + pLNA CTR 48h PTX					Prr7 MUT3 + pLNA 495					Prr7 MUT3 + pLNA 495 48h PTX
	190828	190904	190911	200226		190828	190904	190911	200226		190828	190904	190911	200226		190828	190904	190911	200226		190828	190904	190911	200226		190828	190904	190911	200226		190828	190904	190911	200226		190828	190904	190911	200226
	1	1	1	1		0.712625	0.523669	0.845899	0.736954		0.616103	0.486275	0.512868	0.536634		0.609564	0.402874	0.687922	0.589316		0.904036	0.491498	1.39354	2.15598		0.815919	0.355417	0.90405	2.3915		0.928231	0.500754	1.27914	2.22226		0.723717	0.376118	0.906198	1.70835

## Sheet: 3D
		Ctr pLNA				329 pLNA
		Rep1	Rep2	Rep3	Rep4	Rep1	Rep2	Rep3	Rep4
	Prr7 3' UTR-WT	0.704151	0.78028	0.625031	0.768153	0.716191	1.03976	1.42802	1.03368
	Prr7 3' UTR-Mut	0.868512	0.796106	0.534658	1.13918	0.880241	0.83691	0.407677	0.981278
	329 pLNA raw
	Prr7 WT + pLNA CTR					Prr7 WT + pLNA CTR 48h PTX					Prr7 WT + pLNA 329					Prr7 WT + pLNA 329 PTX					Prr7 MUT3 + pLNA CTR					Prr7 MUT3 + pLNA CTR 48h PTX					Prr7 MUT3 + pLNA 329					Prr7 MUT3 + pLNA 329 48h PTX
	190911	190828	191009	200226		190911	190828	191009	200226		190911	190828	191009	200226		190911	190828	191009	200226		190911	190828	191009	200226		190911	190828	191009	200226		190911	190828	191009	200226		190911	190828	191009	200226
	1	1	1	1		0.704151	0.780281	0.625031	0.768153		0.494877	0.626506	0.165707	0.213797		0.354427	0.651418	0.236632	0.220998		0.627612	0.532985	0.680903	0.544321		0.545089	0.424313	0.36405	0.62008		0.602206	0.52036	0.36405	0.34681		0.530086	0.435495	0.148415	0.340317

## Sheet: 3E
		Ctr pLNA	329 pLNA	495 pLNA	329/495 pLNA
	17-06-20	0.779595	0.882697	0.970822	1.07787
	30-09-21	0.883367	0.833913	0.926332	1.04251
	25-05-21	0.829498	0.766913	0.834335	0.956688
	17-06-20
	Mock Ctr	4369.01	3538.51	6614.51	4812.46	3686.6	3849.41	3735.76						4372.87		0.779595	0.779595
	PTX Ctr	3552.7	4606.49	4106.79	2999.65	3175.45	3122.51	3026.33	2826.26					3409.07			0.882697
	Mock 329	3101.59	3359.92	3431.25	3985.97	3076.39	3060.01	3250.22	3510.59					3382.05		0.882697	0.970822
	PTX 329	3158.51	3284.07	3248.47	3108.45	2901.51	2755.72	2613.74						2985.33			1.07787
	Mock 495	3918.33	3230.78	3617.17	3239.76	3290.45	2986.92	3578.26	3825.46					3395.54		0.970822
	PTX 495	3255.99	3394.95	4119.49	3522.13	3079.46	2884.17	3149.59	3257.39	2964.54				3296.47
	Mock 329 495	4125.84	3158.11	4215.16	4731.34	4608.81	5048.57	4127.93						4314.99		1.07787
	PTX 329 495	4971.6	5725.93	4209.83	4584.5	4780.29	4377.34	4228.19						4651.01
	30-09-21
	Mock Ctr	1850.28	1772.86	1737.72	1632.29	1585.76	2012.9	996.754	933.809	1452.04	1574.25	1018.97		1471.74		0.883367	0.883367
	PTX Ctr	1299.92	1219.62	777.366	904.029	1251.61	1674.04	1539.63	1459.89	1517.69	1356.88			1300.08			0.833913
	Mock 329	1768.47	1885.26	2037.69	2300.2	2013.06	1945.36	2125.08	1809.99	1421.89	1391.33			1881.1		0.833913	0.926332
	PTX 329	1244.4	1364.99	1413.65	1210.88	3041.82	1766.04	1783.05	1017.54	1361.88	1158.19			1568.67			1.04251
	Mock 495	1574.26	1632.59	1509.15	1473.26	1311.91	1454.03	1186.28	1310.66	1530.25	1634.37			1449.17		0.926332
	PTX 495	865.737	1299.39	1401.49	1155.83	1592.78	801.688	1147.61	1448.96	1522.08	1453.2	1291.97	1651.51	1342.41
	Mock 329 495	1651.85	1474.27	936.258	1467.83	1239.43	1750.13	1935.86	1222.33	827.718	1524.22	1052.27		1343.03		1.04251
	PTX 329 495	1654.47	1364.23	1141.74	1714.56	1400.37	1983.36	1228.07	1418.19	919.215	1850.99	980.467		1400.12
	25-05-21
	Mock Ctr	2156.29	1875.98	2306.93	1814.38	2357.03	2004.5	2076.31						2072.52		0.829498	0.829498
	PTX Ctr	1584.73	1709.9	1774.68	1542.22	1795.14	1773.82							1719.15			0.766913
	Mock 329	1744.64	2096.84	1809.06	1732.91	1944.45	1831.76							1883.01		0.766913	0.834335
	PTX 329	1511.37	1390.98	1412.73	1662.02	1223.16	1416.42	1559.3						1444.1			0.956688
	Mock 495	1354.86	1386.8	1607.9	1568.87	1413.9	1485.33							1492.56		0.834335
	PTX 495	751.385	604.877	1069.13	1386.8	1155.61	1492.87	1300.97	1277.24	1225.83	1694.32			1245.29
	Mock 329 495	613.036	900.648	946.35	1044.68	1108.46	2373.3	1485.92	1196.72	1731.26				1348.42		0.956688
	PTX 329 495	1361.5	1286.77	1174.51	1462.52	1103.6	1258.66	1239.72	1504.33					1290.01

## Sheet: 3G
	(-)				(-)				Ctr pLNA				Ctr pLNA				(-)				(-)				Ctr pLNA				Ctr pLNA				329 pLNA				329 pLNA				(-)				(-)				Ctr pLNA
	0.087732	0.203334	0.096329	0.218915	0.073668	0.115083	0.085677	0.107677	0.211514	0.106156	0.097364	0.210239	0.130118	0.146338	0.105413	0.13453	0.48564	0.424321	0.473145	0.475492	0.670724	0.560674	0.760301	0.490589	0.424377	0.530347	0.546679	0.535121	0.632012	0.629499	0.759053	0.54082	0.345238	0.33658	0.434932	0.246605	0.286559	0.37433	0.252053	0.155271	0.225212	0.378977	0.538299	0.356332	0.447849	0.528181	0.659184	0.451599	0.145014
	pTracer dual color rep1
						Proportion GFP only
		329 Ctr pLNA Mock				329 Ctr pLNA Mock					Ctr Mock			Average
	GFP only (+)	54	61	50		0.372414	0.462121	0.438596			0.0754717	0.056338	0.131387	0.0877322
	dsRed+ (-)	91	71	64
	total	145	132	114							Ctr PTX
		329 Ctr pLNA PTX				329 Ctr pLNA PTX					0.0941704	0.0558659	0.0709677	0.073668
		49	115	93		0.604938	0.649718	0.641379
		32	62	52							Ctr Ctr pLNA Mock
		81	177	145							0.202429	0.228723	0.20339	0.211514
		329 329 pLNA Mock				329 329 pLNA Mock
		32	18	18		0.457143	0.257143	0.321429			Ctr Ctr pLNA PTX
		38	52	38							0.14876	0.0704225	0.171171	0.130118
		70	70	56
		329 329 pLNA PTX				329 329 pLNA PTX					329 Mock
		40	23	26		0.4	0.25	0.209677			0.619883	0.328704	0.508333	0.48564
		60	69	98
		100	92	124							329 PTX
		495 495 pLNA Mock				495 495 pLNA Mock					0.61039	0.653179	0.748603	0.670724
		27	55	30		0.182432	0.201465	0.191083
		121	218	127							329 Ctr pLNA Mock
		148	273	157							0.372414	0.462121	0.438596	0.424377
		495 495 pLNA PTX				495 495 pLNA PTX
		62	22	40		0.266094	0.174603	0.126582			329 Ctr pLNA PTX
		171	104	276							0.604938	0.649718	0.641379	0.632012
		233	126	316
		329 Mock				329 Mock					329 329 pLNA Mock
		106	71	61		0.619883	0.328704	0.508333			0.457143	0.257143	0.321429	0.345238
		65	145	59
		171	216	120							329 329 pLNA PTX
		329 PTX				329 PTX					0.4	0.25	0.209677	0.286559
		47	113	134		0.61039	0.653179	0.748603
		30	60	45							495 Mock
		77	173	179							0.276265	0.256513	0.142857	0.225212
		495 Ctr pLNA Mock				495 Ctr pLNA Mock
		97	46	34		0.164407	0.127778	0.142857			495 PTX
		493	314	204							0.457207	0.395833	0.490506	0.447849
		590	360	238
		495 Ctr pLNA PTX				495 Ctr pLNA PTX					495 Ctr pLNA Mock
		276	167	134		0.456198	0.397619	0.492647			0.164407	0.127778	0.142857	0.145014
		329	253	138
		605	420	272							495 Ctr pLNA PTX
		495 Mock				495 Mock					0.456198	0.397619	0.492647	0.448821
		71	128	36		0.276265	0.256513	0.142857
		186	371	216							495 495 pLNA Mock
		257	499	252							0.182432	0.201465	0.191083	0.19166
		495 PTX				495 PTX
		203	57	155		0.457207	0.395833	0.490506			495 495 pLNA PTX
		241	87	161							0.266094	0.174603	0.126582	0.189093
		444	144	316
		Ctr Ctr pLNA Mock				Ctr Ctr pLNA Mock
		50	43	24		0.202429	0.228723	0.20339
		197	145	94
		247	188	118
		Ctr Ctr pLNA PTX				Ctr Ctr pLNA PTX
		18	10	38		0.14876	0.0704225	0.171171
		103	132	184
		121	142	222
		Ctr Mock				Ctr Mock
		16	8	18		0.0754717	0.056338	0.131387
		196	134	119
		212	142	137
		Ctr PTX				Ctr PTX
		21	10	11		0.0941704	0.0558659	0.0709677
		202	169	144
		223	179	155
	pTracer dual color rep2
		329 Ctr pLNA Mock				329 Ctr pLNA Mock					Ctr Mock
	GFP only (+)	75	46	74		0.663717	0.484211	0.443114			0.237113	0.178771	0.194118	0.203334
	dsRed+ (-)	38	49	93
		113	95	167
		329 Ctr pLNA PTX				329 Ctr pLNA PTX					Ctr PTX
		121	85	90		0.643617	0.648855	0.596026			0.132979	0.139423	0.0728477	0.115083
		67	46	61
		188	131	151
		329 329 pLNA Mock				329 329 pLNA Mock					Ctr Ctr pLNA Mock
		57	26	24		0.428571	0.295455	0.285714			0.126437	0.0909091	0.101124	0.106156
		76	62	60
		133	88	84
		329 329 pLNA PTX				329 329 pLNA PTX					Ctr Ctr pLNA PTX
		28	40	50		0.368421	0.366972	0.387597			0.153374	0.126761	0.158879	0.146338
		48	69	79
		76	109	129
		495 495 pLNA Mock				495 495 pLNA Mock					329 Mock
		135	241	180		0.233969	0.315858	0.308748			0.47541	0.391304	0.40625	0.424321
		442	522	403
		577	763	583
		495 495 pLNA PTX				495 495 pLNA PTX					329 PTX
		145	57	36		0.304622	0.213483	0.184615			0.558559	0.553571	0.569892	0.560674
		331	210	159
		476	267	195
		329 Mock				329 Mock					329 Ctr pLNA Mock
		58	27	39		0.47541	0.391304	0.40625			0.663717	0.484211	0.443114	0.530347
		64	42	57
		122	69	96
		329 PTX				329 PTX					329 Ctr pLNA PTX
		62	93	53		0.558559	0.553571	0.569892			0.643617	0.648855	0.596026	0.629499
		49	75	40
		111	168	93
		495 Ctr pLNA Mock				495 Ctr pLNA Mock					329 329 pLNA Mock
		98	91	79		0.566474	0.464286	0.385366			0.428571	0.295455	0.285714	0.33658
		75	105	126
		173	196	205
		495 Ctr pLNA PTX				495 Ctr pLNA PTX					329 329 pLNA PTX
		126	184	137		0.575342	0.519774	0.593074			0.368421	0.366972	0.387597	0.37433
		93	170	94
		219	354	231
		495 Mock				495 Mock					495 Mock
		117	82	143		0.39527	0.338843	0.402817			0.39527	0.338843	0.402817	0.378977
		179	160	212
		296	242	355
		495 PTX				495 PTX					495 PTX
		125	191	188		0.457875	0.5	0.626667			0.457875	0.5	0.626667	0.528181
		148	191	112
		273	382	300
		Ctr Ctr pLNA Mock				Ctr Ctr pLNA Mock					495 Ctr pLNA Mock
		11	8	18		0.126437	0.0909091	0.101124			0.566474	0.464286	0.385366	0.472042
		76	80	160
		87	88	178
		Ctr Ctr pLNA PTX				Ctr Ctr pLNA PTX					495 Ctr pLNA PTX
		25	27	34		0.153374	0.126761	0.158879			0.575342	0.519774	0.593074	0.56273
		138	186	180
		163	213	214
		Ctr Mock				Ctr Mock					495 495 pLNA Mock
		46	32	33		0.237113	0.178771	0.194118			0.233969	0.315858	0.308748	0.286192
		148	147	137
		194	179	170
		Ctr PTX				Ctr PTX					495 495 pLNA PTX
		50	29	11		0.132979	0.139423	0.0728477			0.304622	0.213483	0.184615	0.23424
		326	179	140
		376	208	151
	pTracer dual color rep3
		Ctr sensor Mock				Ctr sensor Mock
	GFP only (+)	40	11	24		0.116618	0.0723684	0.1	0.0963288			Ctr Mock	0.0963288
	dsRed+ (-)	303	141	216								Ctr PTX	0.0856766
		343	152	240								Ctr Ctr pLNA Mock	0.0973638
		Ctr sensor PTX				Ctr sensor PTX						Ctr Ctr pLNA PTX	0.105413
		11	18	18		0.0438247	0.0818182	0.131387	0.0856766			329 Mock	0.473145
		240	202	119								329 PTX	0.760301
		251	220	137								329 Ctr pLNA Mock	0.546679
		Ctr sensor Ctr pLNA Mock				Ctr sensor Ctr pLNA Mock						329 Ctr pLNA PTX	0.759053
		22	12	17		0.103286	0.0754717	0.113333	0.0973638			329 329 pLNA Mock	0.434932
		191	147	133								329 329 pLNA PTX	0.252053
		213	159	150								495 Mock	0.538299
		Ctr sensor Ctr pLNA PTX				Ctr sensor Ctr pLNA PTX						495 PTX	0.659184
		31	9	27		0.14486	0.0633803	0.108	0.105413			495 Ctr pLNA Mock	0.425683
		183	133	223								495 Ctr pLNA PTX	0.550177
		214	142	250								495 495 pLNA Mock	0.29631
		329 sensor Mock				329 sensor Mock						495 495 pLNA PTX	0.237775
		69	35	43		0.638889	0.318182	0.462366	0.473145
		39	75	50
		108	110	93
		329 sensor PTX				329 sensor PTX
		82	82	62		0.745455	0.788462	0.746988	0.760301
		28	22	21
		110	104	83
		329 sensor Ctr pLNA Mock				329 sensor Ctr pLNA Mock
		50	43	51		0.595238	0.52439	0.520408	0.546679
		34	39	47
		84	82	98
		329 sensor Ctr pLNA PTX				329 sensor Ctr pLNA PTX
		90	104	107		0.810811	0.707483	0.758865	0.759053
		21	43	34
		111	147	141
		329 sensor 329 pLNA Mock				329 sensor 329 pLNA Mock
		43	55	44		0.37069	0.561224	0.372881	0.434932
		73	43	74
		116	98	118
		329 sensor 329 pLNA PTX				329 sensor 329 pLNA PTX
		20	27	29		0.17094	0.27	0.315217	0.252053
		97	73	63
		117	100	92
		495 sensor Mock				495 sensor Mock
		139	113	102		0.520599	0.576531	0.517766	0.538299
		128	83	95
		267	196	197
		495 sensor PTX				495 sensor PTX
		172	108	163		0.644195	0.662577	0.670782	0.659184
		95	55	80
		267	163	243
		495 sensor Ctr pLNA Mock				495 sensor Ctr pLNA Mock
		199	71	90		0.554318	0.369792	0.352941	0.425683
		160	121	165
		359	192	255
		495 sensor Ctr pLNA PTX				495 sensor Ctr pLNA PTX
		195	106	152		0.560345	0.554974	0.535211	0.550177
		153	85	132
		348	191	284
		495 sensor 495 pLNA Mock				495 sensor 495 pLNA Mock
		85	60	39		0.348361	0.3125	0.22807	0.29631
		159	132	132
		244	192	171
		495 sensor 495 pLNA PTX				495 sensor 495 pLNA PTX
		56	31	29		0.314607	0.198718	0.2	0.237775
		122	125	116
		178	156	145
	pTracer dual color rep4
		Ctr sensor Mock				Ctr sensor Mock
	GFP only (+)	16	16	17		0.181818	0.141593	0.333333	0.218915			Ctr Mock	0.218915
	dsRed+ (-)	72	97	34								Ctr PTX	0.107677
	total count	88	113	51								Ctr Ctr pLNA Mock	0.210239
		Ctr sensor PTX				Ctr sensor PTX						Ctr Ctr pLNA PTX	0.13453
		11	16	14		0.0774648	0.134454	0.111111	0.107677			329 Mock	0.475492
		131	103	112								329 PTX	0.490589
		142	119	126								329 Ctr pLNA Mock	0.535121
		Ctr sensor Ctr pLNA Mock				Ctr sensor Ctr pLNA Mock						329 Ctr pLNA PTX	0.54082
		10	24	17		0.144928	0.315789	0.17	0.210239			329 329 pLNA Mock	0.246605
		59	52	83								329 329 pLNA PTX	0.155271
		69	76	100								495 Mock	0.356332
		Ctr sensor Ctr pLNA PTX				Ctr sensor Ctr pLNA PTX						495 PTX	0.451599
		11	20	9		0.166667	0.16	0.0769231	0.13453			495 Ctr pLNA Mock	0.359563
		55	105	108								495 Ctr pLNA PTX	0.552023
		66	125	117								495 495 pLNA Mock	0.286484
		329 sensor Mock				329 sensor Mock						495 495 pLNA PTX	0.227506
		60	33	44		0.491803	0.515625	0.419048	0.475492
		62	31	61
		122	64	105
		329 sensor PTX				329 sensor PTX
		111	79	70		0.45122	0.541096	0.479452	0.490589
		135	67	76
		246	146	146
		329 sensor Ctr pLNA Mock				329 sensor Ctr pLNA Mock
		63	43	51		0.533898	0.581081	0.490385	0.535121
		55	31	53
		118	74	104
		329 sensor Ctr pLNA PTX				329 sensor Ctr pLNA PTX
		109	58	58		0.564767	0.5	0.557692	0.54082
		84	58	46
		193	116	104
		329 sensor 329 pLNA Mock				329 sensor 329 pLNA Mock
		24	23	8		0.342857	0.261364	0.135593	0.246605
		46	65	51
		70	88	59
		329 sensor 329 pLNA PTX				329 sensor 329 pLNA PTX
		12	24	5		0.164384	0.20339	0.0980392	0.155271
		61	94	46
		73	118	51
		495 sensor Mock				495 sensor Mock
		40	21	36		0.338983	0.33871	0.391304	0.356332
		78	41	56
		118	62	92
		495 sensor PTX				495 sensor PTX
		40	58	27		0.519481	0.460317	0.375	0.451599
		37	68	45
		77	126	72
		495 sensor Ctr pLNA Mock				495 sensor Ctr pLNA Mock
		16	22	25		0.4	0.305556	0.373134	0.359563
		24	50	42
		40	72	67
		495 sensor Ctr pLNA PTX				495 sensor Ctr pLNA PTX
		67	89	52		0.536	0.566879	0.553191	0.552023
		58	68	42
		125	157	94
		495 sensor 495 pLNA Mock				495 sensor 495 pLNA Mock
		21	29	21		0.269231	0.337209	0.253012	0.286484
		57	57	62
		78	86	83
		495 sensor 495 pLNA PTX				495 sensor 495 pLNA PTX
		33	13	16		0.240876	0.206349	0.235294	0.227506
		104	50	52
		137	63	68
			Rep1	Rep2	Rep3	Rep4
		Ctr Mock	0.0877322	0.203334	0.0963288	0.218915
		Ctr PTX	0.073668	0.115083	0.0856766	0.107677
		Ctr Ctr pLNA Mock	0.211514	0.106156	0.0973638	0.210239
		Ctr Ctr pLNA PTX	0.130118	0.146338	0.105413	0.13453
		329 Mock	0.48564	0.424321	0.473145	0.475492
		329 PTX	0.670724	0.560674	0.760301	0.490589
		329 Ctr pLNA Mock	0.424377	0.530347	0.546679	0.535121
		329 Ctr pLNA PTX	0.632012	0.629499	0.759053	0.54082
		329 329 pLNA Mock	0.345238	0.33658	0.434932	0.246605
		329 329 pLNA PTX	0.286559	0.37433	0.252053	0.155271
		495 Mock	0.225212	0.378977	0.538299	0.356332
		495 PTX	0.447849	0.528181	0.659184	0.451599
		495 Ctr pLNA Mock	0.145014	0.472042	0.425683	0.359563
		495 Ctr pLNA PTX	0.448821	0.56273	0.550177	0.552023
		495 495 pLNA Mock	0.19166	0.286192	0.29631	0.286484
		495 495 pLNA PTX	0.189093	0.23424	0.237775	0.227506
[truncated: 15 more columns]

## Sheet: 3H and I
	Well	Fluor	Target	Content	Sample	Cq	SQ
	A01	SYBR	U6	1	PC	23.4824				U6	PC1	23.6861		495	PC1	24.3665	0.6804	0.623992				Mock Cell Body	0.125782	0.0924018	0.117776	CELL BODY	4.9609	1.89399	1.26049				CELL BODY
	A02	SYBR	U6	1	PD	24.0729					PD1	24.2178			PD1	23.6263	-0.591431	1.50674				Mock Dendrite	0.716576	1.36437	0.848931									miR-329			miR-495
	A03	SYBR	U6	1	CC	22.1875					CC1	22.1956			CC1	25.1866	2.991	0.125782				PTX Cell Body	0.623992	0.175008	0.148455	DENDRITE	2.10269	1.45422	1.19185					Rep1	Rep2	Rep3	Rep1	Rep2	Rep3
	A04	SYBR	U6	1	CD	23.2553					CD1	23.5031			CD1	23.984	0.480808	0.716576				PTX Dendrite	1.50674	1.98409	1.01179								PTX/Mock	2.59554	1.62836	0.883015	4.9609	1.89399	1.26049
	A05	SYBR	U6	2	PC	22.0963
	A06	SYBR	U6	2	PD	25.071					PC2	22.3658			PC2	24.8803	2.5145	0.175008				Mock Cell Body	0.0924018										DENDRITES
	A07	SYBR	U6	2	CC	22.1973					PD2	25.3561			PD2	24.3677	-0.988481	1.98409				Mock Dendrite	1.36437											miR-329			miR-495
	A08	SYBR	U6	2	CD	24.2494					CC2	22.3303			CC2	25.7663	3.43594	0.0924018				PTX Cell Body	0.175008											Rep1	Rep2	Rep3	Rep1	Rep2	Rep3
	A09	SYBR	U6	3	PC	22.3625					CD2	24.5563			CD2	24.108	-0.44823	1.36437				PTX Dendrite	1.98409										PTX/Mock	1.35079	0.809265	0.7389	2.10269	1.45423	1.19185
	A10	SYBR	U6	3	PD	23.799
	A11	SYBR	U6	3	CC	22.269					PC3	22.5992			PC3	25.3511	2.7519	0.148455				Mock Cell Body	0.117776
	A12	SYBR	U6	3	CD	24.0966					PD3	24.0664			PD3	24.0495	-0.0169156	1.01179				Mock Dendrite	0.848931
	A13	SYBR	U6	Unkn								22.4505				25.5364	3.08589	0.117776				PTX Cell Body												Rep1	Rep2	Rep3	Rep1	Rep2	Rep3
	A14	SYBR	U6	Unkn		38.6381						24.3726				24.6089	0.236281	0.848931				PTX Dendrite											PTX/Mock	1.35079	0.809265	0.7389	2.10269	1.45423	1.19185
	A15	SYBR	U6	Unkn								#DIV/0!				#DIV/0!	#DIV/0!	#DIV/0!							0.148455
	A16	SYBR	U6	Unkn								38.6381				#DIV/0!	#DIV/0!	#DIV/0!							1.01179
	A17	SYBR	U6	Unkn								#DIV/0!				#DIV/0!	#DIV/0!	#DIV/0!
	A18	SYBR	U6	Unkn								#DIV/0!				#DIV/0!	#DIV/0!	#DIV/0!
	A19	SYBR	U6	Unkn								#DIV/0!				#DIV/0!	#DIV/0!	#DIV/0!
	A20	SYBR	U6	Unkn								#DIV/0!				#DIV/0!	#DIV/0!	#DIV/0!
	A21	SYBR	U6	Unkn								#DIV/0!			CD2	#DIV/0!	#DIV/0!	#DIV/0!
	A22	SYBR	U6	Unkn								#DIV/0!				#DIV/0!	#DIV/0!	#DIV/0!
	A23	SYBR	U6	Unkn								#DIV/0!			PC3	#DIV/0!	#DIV/0!	#DIV/0!
	A24	SYBR	U6	Unkn								#DIV/0!			PD3	24.0495	#DIV/0!	#DIV/0!
	B01	SYBR	U6	1	PC	23.8601					CC3	22.4505			CC3	25.5364	3.08589	0.117776				PTX Cell Body	0.148455
	B02	SYBR	U6	1	PD	24.327					CD3	24.3726			CD3	24.6089	0.236281	0.848931				PTX Dendrite	1.01179
	B03	SYBR	U6	1	CC	22.266
	B04	SYBR	U6	1	CD	23.5301
	B05	SYBR	U6	2	PC	22.514
	B06	SYBR	U6	2	PD	25.5249								329	PC1	29.2663	5.58015	0.0209029				Mock Cell Body	0.00805343	0.00658298	0.0109373	CELL BODY	2.59553	1.62836	0.88301
	B07	SYBR	U6	2	CC	22.565									PD1	27.8821	3.66434	0.0788719				Mock Dendrite	0.0583893	0.122982	0.0809442
	B08	SYBR	U6	2	CD	24.7633									CC1	29.1518	6.95618	0.00805343				PTX Cell Body	0.0209029	0.0107195	0.00965776	DENDRITE	1.35079	0.809265	0.738901
	B09	SYBR	U6	3	PC	22.76									CD1	27.6013	4.09815	0.0583893				PTX Dendrite	0.0788719	0.0995254	0.0598097
	B10	SYBR	U6	3	PD	24.2804
	B11	SYBR	U6	3	CC	22.6533									PC2	28.9094	6.54362	0.0107195
	B12	SYBR	U6	3	CD	24.6237									PD2	28.6849	3.32879	0.0995254
	B13	SYBR	U6	Unkn											CC2	29.5774	7.24704	0.00658298
	B14	SYBR	U6	Unkn											CD2	27.5797	3.02348	0.122982
	B15	SYBR	U6	Unkn													0	1
	B16	SYBR	U6	Unkn											PC3	29.2933	6.6941	0.00965776
	B17	SYBR	U6	Unkn											PD3		-24.0664	1.75671e+07
	B18	SYBR	U6	Unkn													-22.4505	5.73154e+06
	B19	SYBR	U6	Unkn													-24.3726	2.17214e+07
	B20	SYBR	U6	Unkn													#DIV/0!	#DIV/0!
	B21	SYBR	U6	Unkn													-38.6381	4.27788e+11
	B22	SYBR	U6	Unkn													#DIV/0!	#DIV/0!
	B23	SYBR	U6	Unkn												28.9094	#DIV/0!	#DIV/0!
	B24	SYBR	U6	Unkn												28.6849	#DIV/0!	#DIV/0!
	C01	SYBR	U6	1	PC	23.716									CC2	29.5774	7.24704	0.00658298
	C02	SYBR	U6	1	PD	24.2534									CD2	27.5797	3.02348	0.122982
	C03	SYBR	U6	1	CC	22.1333
	C04	SYBR	U6	1	CD	23.724									PC3	29.2933	6.6941	0.00965776
	C05	SYBR	U6	2	PC	22.487									PD3	28.1298	4.06348	0.0598097
	C06	SYBR	U6	2	PD	25.4726									CC3	28.9651	6.5146	0.0109373
	C07	SYBR	U6	2	CC	22.2287									CD3	27.9995	3.62693	0.0809442
	C08	SYBR	U6	2	CD	24.6561
	C09	SYBR	U6	3	PC	22.6751
	C10	SYBR	U6	3	PD	24.1197
	C11	SYBR	U6	3	CC	22.4292
	C12	SYBR	U6	3	CD	24.3976
	C13	SYBR		Unkn
	C14	SYBR		Unkn
	C15	SYBR		Unkn
	C16	SYBR		Unkn
	C17	SYBR		Unkn
	C18	SYBR		Unkn
	C19	SYBR		Unkn
	C20	SYBR		Unkn
	C21	SYBR		Unkn
	C22	SYBR		Unkn
	C23	SYBR		Unkn
	C24	SYBR		Unkn
	D01	SYBR	495	1	PC	24.2732
	D02	SYBR	495	1	PD	23.5033
	D03	SYBR	495	1	CC	25.0553
	D04	SYBR	495	1	CD	23.9016
	D05	SYBR	495	2	PC	24.8134
	D06	SYBR	495	2	PD	24.0837
	D07	SYBR	495	2	CC	25.6122
	D08	SYBR	495	2	CD	24.016
	D09	SYBR	495	3	PC	25.2064
	D10	SYBR	495	3	PD	24.003
	D11	SYBR	495	3	CC	25.3563
	D12	SYBR	495	3	CD	24.4899
	D13	SYBR	495	Unkn
	D14	SYBR	495	Unkn
	D15	SYBR	495	Unkn
	D16	SYBR	495	Unkn
	D17	SYBR	495	Unkn
	D18	SYBR	495	Unkn
	D19	SYBR	495	Unkn
	D20	SYBR	495	Unkn
	D21	SYBR	495	Unkn
	D22	SYBR	495	Unkn
	D23	SYBR	495	Unkn
	D24	SYBR	495	Unkn
	E01	SYBR	495	1	PC	24.2979
	E02	SYBR	495	1	PD	23.5538
	E03	SYBR	495	1	CC	25.1596
	E04	SYBR	495	1	CD	23.9162
	E05	SYBR	495	2	PC	24.7749
	E06	SYBR	495	2	PD	24.3769
	E07	SYBR	495	2	CC	25.6366
	E08	SYBR	495	2	CD	24.0269
	E09	SYBR	495	3	PC	25.3427
	E10	SYBR	495	3	PD	23.8898
	E11	SYBR	495	3	CC	25.4803
	E12	SYBR	495	3	CD	24.48
	E13	SYBR	495	Unkn
	E14	SYBR	495	Unkn
	E15	SYBR	495	Unkn
	E16	SYBR	495	Unkn
	E17	SYBR	495	Unkn
	E18	SYBR	495	Unkn
	E19	SYBR	495	Unkn
	E20	SYBR	495	Unkn
	E21	SYBR	495	Unkn
	E22	SYBR	495	Unkn
	E23	SYBR	495	Unkn
	E24	SYBR	495	Unkn
	F01	SYBR	495	1	PC	24.5285
	F02	SYBR	495	1	PD	23.8219
	F03	SYBR	495	1	CC	25.3449
	F04	SYBR	495	1	CD	24.134
	F05	SYBR	495	2	PC	25.0526
	F06	SYBR	495	2	PD	24.6424
	F07	SYBR	495	2	CC	26.0499
	F08	SYBR	495	2	CD	24.2812
	F09	SYBR	495	3	PC	25.5043
	F10	SYBR	495	3	PD	24.2556
	F11	SYBR	495	3	CC	25.7726
	F12	SYBR	495	3	CD	24.8568
	F13	SYBR		Unkn
	F14	SYBR		Unkn
	F15	SYBR		Unkn
	F16	SYBR		Unkn
	F17	SYBR		Unkn
	F18	SYBR		Unkn
	F19	SYBR		Unkn
	F20	SYBR		Unkn
	F21	SYBR		Unkn
	F22	SYBR		Unkn
	F23	SYBR		Unkn
	F24	SYBR		Unkn
	G01	SYBR		Unkn
	G02	SYBR		Unkn
	G03	SYBR		Unkn
	G04	SYBR		Unkn
	G05	SYBR		Unkn
	G06	SYBR		Unkn
	G07	SYBR		Unkn
	G08	SYBR		Unkn
	G09	SYBR		Unkn
	G10	SYBR		Unkn
	G11	SYBR		Unkn
	G12	SYBR		Unkn
	G13	SYBR		Unkn
	G14	SYBR		Unkn
	G15	SYBR		Unkn
	G16	SYBR		Unkn
	G17	SYBR		Unkn
	G18	SYBR		Unkn
	G19	SYBR		Unkn
	G20	SYBR		Unkn
	G21	SYBR		Unkn
	G22	SYBR		Unkn
	G23	SYBR		Unkn
	G24	SYBR		Unkn
	H01	SYBR		Unkn
	H02	SYBR		Unkn
	H03	SYBR		Unkn
	H04	SYBR		Unkn
	H05	SYBR		Unkn
	H06	SYBR		Unkn
	H07	SYBR		Unkn
	H08	SYBR		Unkn
	H09	SYBR		Unkn
	H10	SYBR		Unkn
	H11	SYBR		Unkn
	H12	SYBR		Unkn
	H13	SYBR		Unkn
	H14	SYBR		Unkn
	H15	SYBR		Unkn
	H16	SYBR		Unkn
	H17	SYBR		Unkn
	H18	SYBR		Unkn
	H19	SYBR		Unkn
	H20	SYBR		Unkn
	H21	SYBR		Unkn
	H22	SYBR		Unkn
	H23	SYBR		Unkn
	H24	SYBR		Unkn
	I01	SYBR		Unkn
	I02	SYBR		Unkn
	I03	SYBR		Unkn
	I04	SYBR		Unkn
	I05	SYBR		Unkn
	I06	SYBR		Unkn
	I07	SYBR		Unkn
	I08	SYBR		Unkn
	I09	SYBR		Unkn
	I10	SYBR		Unkn
	I11	SYBR		Unkn
	I12	SYBR		Unkn
	I13	SYBR		Unkn
	I14	SYBR		Unkn
	I15	SYBR		Unkn
	I16	SYBR		Unkn
	I17	SYBR		Unkn
	I18	SYBR		Unkn
	I19	SYBR		Unkn
	I20	SYBR		Unkn
	I21	SYBR		Unkn
	I22	SYBR		Unkn
	I23	SYBR		Unkn
	I24	SYBR		Unkn
	J01	SYBR		Unkn
	J02	SYBR		Unkn
	J03	SYBR		Unkn
	J04	SYBR		Unkn
	J05	SYBR		Unkn
	J06	SYBR		Unkn
	J07	SYBR		Unkn
	J08	SYBR		Unkn
	J09	SYBR		Unkn
	J10	SYBR		Unkn
	J11	SYBR		Unkn
	J12	SYBR		Unkn
	J13	SYBR		Unkn
	J14	SYBR		Unkn
	J15	SYBR		Unkn
	J16	SYBR		Unkn
	J17	SYBR		Unkn
	J18	SYBR		Unkn
	J19	SYBR		Unkn
	J20	SYBR		Unkn
	J21	SYBR		Unkn
	J22	SYBR		Unkn
	J23	SYBR		Unkn
	J24	SYBR		Unkn
	K01	SYBR		Unkn
	K02	SYBR		Unkn
	K03	SYBR		Unkn
	K04	SYBR		Unkn
	K05	SYBR		Unkn
	K06	SYBR		Unkn
	K07	SYBR		Unkn
	K08	SYBR		Unkn
	K09	SYBR		Unkn
	K10	SYBR		Unkn
	K11	SYBR		Unkn
	K12	SYBR		Unkn
	K13	SYBR		Unkn
	K14	SYBR		Unkn
	K15	SYBR		Unkn
	K16	SYBR		Unkn
	K17	SYBR		Unkn
	K18	SYBR		Unkn
	K19	SYBR		Unkn
	K20	SYBR		Unkn
	K21	SYBR		Unkn
	K22	SYBR		Unkn
	K23	SYBR		Unkn
	K24	SYBR		Unkn
	L01	SYBR		Unkn
	L02	SYBR		Unkn
	L03	SYBR		Unkn
	L04	SYBR		Unkn
	L05	SYBR		Unkn
	L06	SYBR		Unkn
	L07	SYBR		Unkn
	L08	SYBR		Unkn
	L09	SYBR		Unkn
	L10	SYBR		Unkn
	L11	SYBR		Unkn
	L12	SYBR		Unkn
	L13	SYBR		Unkn
	L14	SYBR		Unkn
	L15	SYBR		Unkn
	L16	SYBR		Unkn
	L17	SYBR		Unkn
	L18	SYBR		Unkn
	L19	SYBR		Unkn
	L20	SYBR		Unkn
	L21	SYBR		Unkn
	L22	SYBR		Unkn
	L23	SYBR		Unkn
	L24	SYBR		Unkn
	M01	SYBR		Unkn
	M02	SYBR		Unkn
	M03	SYBR		Unkn
	M04	SYBR		Unkn
	M05	SYBR		Unkn
	M06	SYBR		Unkn
	M07	SYBR		Unkn
	M08	SYBR		Unkn
	M09	SYBR		Unkn
	M10	SYBR		Unkn
	M11	SYBR		Unkn
	M12	SYBR		Unkn
	M13	SYBR		Unkn
	M14	SYBR		Unkn
	M15	SYBR		Unkn
	M16	SYBR		Unkn
	M17	SYBR		Unkn
	M18	SYBR		Unkn
	M19	SYBR		Unkn
	M20	SYBR		Unkn
	M21	SYBR		Unkn
	M22	SYBR		Unkn
	M23	SYBR		Unkn
	M24	SYBR		Unkn
	N01	SYBR		Unkn
	N02	SYBR		Unkn
	N03	SYBR		Unkn
	N04	SYBR		Unkn
	N05	SYBR		Unkn
	N06	SYBR		Unkn
	N07	SYBR		Unkn
	N08	SYBR		Unkn
	N09	SYBR		Unkn
	N10	SYBR		Unkn
	N11	SYBR		Unkn
	N12	SYBR		Unkn
	N13	SYBR		Unkn
	N14	SYBR		Unkn
	N15	SYBR		Unkn
	N16	SYBR		Unkn
	N17	SYBR		Unkn
	N18	SYBR		Unkn
	N19	SYBR		Unkn
	N20	SYBR		Unkn
	N21	SYBR		Unkn
	N22	SYBR		Unkn
	N23	SYBR		Unkn
	N24	SYBR		Unkn
	O01	SYBR		Unkn
	O02	SYBR		Unkn
	O03	SYBR		Unkn
	O04	SYBR		Unkn
	O05	SYBR		Unkn
	O06	SYBR		Unkn
	O07	SYBR		Unkn
	O08	SYBR		Unkn
	O09	SYBR		Unkn
	O10	SYBR		Unkn
	O11	SYBR		Unkn
	O12	SYBR		Unkn
	O13	SYBR		Unkn
	O14	SYBR		Unkn
	O15	SYBR		Unkn
	O16	SYBR		Unkn
	O17	SYBR		Unkn
	O18	SYBR		Unkn
	O19	SYBR		Unkn
	O20	SYBR		Unkn
	O21	SYBR		Unkn
	O22	SYBR		Unkn
	O23	SYBR		Unkn
	O24	SYBR		Unkn
	P01	SYBR		Unkn
	P02	SYBR		Unkn
	P03	SYBR		Unkn
	P04	SYBR		Unkn
	P05	SYBR		Unkn
	P06	SYBR		Unkn
	P07	SYBR		Unkn
	P08	SYBR		Unkn
	P09	SYBR		Unkn
	P10	SYBR		Unkn
	P11	SYBR		Unkn
	P12	SYBR		Unkn
	P13	SYBR		Unkn
	P14	SYBR		Unkn
	P15	SYBR		Unkn
	P16	SYBR		Unkn
	P17	SYBR		Unkn
	P18	SYBR		Unkn
	P19	SYBR		Unkn
	P20	SYBR		Unkn
	P21	SYBR		Unkn
	P22	SYBR		Unkn
	P23	SYBR		Unkn
	P24	SYBR		Unkn
