# Supplementary material for: miR-329– and miR-495–mediated Prr7 down-regulation is required for homeostatic synaptic depression in rat hippocampal neurons
Source: Life Sci Alliance. 2022 Sep 23;5(12):e202201520. doi: 10.26508/lsa.202201520 (PMC9510147; doi:10.26508/lsa.202201520)
Supplement: Supplementary file 7 [file LSA-2022-01520_SdataF4.1.xlsx]

## Sheet: 4A
	Ctr pLNA			329 pLNA			495 pLNA			329/495 pLNA
	Rep1	Rep2	Rep3	Rep1	Rep2	Rep3	Rep1	Rep2	Rep3	Rep1	Rep2	Rep3
PTX/Mock	0.758173	0.835931	0.780262	0.96064	0.873353	1.00103	1.14521	1.02077	1.00131	1.07348	1.04372	1.09062
	pLNA spine analysis
	19-08-20
	Mock 329 pLNA	Dendrite length		Count	Count/Length	Average			Mock 329 pLNA	Mock 495 pLNA	Mock 329/495 pLNA	Mock Ctr pLNA	PTX 329 pLNA	PTX 495 pLNA	PTX 329/495 pLNA	PTX Ctr pLNA
	1	82.171	118.588	111	0.936014	0.897262			0.897262	1.40631	1.5416	1.35906	1.00634	1.13608	1.16294	1.20365
		36.417							1.44532	1.41899	1.49592	1.56376	1.40924	1.21221	1.34775	0.996328
		82.924	157.249	135	0.858511				1.43772	1.54626	1.46235	1.49758	0.983962	1.44689	1.20553	0.745927
		74.325							0.860288	1.16152	1.27892	1.19211	1.19202	1.39008	1.22958	1.22998
	2	88.896	171.943	239	1.39	1.44532			0.890404	1.39071	1.06908	1.08875	1.49701	1.35484	1.22595	1.20564
		83.047							1.37755	1.26232	0.817707	1.18628	1.14101	1.40535	1.29936	0.956378
		91.794	193.25	290	1.50065				1.39825	1.28383	1.46061	1.13116	1.12416	1.33565	1.69343	0.84353
		101.456							1.38193	1.24553	0.966772	1.26056	1.34497	1.5331	1.8737	0.839076
	3	82.303	145.582	203	1.3944	1.43772				1.4346	1.29318
		63.279						averages	1.21109	1.35001	1.26513	1.28491	1.21234	1.35177	1.37978	1.00256
		80.198	220.116	326	1.48104
		139.918
	4	55.646	153.904	124	0.805697	0.860288
		98.258
		87.405	186.91	171	0.914879
		99.505
	5	142.267	261.699	274	1.047	0.890404
		119.432
		151.614	253.474	186	0.733803
		101.86
	6	129.243	236.46	355	1.50131	1.37755
		107.217
		132.692	236.086	296	1.25378
		103.394
	7	68.788	162.639	253	1.55559	1.39825
		93.851
		118.675	184.543	229	1.2409
		65.868
	8	134.8	239.284	333	1.39165	1.38193
		104.484
		104.449	214.252	294	1.37222
		109.803
	Mock 495 pLNA
	1	146.68	250.952	373	1.48634	1.40631
		104.272
		91.362	189.252	251	1.32627
		97.89
	2	83.038	159.988	232	1.45011	1.41899
		76.95
		121.054	218.319	303	1.38788
		97.265
	3	57.206	160.242	255	1.59134	1.54626
		103.036
		101.006	163.871	246	1.50118
		62.865
	4	96.352	190.652	228	1.1959	1.16152
		94.3
		86.592	148.163	167	1.12714
		61.571
	5	109.083	163.831	239	1.45882	1.39071
		54.748
		80.525	186.754	247	1.3226
		106.229
	6	83.592	134.688	194	1.44037	1.26232
		51.096
		98.723	156.787	170	1.08427
		58.064
	7	135.524	170.816	176	1.03035	1.28383
		35.292
		86.667	169.126	260	1.53732
		82.459
	8	98.164	126.87	150	1.18231	1.24553
		28.706
		86.077	139.829	183	1.30874
		53.752
	9	77.829	149.837	202	1.34813	1.4346
		72.008
		65.415	130.172	198	1.52106
		64.757
	Mock 329/495 pLNA
	1	171.474	267.349	408	1.5261	1.5416
		95.875
		51.856	98.902	154	1.5571
		47.046
	2	107.11	149.173	217	1.45469	1.49592
		42.063
		103.891	166.541	256	1.53716
		62.65
	3	150.477	221.189	325	1.46933	1.46235
		70.712
		122.901	234.992	342	1.45537
		112.091
	4	109.161	199.384	268	1.34414	1.27892
		90.223
		83.76	187.031	227	1.2137
		103.271
	5	155.33	237.102	209	0.881477	1.06908
		81.772
		114.897	199.731	251	1.25669
		84.834
	6	135.527	212.798	173	0.812978	0.817707
		77.271
		130.483	194.544	160	0.822436
		64.061
	7	124.748	190.299	276	1.45035	1.46061
		65.551
		91.211	166.568	245	1.47087
		75.357
	8	83.561	180.445	187	1.03633	0.966772
		96.884
		110.675	168.298	151	0.897218
		57.623
	9	88.296	208.999	266	1.27273	1.29318
		120.703
		92.762	184.223	242	1.31363
		91.461
	Mock Ctr pLNA
	1	132.884	221.808	315	1.42015	1.35906
		88.924
		134.229	227.279	295	1.29796
		93.05
	2	130.591	222.198	366	1.64718	1.56376
		91.607
		106.459	219.545	325	1.48033
		113.086
	3	159.822	232.631	329	1.41426	1.49758
		72.809
		111.8	227.718	360	1.5809
		115.918
	4	157.188	256.961	312	1.21419	1.19211
		99.773
		109.432	186.321	218	1.17002
		76.889
	5	92.274	122.503	153	1.24895	1.08875
		30.229
		94.452	152.927	142	0.928548
		58.475
	6	121.172	236.317	288	1.2187	1.18628
		115.145
		97.397	213.196	246	1.15387
		115.799
	7	139.422	209.504	219	1.04533	1.13116
		70.082
		106.174	191.455	233	1.217
		85.281
	8	84.47	184.242	247	1.34063	1.26056
		99.772
		97.231	171.115	202	1.18049
		73.884
	PTX 329 pLNA
	1	118.991	256.787	258	1.00472	1.00634
		137.796
		88.296	162.705	164	1.00796
		74.409
	2	113.042	196.479	307	1.56251	1.40924
		83.437
		155.039	238.86	300	1.25597
		83.821
	3	83.653	183.752	191	1.03944	0.983962
		100.099
		115.335	212.175	197	0.928479
		96.84
	4	89.016	173.362	233	1.34401	1.19202
		84.346
		93.13	143.264	149	1.04004
		50.134
	5	168.758	271.292	390	1.43757	1.49701
		102.534
		71.699	154.196	240	1.55646
		82.497
	6	101.556	176.074	197	1.11885	1.14101
		74.518
		104.718	196.875	229	1.16317
		92.157
	7	83.406	219.647	242	1.10177	1.12416
		136.241
		155.604	225.894	259	1.14656
		70.29
	8	69.839	206.996	296	1.42998	1.34497
		137.157
		140.109	197.626	249	1.25996
		57.517
	PTX 495 pLNA
	1	120.007	198.146	237	1.19609	1.13608
		78.139
		80.282	153.336	165	1.07607
		73.054
	2	134.853	278.22	330	1.18611	1.21221
		143.367
		188.662	339.982	421	1.2383
		151.32
	3	109.773	178.109	251	1.40925	1.44689
		68.336
		124.18	255.973	380	1.48453
		131.793
	4	87.043	162.019	235	1.45045	1.39008
		74.976
		122.347	221.853	295	1.32971
		99.506
	5	138.494	225.085	228	1.01295	1.35484
		86.591
		101.046	134.965	229	1.69674
		33.919
	6	127.247	185.072	286	1.54534	1.40535
		57.825
		122.021	220.493	279	1.26535
		98.472
	7	98.697	198.358	296	1.49225	1.33565
		99.661
		125.491	221.365	261	1.17905
		95.874
	9	90.343	205.109	311	1.51627	1.5331
		114.766
		69.418	132.264	205	1.54993
		62.846
	PTX 329/495 pLNA
	1	104.563	208.012	215	1.03359	1.16294
		103.449
		217.494	342.032	442	1.29228
		124.538
	2	115.269	227.198	321	1.41286	1.34775
		111.929
		152.134	297.043	381	1.28264
		144.909
	3	109.826	196.6	251	1.2767	1.20553
		86.774
		78.853	159.561	181	1.13436
		80.708
	4	88.94	188.059	250	1.32937	1.22958
		99.119
		106.791	178.795	202	1.12979
		72.004
	5	140.041	259.539	321	1.23681	1.22595
		119.498
		95.78	188.463	229	1.21509
		92.683
	6	83.139	141.516	167	1.18008	1.29936
		58.377
		82.817	181.159	257	1.41864
		98.342
	7	128.822	276.535	467	1.68876	1.69343
		147.713
		140.236	217.302	369	1.6981
		77.066
	8	89.657	148.133	280	1.89019	1.8737
		58.476
		79.446	222.916	414	1.8572
		143.47
	PTX Ctr pLNA
	1	102.206	131.309	153	1.16519	1.20365
		29.103
		103.584	166.651	207	1.24212
		63.067
	2	131.674	265.804	280	1.05341	0.996328
		134.13
		137.606	253.394	238	0.939249
		115.788
	3	72.393	151.434	95	0.627336	0.745927
		79.041
		65.521	137.649	119	0.864518
		72.128
	4	96.567	151.018	193	1.27799	1.22998
		54.451
		89.309	214.049	253	1.18197
		124.74
	5	89.037	189.879	215	1.1323	1.20564
		100.842
		82.226	116.5	149	1.27897
		34.274
	6	85.883	141.563	125	0.882999	0.956378
		55.68
		61.878	132.07	136	1.02976
		70.192
	7	130.065	246.947	223	0.903028	0.84353
		116.882
		170.808	237.235	186	0.784033
		66.427
	8	78.944	148.541	123	0.828054	0.839076
		69.597
		102.198	203.506	173	0.850098
		101.308
	26-08-20
	Mock 329 pLNA
	1	79.518	121.631	127	1.04414	1.01287			Mock 329 pLNA	Mock 495 pLNA	Mock 329/495 pLNA	Mock Ctr pLNA	PTX 329 pLNA	PTX 495 pLNA	PTX 329/495 pLNA	PTX Ctr pLNA
		42.113							1.01287	1.66956	1.01711	1.14676	1.32654	1.28642	1.60057	1.00994
		85.962	182.355	179	0.981602				1.21688	1.34956	1.47448	1.31406	1.22598	1.20532	1.62619	0.985302
		96.393							1.52932	1.20879	1.60917	1.08906	1.37439	1.28513	1.4086	0.880272
	2	163.396	239.217	309	1.29171	1.21688			1.40907	1.53651	1.15111	1.24115	1.29586	1.56149	1.39092	0.953947
		75.821							1.32406	0.997757	1.44519	1.3884	1.08132	1.18018	1.78094	1.03233
		115.383	242.549	277	1.14204				1.6462	1.46874	1.69033	1.41977	0.987314	1.69627	1.29224	1.18572
		127.166							1.52742	1.16925	1.41131	1.3489	1.4393	1.41778	1.53965	1.10023
	3	63.035	159.887	292	1.82629	1.52932			1.36455	1.45095	1.5554	1.20457	0.902711	1.3671	1.37623	1.17909
		96.852									1.48832	1.10141		1.46134	1.61045	1.0808
		58.175	146.874	181	1.23235						1.42232
		88.699									1.79234
	4	104.728	175.237	262	1.49512	1.40907					1.34967
		70.509							1.3788	1.35639	1.45056	1.25045	1.20418	1.38456	1.51398	1.04529
		103.249	182.158	241	1.32303
		78.909
	5	67.253	145.084	200	1.37851	1.32406
		77.831
		118.271	161.467	205	1.26961
		43.196
	6	217.979	272.529	390	1.43104	1.6462
		54.55
		114.733	241.76	450	1.86135
		127.027
	7	90.429	222.871	327	1.46722	1.52742
		132.442
		94.157	154.318	245	1.58763
		60.161
	8	189.971	247.422	340	1.37417	1.36455
		57.451
		66.635	145.394	197	1.35494
		78.759
	Mock 495 pLNA
	1	100.723	172.385	309	1.7925	1.66956
		71.662
		86.029	148.064	229	1.54663
		62.035
	2	127.857	174.559	215	1.23168	1.34956
		46.702
		46.149	104.945	154	1.46744
		58.796
	3	119.752	166.952	218	1.30576	1.20879
		47.2
		90.805	176.289	196	1.11181
		85.484
	4	104.269	194.951	258	1.32341	1.53651
		90.682
		47.271	128.028	224	1.74962
		80.757
	5	227.994	301.336	327	1.08517	0.997757
		73.342
		106.856	209.81	191	0.910347
		102.954
	6	139.681	235.561	332	1.4094	1.46874
		95.88
		59.821	124.994	191	1.52807
		65.173
	7	100.125	183.082	232	1.26719	1.16925
		82.957
		106.175	201.621	216	1.07132
		95.446
	8	156.368	252.589	348	1.37773	1.45095
		96.221
		139.105	316.237	482	1.52417
		177.132
	Mock 329/495 pLNA
	1	111.766	212.869	198	0.93015	1.01711
		101.103
		105.213	251.796	278	1.10407
		146.583
	2	140.926	220.787	368	1.66676	1.47448
		79.861
		117.606	214.477	275	1.28219
		96.871
	3	111.125	184.586	275	1.48982	1.60917
		73.461
		75.45	104.714	181	1.72852
		29.264
	4	71.166	126.889	138	1.08756	1.15111
		55.723
		84.491	179.474	218	1.21466
		94.983
	5	100.492	207.768	297	1.42948	1.44519
		107.276
		96.87	160.86	235	1.4609
		63.99
	6	72.828	137.129	284	2.07104	1.69033
		64.301
		51.243	128.281	168	1.30962
		77.038
	7	102.715	192.073	252	1.312	1.41131
		89.358
		58.221	113.198	171	1.51063
		54.977
	8	86.51	165.11	246	1.48992	1.5554
		78.6
		75.145	163.492	265	1.62087
		88.347
	9	109.48	189.58	285	1.50332	1.48832
		80.1
		80.904	145.251	214	1.47331
		64.347
	10	158.433	238.159	335	1.40662	1.42232
		79.726
		101.286	205.84	296	1.43801
		104.554
	11	94.446	208.686	329	1.57653	1.79234
		114.24
		110.527	203.173	408	2.00814
		92.646
	12	84.261	173.79	230	1.32344	1.34967
		89.529
		83.658	162.075	223	1.37591
		78.417
	Mock Ctr pLNA
	1	141.532	223.08	229	1.02654	1.14676
		81.548
		120.465	243.886	309	1.26699
		123.421
	2	121.305	217.496	329	1.51267	1.31406
		96.191
		110.827	208.884	233	1.11545
		98.057
	3	109.697	177.417	182	1.02583	1.08906
		67.72
		75.816	179.642	207	1.15229
		103.826
	4	87.015	143.606	169	1.17683	1.24115
		56.591
		96.346	146.308	191	1.30547
		49.962
	5	108.403	264.548	356	1.34569	1.3884
		156.145
		133.546	208.93	299	1.4311
		75.384
	6	116.559	205.428	302	1.4701	1.41977
		88.869
		140.748	284.056	389	1.36945
		143.308
	7	166.844	249.142	346	1.38877	1.3489
		82.298
		77.04	140.562	184	1.30903
		63.522
	8	158.639	208.602	264	1.26557	1.20457
		49.963
		75.414	130.294	149	1.14357
		54.88
	9	102.242	170.753	166	0.972164	1.10141
		68.511
		95.618	139.764	172	1.23065
		44.146
	PTX 329 pLNA
	1	167.908	203.683	283	1.38941	1.32654
		35.775
		125.022	242.154	306	1.26366
		117.132
	2	107.579	186.457	263	1.41051	1.22598
		78.878
		119.519	172.838	180	1.04144
		53.319
	3	144.879	225.401	275	1.22005	1.37439
		80.522
		102.197	223.06	341	1.52874
		120.863
	4	126.973	195.488	288	1.47324	1.29586
		68.515
		88.257	167.192	187	1.11847
		78.935
	5	124.002	230.728	240	1.04019	1.08132
		106.726
		87.481	130.071	146	1.12246
		42.59
	6	179.566	374.974	398	1.06141	0.987314
		195.408
		61.397	177.394	162	0.913221
		115.997
	7	128.845	164.682	229	1.39056	1.4393
		35.837
		101.512	165.99	247	1.48804
		64.478
	8	161.547	298.713	302	1.011	0.902711
		137.166
		123.817	231.616	184	0.794418
		107.799
	PTX 495 pLNA
	1	68.105	139.879	182	1.30112	1.28642
		71.774
		94.964	217.03	276	1.27171
		122.066
	2	142.51	200.855	238	1.18493	1.20532
		58.345
		98.602	132.168	162	1.22571
		33.566
	3	128.815	228.329	291	1.27448	1.28513
		99.514
		161.173	253.9	329	1.29579
		92.727
	4	127.499	226.122	367	1.62302	1.56149
		98.623
		105.78	227.34	341	1.49996
		121.56
	5	81.067	168.737	220	1.3038	1.18018
		87.67
		101.135	161.847	171	1.05655
		60.712
	6	102.58	156.878	242	1.5426	1.69627
		54.298
		81.271	118.923	220	1.84994
		37.652
	7	96.684	194.051	325	1.67482	1.41778
		97.367
		138.605	271.378	315	1.16074
		132.773
	8	75.966	160.556	242	1.50726	1.3671
		84.59
		126.401	225.767	277	1.22693
		99.366
	9	71.053	141.073	197	1.39644	1.46134
		70.02
		97.52	168.387	257	1.52625
		70.867
	PTX 329/495 pLNA
	1	128.403	258.217	477	1.84728	1.60057
		129.814
		101.98	214.942	291	1.35385
		112.962
	2	74.605	178.081	310	1.74078	1.62619
		103.476
		67.733	126.357	191	1.51159
		58.624
	3	61.156	145.607	199	1.36669	1.4086
		84.451
		79.421	177.87	258	1.4505
		98.449
	4	47.015	131.077	164	1.25117	1.39092
		84.062
		70.961	116.943	179	1.53066
		45.982
	5	99.623	179.401	312	1.73912	1.78094
		79.778
		104.689	214.509	391	1.82277
		109.82
	6	100.985	252.272	355	1.40721	1.29224
		151.287
		101.41	208.957	246	1.17728
		107.547
	7	85.646	165.272	250	1.51266	1.53965
		79.626
		101.559	163.406	256	1.56665
		61.847
	8	115.069	162.461	215	1.32339	1.37623
		47.392
		44.519	100.066	143	1.42906
		55.547
	9	100.196	186.323	329	1.76575	1.61045
		86.127
		96.866	169.743	247	1.45514
		72.877
	PTX Ctr pLNA
	1	112.426	213.189	229	1.07416	1.00994
		100.763
		130.797	291.842	276	0.945717
		161.045
	2	96.411	164.376	158	0.961211	0.985302
		67.965
		86.283	135.725	137	1.00939
		49.442
	3	75.639	181.594	141	0.776457	0.880272
		105.955
		78.765	137.183	135	0.984087
		58.418
	4	98.327	171.288	156	0.910747	0.953947
		72.961
		112.525	180.515	180	0.997147
		67.99
	5	119.427	150.776	170	1.1275	1.03233
		31.349
		127.846	256.094	240	0.937156
		128.248
	6	84.023	145.707	178	1.22163	1.18572
		61.684
		126.621	161.766	186	1.14981
		35.145
	7	118.216	177.867	171	0.961393	1.10023
		59.651
		89.166	162.218	201	1.23907
		73.052
	8	71.862	139.526	186	1.33308	1.17909
		67.664
		117.355	175.594	180	1.02509
		58.239
	9	155.753	228.343	216	0.945945	1.0808
		72.59
		86.278	188.377	229	1.21565
		102.099
	pLNA spine analysis
	17-06-20
	Mock 329 pLNA							Mock 329 pLNA	Mock 495 pLNA	Mock 329/495 pLNA	Mock Ctr pLNA	PTX 329 pLNA	PTX 495 pLNA	PTX 329/495 pLNA	PTX Ctr pLNA
	1	181.563	261.998	409	1.56108	1.47774		1.47774	1.87225	1.14343	1.19353	1.42486	1.50758	1.66887	1.06011
		80.435						1.84923	1.38627	1.0149	1.29114	1.51944	1.5079	1.41419	0.808353
		134.155	220.883	308	1.3944			0.951757	1.53758	1.28949	1.38855	1.47799	1.39156	1.71357	1.08826
		86.728						1.6288	0.628779	1.65522	1.20528	1.96684	1.10172	2.01354	0.895504
	2	130.994	213.998	394	1.84114	1.84923		1.8862	1.00067	1.83057	1.27312	1.37901	1.26194	1.4642	1.08928
		83.004						1.25013	1.42482	1.44732	1.51753	1.44182	1.89417	1.48654	1.00845
		121.553	248.206	461	1.85733			1.80966	1.39215	1.82282	1.23266	1.58246	1.7873	1.12508	0.930117
		126.653						1.45582	1.29504			1.03242	1.61551	1.63232	1.0065
	3	99.908	177.574	186	1.04745	0.951757		1.53867	1.31719	1.45768	1.30026	1.47811	1.50846	1.56479	0.985821
		77.666
		97.787	220.778	189	0.856064
		122.991
	4	94.376	221.477	389	1.75639	1.6288
		127.101
		89.845	165.866	249	1.50121
		76.021
	5	67.004	141.743	261	1.84136	1.8862
		74.739
		80.898	156.91	303	1.93104
		76.012
	6	102.915	190.862	240	1.25745	1.25013
		87.947
		103.618	202.767	252	1.24281
		99.149
	7	144.294	194.463	359	1.84611	1.80966
		50.169
		127.541	221.069	392	1.7732
		93.528
	8	95.485	201.912	304	1.50561	1.45582
		106.427
		77.876	177.094	249	1.40603
		99.218
	Mock 495 pLNA
	1	137.661	199.243	387	1.94235	1.87225
		61.582
		84.522	174.236	314	1.80215
		89.714
	2	134.263	245.147	378	1.54193	1.38627
		110.884
		131.106	245.406	302	1.23061
		114.3
	3	149.335	259.202	415	1.60107	1.53758
		109.867
		114.271	259.144	382	1.47408
		144.873
	4	95.848	203.922	106	0.519807	0.628779
		108.074
		59.792	176.211	130	0.737752
		116.419
	5	67.568	166.449	203	1.21959	1.00067
		98.881
		76.726	152.222	119	0.781753
		75.496
	6	101.887	179.742	294	1.63568	1.42482
		77.855
		79.485	165.574	201	1.21396
		86.089
	7	126.391	212.278	273	1.28605	1.39215
		85.887
		105.394	146.838	220	1.49825
		41.444
	8	135.492	196.399	285	1.45113	1.29504
		60.907
		101.873	194.917	222	1.13895
		93.044
	Mock 329/495 pLNA
	1	96.835	180.909	201	1.11106	1.14343
		84.074
		134.067	228.78	269	1.1758
		94.713
	2	102.807	176.8	195	1.10294	1.0149
		73.993
		73.608	178.02	165	0.926862
		104.412
	3	149.089	315.03	408	1.29511	1.28949
		165.941
		193.112	326.357	419	1.28387
		133.245
	4	113.632	205.904	386	1.87466	1.65522
		92.272
		81.142	189.443	272	1.43579
		108.301
	5	104.386	182.423	312	1.71031	1.83057
		78.037
		111.477	230.67	450	1.95084
		119.193
	6	110.638	140.882	168	1.19249	1.44732
		30.244
		124.011	200.921	342	1.70216
		76.91
	7	151.025	177.513	317	1.78578	1.82282
		26.488
		117.966	214.532	399	1.85986
		96.566
	Mock Ctr pLNA
	1	157.566	198.885	274	1.37768	1.19353
		41.319
		120.204	214.984	217	1.00938
		94.78
	2	128.943	253.717	301	1.18636	1.29114
		124.774
		152.4	237.12	331	1.39592
		84.72
	3	103.99	201.073	330	1.64119	1.38855
		97.083
		111.342	183.995	209	1.1359
		72.653
	4	112.011	237.474	285	1.20013	1.20528
		125.463
		128.913	289.978	351	1.21044
		161.065
	5	163.638	247.279	305	1.23342	1.27312
		83.641
		81.77	162.246	213	1.31282
		80.476
	6	93.248	151.138	235	1.55487	1.51753
		57.89
		130.241	167.545	248	1.4802
		37.304
	7	122.604	171.662	203	1.18256	1.23266
		49.058
		126.511	356.263	457	1.28276
		229.752
	PTX 329 pLNA
	1	162.479	244.866	350	1.42935	1.42486
		82.387
		100.413	173.194	246	1.42037
		72.781
	2	107.841	226.189	336	1.48548	1.51944
		118.348
		96.557	163.512	254	1.5534
		66.955
	3	102.884	213.965	335	1.56568	1.47799
		111.081
		93.089	177.658	247	1.39031
		84.569
	4	152.563	271.997	556	2.04414	1.96684
		119.434
		159.671	248.737	470	1.88955
		89.066
	5	101.405	143.004	206	1.44052	1.37901
		41.599
		56.157	113.852	150	1.3175
		57.695
	6	92.077	144.822	209	1.44315	1.44182
		52.745
		96.378	183.272	264	1.44048
		86.894
	7	114.125	174.315	313	1.7956	1.58246
		60.19
		113.126	204.482	280	1.36931
		91.356
	8	109.284	168.909	136	0.805167	1.03242
		59.625
		123.879	230.219	290	1.25967
		106.34
	PTX 495 pLNA
	1	123.072	278.094	450	1.61816	1.50758
		155.022
		122.518	173.943	243	1.39701
		51.425
	2	87.56	167.803	240	1.43025	1.5079
		80.243
		63.382	119.202	189	1.58554
		55.82
	3	164.19	307.547	409	1.32988	1.39156
		143.357
		88.129	224.325	326	1.45325
		136.196
	4	240.242	373.649	399	1.06785	1.10172
		133.407
		116.985	180.524	205	1.13558
		63.539
	5	88.243	150.58	192	1.27507	1.26194
		62.337
		88.314	215.405	269	1.24881
		127.091
	6	183.3	216.372	379	1.75161	1.89417
		33.072
		69.341	165.461	337	2.03673
		96.12
	7	96.465	182.508	312	1.70951	1.7873
		86.043
		125.312	172.646	322	1.86509
		47.334
	9	105.378	401.112	648	1.61551	1.61551
		103.686
		88.009
		104.039
	PTX 329/495 pLNA
	1	134.068	213.529	335	1.56887	1.66887
		79.461
		104.805	206.346	365	1.76887
		101.541
	2	86.831	141.231	243	1.72059	1.41419
		54.4
		120.414	188.663	209	1.1078
		68.249
	3	117.618	202.475	363	1.79281	1.71357
		84.857
		100.019	173.161	283	1.63432
		73.142
	4	93.806	168.133	389	2.31364	2.01354
		74.327
		94.63	194.931	334	1.71343
		100.301
	5	118.038	171.884	234	1.36138	1.4642
		53.846
		78.577	153.796	241	1.56701
		75.219
	6	162.012	273.583	404	1.4767	1.48654
		111.571
		79.26	173.085	259	1.49637
		93.825
	7	110.003	139.229	164	1.17792	1.12508
		29.226
		129.416	203.31	218	1.07225
		73.894
	8	94.09	137.287	250	1.821	1.63232
		43.197
		104.992	196.724	284	1.44365
		91.732
	PTX Ctr pLNA
	1	93.341	141.006	143	1.01414	1.06011
		47.665
		135.415	188.053	208	1.10607
		52.638
	2	141.052	188.668	167	0.885153	0.808353
		47.616
		89.903	154.466	113	0.731553
		64.563
	3	91.376	136.12	142	1.0432	1.08826
		44.744
		111.677	232.06	263	1.13333
		120.383
	4	103.859	216.729	143	0.65981	0.895504
		112.87
		103.905	183.876	208	1.1312
		79.971
	5	146.702	258.579	268	1.03643	1.08928
		111.877
		77.114	140.09	160	1.14212
		62.976
	6	75.519	145.084	136	0.937388	1.00845
		69.565
		79.642	144.511	156	1.0795
		64.869
	7	109.017	194.282	192	0.988254	0.930117
		85.265
		64.727	137.618	120	0.871979
		72.891
	8	125.539	175.675	173	0.984773	1.0065
		50.136
		120.233	185.755	191	1.02824
		65.522
	COMPILED
			Mock 329 pLNA	Mock 495 pLNA	Mock 329/495 pLNA	Mock Ctr pLNA	PTX 329 pLNA	PTX 495 pLNA	PTX 329/495 pLNA	PTX Ctr pLNA
	Rep3	19-08-20	1.21109	1.35001	1.26513	1.28491	1.21234	1.35177	1.37978	1.00256
	Rep2	26-08-20	1.3788	1.35639	1.45056	1.25045	1.20418	1.38456	1.51398	1.04529
	Rep1	17-06-20	1.53867	1.31719	1.45768	1.30026	1.47811	1.50846	1.56479	0.985821
	Normalized to Ctr pLNA Mock
	Rep3	19-08-20	0.942556	1.05067	0.984611	1.00001	0.943528	1.05205	1.07384	0.780266
	Rep2	26-08-20	1.10268	1.08477	1.16008	1.00004	0.963033	1.10729	1.21079	0.835966
	Rep1	17-06-20	1.18359	1.01323	1.12129	1.0002	1.137	1.16035	1.20368	0.758324
	PTX/Mock
	Rep3		1	1	1	1	1.00103	1.00131	1.09063	0.780266
	Rep2		1	1	1	1	0.873353	1.02077	1.04372	0.835966
	Rep1		1	1	1	1	0.96064	1.14521	1.07348	0.758324

## Sheet: 4B
	Ctr pLNA + Ctr shRNA			329/495 pLNA + Ctr shRNA			329/495 pLNA + Prr7 shRNA
	Rep1	Rep2	Rep3	Rep1	Rep2	Rep3	Rep1	Rep2	Rep3
	0.901382	0.739518	0.674939	1.10816	1.05586	1.11031	0.894311	0.62792	0.692818
	29-07-21
		Mock 329 495 Prr7sh
			Length	Dendrite Sum	Spine number	Spine#/um	Average
		1	104.507	196.85	148	0.751842	0.773112
			92.343
			103.541	197.638	157	0.794382
			94.097
		2	91.08	145.063	157	1.08229	1.0479
			53.983
			134.111	232.856	236	1.0135
			98.745
		3	107.295	219.008	227	1.03649	1.06885
			111.713
			74.64	133.49	147	1.10121
			58.85
		4	154.893	282.574	296	1.04751	0.994809
			127.681						Mock Ctr Ctrsh	PTX Ctr Ctrsh	Mock Ctr Prr7sh	PTX Ctr Prr7sh	Mock 329495 Ctrsh	PTX 329495 Ctrsh	Mock 329 495 Prr7sh	PTX 329 495 Prr7sh
			129.614	292.961	276	0.942105			1.01425	0.983111	0.872727	0.832594	1.00072	1.18824	0.773112	0.758354
			163.347						0.902263	0.833202	0.757464	0.746434	0.945925	1.06126	1.0479	0.872039
		5	87.756	205.395	155	0.754643	0.766483		0.865343	1.21161	0.989824	0.866818	1.05658	1.25852	1.06885	0.743368
			117.639						0.763607	1.023	0.807812	0.811497	1.13726	1.04837	0.994809	0.663609
			131.762	240.26	187	0.778323			1.06624	0.748932	1.09353	0.841259	0.737167	1.3083	0.766483	0.631916
			108.498						1.1952	0.659583	0.826709	0.866723	1.0754	1.29245	0.807131	0.519995
		6	110.121	195.581	165	0.84364	0.807131		1.0645	0.930966	0.854146	0.97322	1.05339	1.04743	0.603147	0.781311
			85.46						1.20917	0.950831	0.872075	0.723412	1.41975	0.984724	0.577374	0.772187
			59.73	138.849	107	0.770621			0.911016	0.846039	1.05837	1.15615	1.39582	1.50441	0.435198	0.770561
			79.119						0.98901	0.809059	1.19294	0.865475	0.900198			0.515942
		7	111.615	200.393	116	0.578863	0.603147
			88.778					Average	0.99806	0.899633	0.93256	0.868358	1.07222	1.18819	0.786	0.702928
			103.8	229.507	144	0.627432		PTX/Mock	1	0.901382	1	0.931155	1	1.10816	1	0.894311
			125.707
		8	98.854	172.799	118	0.682874	0.577374
			73.945
			135.212	209.802	99	0.471873
			74.59
		9	146.409	249.766	128	0.51248	0.435198
			103.357
			150.89	198.37	71	0.357917
			47.48
		PTX 329 495 Prr7sh
		1	160.888	288.413	225	0.780131	0.758354
			127.525
			115.343	206.36	152	0.736577
			91.017
		2	90.511	207.178	180	0.868818	0.872039
			116.667
			108.882	163.38	143	0.87526
			54.498
		3	87.692	173.373	154	0.888258	0.743368
			85.681
			91.382	142.027	85	0.598478
			50.645
		4	141.626	273.609	179	0.654218	0.663609
			131.983
			158.594	310.55	209	0.673
			151.956
		5	152.586	297.207	179	0.602274	0.631916
			144.621
			144.758	202.552	134	0.661559
			57.794
		6	138.674	215.647	114	0.528642	0.519995
			76.973
			76.841	162.316	83	0.511348
			85.475
		7	113.926	221.792	163	0.734923	0.781311
			107.866
			160.647	285.128	236	0.827698
			124.481
		8	121.149	177.814	113	0.635496	0.772187
			56.665
			72.111	166.139	151	0.908878
			94.028
		9	95.134	194.423	125	0.642928	0.770561
			99.289
			119.613	203.742	183	0.898195
			84.129
		10	138.813	255.063	130	0.509678	0.515942
			116.25
			89.462	176.176	92	0.522205
			86.714
		Mock 329495 Ctrsh
		1	142.752	276.872	285	1.02936	1.00072
			134.12
			138.81	189.285	184	0.972079
			50.475
		2	129.085	218.431	196	0.897309	0.945925
			89.346
			179.844	265.449	264	0.994541
			85.605
		3	118.156	179.661	184	1.02415	1.05658
			61.505
			105.352	233.239	254	1.08901
			127.887
		4	124.318	225.974	272	1.20368	1.13726
			101.656
			102.986	172.76	185	1.07085
			69.774
		5	82.649	179.784	116	0.645219	0.737167
			97.135
			126.691	171.267	142	0.829115
			44.576
		6	123.016	216.208	222	1.02679	1.0754
			93.192
			74.545	137.009	154	1.12401
			62.464
		7	80.007	178.567	205	1.14803	1.05339
			98.56
			71.385	249.284	239	0.958746
			177.899
		8	114.935	196.079	282	1.4382	1.41975
			81.144
			124.804	209.805	294	1.4013
			85.001
		9	93.678	186.975	252	1.34777	1.39582
			93.297
			74.355	131.591	190	1.44387
			57.236
		10	115.105	192.001	181	0.942703	0.900198
			76.896
			106.511	156.233	134	0.857693
			49.722
		Mock Ctr Ctrsh
		1	153.154	204.817	241	1.17666	1.01425
			51.663
			67.997	185.48	158	0.851844
			117.483
		2	111.94	169.42	189	1.11557	0.902263
			57.48
			77.993	159.662	110	0.688955
			81.669
		3	102.505	215.074	178	0.827622	0.865343
			112.569
			102.493	174.96	158	0.903064
			72.467
		4	143.383	221.454	168	0.758623	0.763607
			78.071
			145.494	193.861	149	0.768592
			48.367
		5	163.612	262.281	270	1.02943	1.06624
			98.669
			139.688	226.645	250	1.10305
			86.957
		6	150.265	238.006	306	1.28568	1.1952
			87.741
			144.335	268.849	297	1.10471
			124.514
		7	57.122	143.36	159	1.1091	1.0645
			86.238
			61.035	121.579	124	1.01991
			60.544
		8	120.126	198.223	227	1.14517	1.20917
			78.097
			102.341	156.304	199	1.27316
			53.963
		9	144.592	277.592	226	0.814144	0.911016
			133
			113.693	228.2	230	1.00789
			114.507
		10	166.044	253.931	230	0.905758	0.98901
			87.887
			87.34	235.017	252	1.07226
			147.677
		Mock Ctr Prr7sh
		1	91.425	187.954	152	0.808709	0.872727
			96.529
			96.083	164.399	154	0.936745
			68.316
		2	81.576	201.286	145	0.720368	0.757464
			119.71
			130.743	276.883	220	0.794559
			146.14
		3	116.742	198.994	200	1.00506	0.989824
			82.252
			134.423	192.901	188	0.974593
			58.478
		4	127.099	231.995	200	0.862088	0.807812
			104.896
			132.977	240.201	181	0.753536
			107.224
		5	133.863	238.981	260	1.08795	1.09353
			105.118
			122.272	255.66	281	1.09912
			133.388
		6	143.614	202.343	173	0.854984	0.826709
			58.729
			94.41	169.081	135	0.798434
			74.671
		7	114.079	180.692	160	0.885485	0.854146
			66.613
			98.858	187.164	154	0.822808
			88.306
		8	134.436	221.662	205	0.924832	0.872075
			87.226
			97.182	167.212	137	0.819319
			70.03
		9	159.058	219.221	239	1.09022	1.05837
			60.163
			115.088	227.957	234	1.02651
			112.869
		10	182.776	276.382	347	1.25551	1.19294
			93.606
			175.575	254.784	288	1.13037
			79.209
		PTX 329495 Ctrsh
		1	99.506	124.454	165	1.32579	1.18824
			24.948
			89.073	164.654	173	1.05069
			75.581
		2	89.016	177.091	189	1.06725	1.06126
			88.075
			84.732	151.621	160	1.05526
			66.889
		3	106.128	189.887	281	1.47983	1.25852
			83.759
			75.43	127.263	132	1.03722
			51.833
		4	79.101	143.724	158	1.09933	1.04837
			64.623
			130.218	237.617	237	0.997403
			107.399
		5	125.845	260.727	364	1.3961	1.3083
			134.882
			81.519	171.241	209	1.2205
			89.722
		6	92.194	185.238	262	1.4144	1.29245
			93.044
			99.659	173.43	203	1.1705
			73.771
		7	134.172	197.489	201	1.01778	1.04743
			63.317
			125.658	174.546	188	1.07708
			48.888
		8	92.152	177.308	211	1.19002	0.984724
			85.156
			89.275	161.657	126	0.779428
			72.382
		9	86.081	108.003	160	1.48144	1.50441
			21.922
			130.805	267.125	408	1.52737
			136.32
		PTX Ctr Ctrsh
		1	151.599	226.359	227	1.00283	0.983111
			74.76
			92.112	128.712	124	0.963391
			36.6
		2	104.005	208.081	177	0.85063	0.833202
			104.076
			107.856	193.681	158	0.815774
			85.825
		3	118.164	211.342	248	1.17345	1.21161
			93.178
			97.554	188.034	235	1.24977
			90.48
		4	84.689	146.119	140	0.958123	1.023
			61.43
			75.727	130.53	142	1.08787
			54.803
		5	135.869	224.773	165	0.734074	0.748932
			88.904
			118.802	195.08	149	0.763789
			76.278
		6	104.463	176.597	128	0.724814	0.659583
			72.134
			126.011	159.838	95	0.594352
			33.827
		7	78.048	147.882	142	0.960225	0.930966
			69.834
			71.018	138.626	125	0.901707
			67.608
		8	101.786	199.678	207	1.03667	0.950831
			97.892
			109.401	190.753	165	0.864993
			81.352
		9	75.074	125.775	122	0.969986	0.846039
			50.701
			88.729	134.332	97	0.722092
			45.603
		10	131.964	209.38	154	0.735505	0.809059
			77.416
			113.443	182.413	161	0.882613
			68.97
		PTX Ctr Prr7sh
		1	102.075	158.369	148	0.934526	0.832594
			56.294
			128.701	214.874	157	0.730661
			86.173
		2	70.356	162.554	124	0.762823	0.746434
			92.198
			111.128	234.232	171	0.730045
			123.104
		3	98.047	160.469	146	0.909833	0.866818
			62.422
			112.772	165.088	136	0.823803
			52.316
		4	87.592	177.547	150	0.844847	0.811497
			89.955
			96.541	160.638	125	0.778147
			64.097
		5	79.066	160.675	130	0.809087	0.841259
			81.609
			89.604	152.273	133	0.873431
			62.669
		6	155.18	212.831	189	0.888029	0.866723
			57.651
			64.84	132.479	112	0.845417
			67.639
		7	174.44	244.021	210	0.860582	0.97322
			69.581
			201.062	307.591	334	1.08586
			106.529
		8	112.603	165.274	129	0.780522	0.723412
			52.671
			124.275	174.095	116	0.666303
			49.82
		9	94.368	176.626	185	1.04741	1.15615
			82.258
			73.392	116.216	147	1.26489
			42.824
		10	67.039	138.468	118	0.852182	0.865475
			71.429
			138.476	235.557	207	0.878768
			97.081
	2021-11-08
	Mock 329 495 Ctrsh					average
	1	87.963	181.31	129	0.711489	0.675812
		93.347
		90.077	182.774	117	0.640135
		92.697
	2	150.627	268.86	246	0.914974	0.915605
		118.233
		143.633	291.41	267	0.916235
		147.777
	3	94.765	157.094	125	0.795702	0.744765
		62.329
		127.146	298.345	207	0.693828
		171.199
	4	71.831	192.953	191	0.989878	1.01033
		121.122
		64.971	136.79	141	1.03078			Mock Ctr Ctrsh	PTX Ctr Ctrsh	Mock Ctr Prr7sh	PTX Ctr Prr7sh	Mock 329 495 Ctrsh	PTX 329 495 Ctrsh	Mock 329 495 Prr7sh	PTX 329 495 Prr7sh
		71.819						0.811388	0.608243	0.863599	0.547822	0.675812	0.767975	0.808207	0.658295
	5	93.581	179.738	140	0.778912	0.820325		0.752417	0.55539	0.733113	0.522357	0.915605	1.00786	0.847605	0.577833
		86.157						0.839262	0.609648	0.756568	0.600012	0.744765	0.625738	1.00565	0.60568
		87.748	200.757	173	0.861738			0.680356	0.442522	0.441442	0.478907	1.01033	1.10347	1.049	0.674905
		113.009						0.864037	0.604757	0.822791	0.484365	0.820325	0.983797	0.686841	0.578702
	6	109.759	161.734	126	0.779057	0.836191		0.643941	0.57021	0.686832	0.645058	0.836191	0.822608	0.770552	0.410084
		51.975						0.586659	0.55112	0.725264	0.403542	0.719561	0.729763	0.977874	0.445217
		119.859	227.241	203	0.893325			0.672176	0.518547	0.544885	0.425861	0.691074	0.56968	0.815713	0.534702
		107.382						0.682764	0.563697	0.728674	0.777737	0.560271	0.617758	0.80267	0.337155
	7	121.672	264.718	185	0.698857	0.719561		0.884882	0.461524	0.534269	0.548392	0.821934	1.00268	0.744236	0.519988
		143.046						0.741788	0.548566	0.683744	0.543405	0.779586	0.823133	0.850835	0.534256
		150.641	267.472	198	0.740264
		116.831						PTX/Mock	0.739518		0.79475		1.05586		0.62792
	8	94.319	160.851	119	0.739815	0.691074
		66.532
		109.734	228.853	147	0.642334
		119.119
	9	93.677	112.215	70	0.623803	0.560271
		18.538
		109.763	191.247	95	0.49674
		81.484
	10	97.161	197.543	144	0.728955	0.821934
		100.382
		84.144	192.368	176	0.914913
		108.224
	Mock 329 495 Prr7sh
	1	103.48	166.642	118	0.708105	0.808207
		63.162
		87.588	167.344	152	0.908309
		79.756
	2	90.144	139.211	124	0.890734	0.847605
		49.067
		83.111	166.568	134	0.804476
		83.457
	3	107.136	235.994	234	0.991551	1.00565
		128.858
		129.746	254.966	260	1.01974
		125.22
	4	113.013	232.312	238	1.02448	1.049
		119.299
		133.08	231.016	248	1.07352
		97.936
	5	116.024	230.544	162	0.702686	0.686841
		114.52
		126.475	268.258	180	0.670996
		141.783
	6	101.114	187.057	149	0.796549	0.770552
		85.943
		68.244	143.71	107	0.744555
		75.466
	7	61.313	139.619	138	0.988404	0.977874
		78.306
		76.828	154.03	149	0.967344
		77.202
	8	120.663	241.334	171	0.708562	0.815713
		120.671
		59.679	130.03	120	0.922864
		70.351
	9	72.776	136.409	108	0.791737	0.80267
		63.633
		44.329	122.91	100	0.813603
		78.581
	10	99.844	191.739	131	0.68322	0.744236
		91.895
		67.507	122.943	99	0.805251
		55.436
	Mock Ctr Ctrsh
	1	97.682	168.915	131	0.775538	0.811388
		71.233
		67.664	139.276	118	0.847239
		71.612
	2	93.1	206.267	152	0.736909	0.752417
		113.167
		116.265	216.167	166	0.767925
		99.902
	3	82.34	160.833	132	0.820727	0.839262
		78.493
		99.046	178.364	153	0.857796
		79.318
	4	91.503	161.461	105	0.650312	0.680356
		69.958
		87.301	168.919	120	0.7104
		81.618
	5	97.425	175.905	147	0.835678	0.864037
		78.48
		86.619	168.087	150	0.892395
		81.468
	6	143.033	269.95	207	0.766809	0.643941
		126.917
		172.032	222.617	116	0.521074
		50.585
	7	123.407	259.528	156	0.601091	0.586659
		136.121
		139.145	234.173	134	0.572227
		95.028
	8	114.517	233.889	162	0.692636	0.672176
		119.372
		171.744	247.04	161	0.651716
		75.296
	9	132.16	242.148	161	0.664883	0.682764
		109.988
		96.721	172.698	121	0.700645
		75.977
	10	145.627	279.765	273	0.975819	0.884882
		134.138
		144.249	346.372	275	0.793944
		202.123
	Mock Ctr Prr7sh
	1	128.343	199.662	158	0.791337	0.863599
		71.319
		109.972	179.514	168	0.93586
		69.542
	2	115.92	228.613	161	0.704247	0.733113
		112.693
		109.839	190.294	145	0.761979
		80.455
	3	107.384	155.722	131	0.841243	0.756568
		48.338
		123.797	211.343	142	0.671894
		87.546
	4	129.397	244.317	100	0.409304	0.441442
		114.92
		91.953	204.823	97	0.47358
		112.87
	5	151.113	255.342	194	0.759765	0.822791
		104.229
		78.239	147.886	131	0.885817
		69.647
	6	151.542	264.444	167	0.631514	0.686832
		112.902
		74.4	164.387	122	0.742151
		89.987
	7	112.181	205.568	166	0.807519	0.725264
		93.387
		112.905	181.957	117	0.643009
		69.052
	8	74.344	159.289	88	0.552455	0.544885
		84.945
		74.334	154.472	83	0.537314
		80.138
	9	92.258	177.891	122	0.685813	0.728674
		85.633
		76.954	142.573	110	0.771535
		65.619
	10	136.617	200.129	108	0.539652	0.534269
		63.512
		72.329	170.169	90	0.528886
		97.84
	PTX 329 495 Ctrsh
	1	109.666	196.666	118	0.600002	0.767975
		87
		119.013	191.25	179	0.935948
		72.237
	2	207.794	288.99	280	0.968892	1.00786
		81.196
		102.885	176.725	185	1.04682
		73.84
	3	189.404	257.742	177	0.686733	0.625738
		68.338
		135.963	193.008	109	0.564743
		57.045
	4	57.957	166.958	180	1.07811	1.10347
		109.001
		71.281	168.316	190	1.12883
		97.035
	5	68.103	131.233	139	1.05919	0.983797
		63.13
		86.88	165.124	150	0.908408
		78.244
	6	109.292	184.494	150	0.813035	0.822608
		75.202
		91.079	219.904	183	0.832181
		128.825
	7	111.681	168.159	117	0.69577	0.729763
		56.478
		105.246	196.398	150	0.763755
		91.152
	8	137.121	233.071	119	0.510574	0.56968
		95.95
		82.218	130.41	82	0.628786
		48.192
	9	137.454	298.521	186	0.623072	0.617758
		161.067
		212.094	378.81	232	0.612444
		166.716
	10	122.049	198.859	210	1.05602	1.00268
		76.81
		67.378	106.39	101	0.949337
		39.012
	PTX 329 495 Prr7sh
	1	81.38	141.763	91	0.641916	0.658295
		60.383
		104.868	179.346	121	0.674674
		74.478
	2	78.276	186.249	124	0.665775	0.577833
		107.973
		85.652	171.467	84	0.48989
		85.815
	3	182.041	229.445	155	0.675543	0.60568
		47.404
		152.25	237.021	127	0.535818
		84.771
	4	122.074	200.376	112	0.558949	0.674905
		78.302
		45.874	93.569	74	0.79086
		47.695
	5	112.238	162.337	88	0.542082	0.578702
		50.099
		88.212	144.64	89	0.615321
		56.428
	6	108.537	172.596	66	0.382396	0.410084
		64.059
		124.808	175.891	77	0.437771
		51.083
	7	96.54	156.185	67	0.428978	0.445217
		59.645
		99.913	203.703	94	0.461456
		103.79
	8	87.84	223.764	126	0.563093	0.534702
		135.924
		132.857	227.133	115	0.506311
		94.276
	9	92.345	178.926	55	0.30739	0.337155
		86.581
		91.877	207.129	76	0.366921
		115.252
	10	70.675	142.871	67	0.468955	0.519988
		72.196
		97.91	210.15	120	0.571021
		112.24
	PTX Ctr Ctrsh
	1	152.146	241.707	159	0.657821	0.608243
		89.561
		92.903	218.378	122	0.558664
		125.475
	2	143.225	242.171	140	0.578104	0.55539
		98.946
		113.432	214.014	114	0.532675
		100.582
	3	174.822	281.88	156	0.553427	0.609648
		107.058
		84.887	163.696	109	0.665868
		78.809
	4	89.821	187.25	77	0.411215	0.442522
		97.429
		75.273	149.843	71	0.473829
		74.57
	5	107.314	212.994	132	0.619736	0.604757
		105.68
		105.23	174.642	103	0.589778
		69.412
	6	173.748	262.306	139	0.529915	0.57021
		88.558
		148.23	312.856	191	0.610505
		164.626
	7	101.28	199.486	123	0.616585	0.55112
		98.206
		85.179	222.38	108	0.485655
		137.201
	8	134.721	253.506	146	0.575923	0.518547
		118.785
		81.709	175.64	81	0.461171
		93.931
	9	177.748	295.081	159	0.538835	0.563697
		117.333
		121.025	186.897	110	0.588559
		65.872
	10	97.771	188.433	86	0.456396	0.461524
		90.662
		85.482	169.291	79	0.466652
		83.809
	PTX Ctr Prr7sh
	1	104.124	224.789	115	0.511591	0.547822
		120.665
		99.141	167.793	98	0.584053
		68.652
	2	118.144	169.49	93	0.548705	0.522357
		51.346
		122.307	215.722	107	0.496009
		93.415
	3	131.664	216.596	103	0.47554	0.600012
		84.932
		117.718	213.945	155	0.724485
		96.227
	4	130.534	211.578	108	0.51045	0.478907
		81.044
		88.351	181.061	81	0.447363
		92.71
	5	120.632	224.633	109	0.485236	0.484365
		104.001
		141.786	241.988	117	0.483495
		100.202
	6	86.965	114.703	77	0.671299	0.645058
		27.738
		72.499	129.279	80	0.618817
		56.78
	7	147.578	285.078	128	0.449	0.403542
		137.5
		101.406	195.485	70	0.358084
		94.079
	8	78.831	179.483	78	0.434582	0.425861
		100.652
		111.832	213.357	89	0.417141
		101.525
	9	81.193	198.897	157	0.789353	0.777737
		117.704
		85.716	164.465	126	0.76612
		78.749
	10	86.323	180.011	90	0.499969	0.548392
		93.688
		123.005	224.525	134	0.596815
		101.52
	25-08-21
	Mock 329 495 pLNA Ctrsh
	1	119.632	242.983	108	0.444476	0.46049
		123.351
		75.408	253.933	121	0.476504
		178.525
	2	92.27	157.112	90	0.57284	0.549167
		64.842
		139.974	216.939	114	0.525493
		76.965
	3	139.769	232.126	145	0.624661	0.649771
		92.357
		109.87	213.371	144	0.674881
		103.501
	4	129.903	232.467	146	0.628046	0.684439
		102.564							Mock Ctrsh Ctr	PTX Ctrsh Ctr	Mock Prr7sh Ctr	PTX Prr7sh Ctr	Mock 329 495 pLNA Ctrsh	PTX Ctrsh 329 495	Mock Prr7sh 329 495	PTX Prr7sh 329 495
		87.281	170.079	126	0.740832				0.710244	0.607872	0.760772	0.528749	0.46049	0.579456	0.716662	0.608351
		82.798							0.885562	0.478191	0.778393	0.575359	0.549167	0.711981	0.739898	0.591147
	5	139.3	281.515	171	0.607428	0.568251			0.950271	0.596585	0.853294	0.53289	0.649771	0.690615	0.798307	0.473422
		142.215							0.608049	0.498763	0.841591	0.554002	0.684439	0.755725	0.739939	0.419804
		142.339	272.173	144	0.529075				1.12685	0.492377	0.726201	0.467609	0.568251	0.730379	0.517797	0.517305
		129.834							0.726265	0.501507	0.737385	0.578801	0.775179	0.829568	0.890557	0.547383
	6	123.955	236.225	165	0.698487	0.775179			0.878818	0.619648	0.794719	0.523727	0.59577	0.686009	0.730403	0.427509
		112.27							0.766219	0.629839	0.682048	0.548409	0.673804	0.55305	0.671664	0.510361
		98.123	163.17	139	0.851872				0.916242	0.557003	0.634502	0.826539	0.638306	0.68552	0.655349	0.496771
		65.047							0.669635	0.578462	0.892023	0.70554	0.560565	0.612506	0.608823	0.305753
	7	110.735	269.281	142	0.52733	0.59577
		158.546						average	0.823816	0.556025	0.770093	0.584163	0.615574	0.683481	0.70694	0.489781
		87.291	170.127	113	0.66421			PTX/Mock	1	0.674939	1	0.758561	1	1.11031	1	0.692818
		82.836
	8	122.051	236.605	169	0.714271	0.673804
		114.554
		99.339	170.525	108	0.633338
		71.186
	9	83.2	143.874	85	0.590795	0.638306
		60.674
		85.349	139.979	96	0.685817
		54.63
	10	120.86	266.476	139	0.521623	0.560565
		145.616
		93.294	180.148	108	0.599507
		86.854
	Mock Ctrsh Ctr
	1	126.264	188.395	135	0.71658	0.710244
		62.131
		117.985	221.62	156	0.703908
		103.635
	2	126.476	187.566	160	0.853033	0.885562
		61.09
		106.102	165.561	152	0.918091
		59.459
	3	74.208	150.861	118	0.782177	0.950271
		76.653
		124.077	208.34	233	1.11836
		84.263
	4	122.732	226.129	143	0.632382	0.608049
		103.397
		83.028	157.611	92	0.583716
		74.583
	5	85.419	143.595	155	1.07943	1.12685
		58.176
		101.941	169.466	199	1.17428
		67.525
	6	106.141	231.162	162	0.700807	0.726265
		125.021
		81.396	167.615	126	0.751723
		86.219
	7	112.301	196.589	183	0.930876	0.878818
		84.288
		134.381	223.765	185	0.82676
		89.384
	8	84.806	175.55	120	0.683566	0.766219
		90.744
		90.963	180.239	153	0.848873
		89.276
	9	105.983	192.988	181	0.937882	0.916242
		87.005
		134.102	260.451	233	0.894602
		126.349
	10	99.384	203.892	121	0.593451	0.669635
		104.508
		83.539	190.395	142	0.745818
		106.856
	Mock Prr7sh 329 495
	1	99.861	213.499	139	0.651057	0.716662
		113.638
		119.547	236.492	185	0.782267
		116.945
	2	109.478	228.682	185	0.808984	0.739898
		119.204
		123.388	204.23	137	0.670812
		80.842
	3	89.762	197.843	165	0.833995	0.798307
		108.081
		55.859	125.882	96	0.762619
		70.023
	4	86.716	152.215	114	0.748941	0.739939
		65.499
		82.962	155.964	114	0.730938
		73.002
	5	135.682	219.072	99	0.451906	0.517797
		83.39
		80.612	162.758	95	0.583689
		82.146
	6	116.979	196.923	171	0.86836	0.890557
		79.944
		119.103	205.97	188	0.912754
		86.867
	7	133.896	240.833	184	0.764015	0.730403
		106.937
		68.868	143.515	100	0.696791
		74.647
	8	105.409	221.747	143	0.644879	0.671664
		116.338
		108.206	188.99	132	0.69845
		80.784
	9	106.226	196.919	121	0.614466	0.655349
		90.693
		112.305	234.117	163	0.696233
		121.812
	10	89.811	195.342	117	0.59895	0.608823
		105.531
		132.2	237.596	147	0.618697
		105.396
	Mock Prr7sh Ctr
	1	90.835	183.333	137	0.747274	0.760772
		92.498
		102.328	182.107	141	0.77427
		79.779
	2	93.437	150.796	114	0.755988	0.778393
		57.359
		100.949	214.786	172	0.800797
		113.837
	3	75.199	135.071	114	0.844001	0.853294
		59.872
		102.475	172.736	149	0.862588
		70.261
	4	137.833	167.137	140	0.837636	0.841591
		29.304
		97.743	182.131	154	0.845545
		84.388
	5	72.135	149.534	123	0.822555	0.726201
		77.399
		92.823	200.049	126	0.629846
		107.226
	6	67.778	125.376	98	0.781649	0.737385
		57.598
		73.689	148.603	103	0.693122
		74.914
	7	114.206	183.629	146	0.795081	0.794719
		69.423
		101.224	188.832	150	0.794357
		87.608
	8	73.358	126.476	86	0.679971	0.682048
		53.118
		87.232	157.866	108	0.684125
		70.634
	9	93.718	168.623	110	0.652343	0.634502
		74.905
		89.366	132.974	82	0.616662
		43.608
	10	99.205	194.616	166	0.852962	0.892023
		95.411
		129.477	243.802	227	0.931083
		114.325
	PTX Ctrsh 329 495
	1	137.299	221.383	126	0.569149	0.579456
		84.084
		67.729	144.126	85	0.589762
		76.397
	2	109.153	208.923	153	0.732327	0.711981
		99.77
		126.498	190.852	132	0.691635
		64.354
	3	137.454	253.301	190	0.750096	0.690615
		115.847
		85.362	144.185	91	0.631134
		58.823
	4	92.621	173.2	130	0.750577	0.755725
		80.579
		129.397	226.056	172	0.760873
		96.659
	5	102.502	231.717	189	0.81565	0.730379
		129.215
		79.606	179.815	116	0.645107
		100.209
	6	80.476	189.853	141	0.74268	0.829568
		109.377
		69.573	150.58	138	0.916456
		81.007
	7	119.045	270.297	183	0.677033	0.686009
		151.252
		115.632	218.71	152	0.694984
		103.078
	8	91.625	187.042	95	0.507907	0.55305
		95.417
		132.517	208.963	125	0.598192
		76.446
	9	79.392	146.184	106	0.725114	0.68552
		66.792
		115.734	218.291	141	0.645927
		102.557
	10	82.826	168.825	115	0.681179	0.612506
		85.999
		138.087	250.077	136	0.543832
		111.99
	PTX Ctrsh Ctr
	1	129.402	256.197	150	0.585487	0.607872
		126.795
		50.204	138.039	87	0.630257
		87.835
	2	161.992	250.153	117	0.467714	0.478191
		88.161
		130.73	223.055	109	0.488669
		92.325
	3	106.112	199.659	123	0.61605	0.596585
		93.547
		112.225	204.464	118	0.577119
		92.239
	4	93.56	191.712	92	0.479886	0.498763
		98.152
		88.988	148.752	77	0.51764
		59.764
	5	56.593	143.909	73	0.507265	0.492377
		87.316
		116.61	205.24	98	0.47749
		88.63
	6	115.878	206.599	110	0.532432	0.501507
		90.721
		114.624	206.128	97	0.470581
		91.504
	7	118.066	263.862	154	0.583638	0.619648
		145.796
		150.371	256.231	168	0.655658
		105.86
	8	76.342	169.439	93	0.54887	0.629839
		93.097
		57.836	111.141	79	0.710809
		53.305
	9	144.004	238.993	131	0.548133	0.557003
		94.989
		90.965	167.882	95	0.565874
		76.917
	10	120.299	208.571	113	0.541782	0.578462
		88.272
		93.847	167.441	103	0.615142
		73.594
	PTX Prr7sh 329 495
	1	80.033	191.117	106	0.554634	0.608351
		111.084
		128.657	237.136	157	0.662067
		108.479
	2	114.89	203.388	121	0.594922	0.591147
		88.498
		61.957	143.01	84	0.587372
		81.053
	3	103.064	196.454	99	0.503935	0.473422
		93.39
		83.868	187.397	83	0.44291
		103.529
	4	73.522	153.993	69	0.448072	0.419804
		80.471
		80.291	160.905	63	0.391535
		80.614
	5	97.461	159.53	83	0.520278	0.517305
		62.069
		98.055	173.04	89	0.514332
		74.985
	6	131.286	234.201	139	0.593507	0.547383
		102.915
		75.04	165.583	83	0.501259
		90.543
	7	140.939	206.509	95	0.460028	0.427509
		65.57
		102.589	164.561	65	0.39499
		61.972
	8	110.22	207.646	95	0.457509	0.510361
		97.426
		90.088	209.512	118	0.563214
		119.424
	9	83.776	172.641	77	0.446012	0.496771
		88.865
		112.064	166.201	91	0.54753
		54.137
	10	95.276	168.501	57	0.338277	0.305753
		73.225
		100.047	182.996	50	0.27323
		82.949
	PTX Prr7sh Ctr
	1	102.137	220.66	111	0.503036	0.528749
		118.523
		92.523	167.73	93	0.554463
		75.207
	2	123.511	174.8	95	0.543478	0.575359
		51.289
		94.233	179.501	109	0.607239
		85.268
	3	89.991	145.332	73	0.502298	0.53289
		55.341
		107.828	165.045	93	0.563483
		57.217
	4	91.011	163.509	87	0.532081	0.554002
		72.498
		89.552	178.843	103	0.575924
		89.291
	5	121.366	197.202	93	0.471598	0.467609
		75.836
		111.55	198.438	92	0.463621
		86.888
	6	153.415	234.388	143	0.610099	0.578801
		80.973
		83.64	195.433	107	0.547502
		111.793
	7	143.821	243.341	128	0.526011	0.523727
		99.52
		76.639	197.529	103	0.521442
		120.89
	8	98.481	187.071	79	0.4223	0.548409
		88.59
		88.869	164.562	111	0.674518
		75.693
	9	177.455	238.85	208	0.870839	0.826539
		61.395
		128.806	291.471	228	0.782239
		162.665
	10	103.837	193.511	134	0.692467	0.70554
		89.674
		117.464	183.687	132	0.718614
		66.223

## Sheet: 4C
	Ctr hairpin			495 hairpin
	Rep1	Rep2	Rep3	Rep1	Rep2	Rep3
	0.803552	0.972237	1.0687	0.526141	0.802101	0.855579
	21-10-20
	Mock 495hp
	1	148.064	279.624	156	0.557892	0.509043
		131.56
		74.123	160.802	74	0.460193
		86.679
	2	103.15	205.825	92	0.446982	0.431023
		102.675
		112.479	199.969	83	0.415064
		87.49
	3	113.18	202.356	86	0.424994	0.443738
		89.176
		90.882	185.953	86	0.462482
		95.071
	4	68.793	162.084	82	0.505911	0.547315
		93.291
		68.252	115.505	68	0.588719				Mock Ctrhp	PTX Ctrhp	Mock 495hp	PTX 495hp
		47.253							0.826793	0.610105	0.509043	0.747809
	5	74.434	147.974	56	0.378445	0.396779			0.621199	0.565478	0.431023	0.63883
		73.54							0.681885	0.395797	0.443738	0.644154
		77.965	161.402	67	0.415113				1.13343	0.57386	0.547315	0.400345
		83.437							0.643329	0.514784	0.396779	0.591714
	6	94.487	179.698	93	0.517535	0.490589			0.464134	0.533069	0.490589	0.490787
		85.211							0.763415	0.683253	0.599971	0.587257
		118.016	170.39	79	0.463642				1.11944	0.705454	0.536839	0.649569
		52.374							0.978343	0.704968	0.779971	0.822987
	7	59.657	106.476	69	0.648033	0.599971			0.803552	0.587419	0.526141	0.619272
		46.819									0.654769
		73.611	150.387	83	0.551909
		76.776
	8	82.629	187.987	106	0.563869	0.536839
		105.358
		73.547	162.806	83	0.509809
		89.259
	9	123.086	217.003	149	0.686626	0.779971
		93.917
		120.039	220.997	193	0.873315
		100.958
	Mock Ctrhp
	1	92.015	178.202	127	0.712674	0.826793
		86.187
		86.102	143.478	135	0.940911
		57.376
	2	173.544	259.188	152	0.586447	0.621199
		85.644
		99.63	169.22	111	0.655951
		69.59
	3	146.449	273.601	190	0.694442	0.681885
		127.152
		122.104	203.189	136	0.669328
		81.085
	4	109.844	165.649	187	1.12889	1.13343
		55.805
		73.681	128.298	146	1.13798
		54.617
	5	103.357	173.831	97	0.558013	0.643329
		70.474
		61.256	100.186	73	0.728645
		38.93
	6	81.986	135.92	57	0.419364	0.464134
		53.934
		94.417	178.816	91	0.508903
		84.399
	7	159.516	245.048	201	0.820247	0.763415
		85.532
		56.864	161.34	114	0.706582
		104.476
	8	104.642	174.179	191	1.09657	1.11944
		69.537
		90.093	153.2	175	1.1423
		63.107
	9	88.736	144.8	152	1.04972	0.978343
		56.064
		81.028	187.439	170	0.906962
		106.411
	PTX 495hp
	1	105.868	188.02	122	0.648867	0.747809
		82.152
		91.373	151.166	128	0.846751
		59.793
	2	81.799	170.351	108	0.633985	0.63883
		88.552
		86.468	191.09	123	0.643676
		104.622
	3	76.737	143.233	98	0.6842	0.644154
		66.496
		99.359	183.742	111	0.604108
		84.383
	4	111.959	195.238	70	0.358537	0.400345
		83.279
		95.991	189.979	84	0.442154
		93.988
	5	71.41	161.102	107	0.664175	0.591714
		89.692
		44.847	113.625	59	0.519252
		68.778
	6	118.183	200.763	82	0.408442	0.490787
		82.58
		86.05	157.032	90	0.573132
		70.982
	7	89.332	172.908	95	0.549425	0.587257
		83.576
		79.876	169.576	106	0.625088
		89.7
	8	94.661	122.332	87	0.711179	0.649569
		27.671
		88.337	153.072	90	0.587959
		64.735
	9	63.213	105.537	94	0.890683	0.822987
		42.324
		113.872	211.839	160	0.755291
		97.967
	PTX Ctrhp
	1	143.823	186.163	127	0.682198	0.610105
		42.34
		112.675	198.88	107	0.538013
		86.205
	2	107.641	167.471	102	0.609061	0.565478
		59.83
		77.658	168.616	88	0.521896
		90.958
	3	118.392	160.76	55	0.342125	0.395797
		42.368
		128.164	220.26	99	0.449469
		92.096
	4	104.486	191.03	99	0.518243	0.57386
		86.544
		58.762	112.792	71	0.629477
		54.03
	5	156.6	236.325	104	0.440072	0.514784
		79.725
		71.056	139.102	82	0.589495
		68.046
	6	76.79	176.706	81	0.458389	0.533069
		99.916
		88.547	126.697	77	0.607749
		38.15
	7	101.672	191.194	123	0.643326	0.683253
		89.522
		104.035	138.278	100	0.723181
		34.243
	8	85.515	146.572	102	0.695904	0.705454
		61.057
		118.456	212.586	152	0.715005
		94.13
	9	100.282	146.942	105	0.714568	0.704968
		46.66
		90.413	211.399	147	0.695368
		120.986
	211103 rep2
	495hp	Length			spine number/um				Ctrhp	495hp
	1	91.043	162.714	148	0.909571	0.93528			1.09654	0.93528
		71.671							1.02318	0.744137
		69.664	174.82	168	0.960988				1.24941	0.806941
		105.156							0.845905	0.68876
	2	110.815	193.022	164	0.849644	0.744137			1.01384	0.868271
		82.207							0.889417	0.786933
		109.661	192.6	123	0.638629				1.07385	0.695312
		82.939							0.816387	0.813448
	3	114.785	217.262	162	0.745644	0.806941			0.979684	0.783491
		102.477							1.07188	0.81891
		82.997	184.281	160	0.868239				0.785057	0.907151
		101.284							0.821688	0.776577
	4	113.977	234.201	168	0.717333	0.68876			0.972237	0.802101
		120.224								0.825005
		89.403	151.472	100	0.660188
		62.069
	5	102.661	165.168	156	0.944493	0.868271
		62.507
		67.329	142.668	113	0.792049
		75.339
	6	99.424	196.288	155	0.789656	0.786933
		96.864
		97.589	195.101	153	0.784209
		97.512
	7	126.048	202.941	155	0.763769	0.695312
		76.893
		96.613	156.336	98	0.626855
		59.723
	8	77.395	170.69	133	0.77919	0.813448
		93.295
		104.911	160.433	136	0.847706
		55.522
	9	139.115	268.821	183	0.68075	0.783491
		129.706
		86.781	192.952	171	0.886231
		106.171
	10	108.625	156.563	133	0.849498	0.81891
		47.938
		116.37	197.889	156	0.788321
		81.519
	11	121.177	194.612	158	0.811872	0.907151
		73.435
		76.355	171.583	172	1.00243
		95.228
	12	116.549	194.184	139	0.715816	0.776577
		77.635
		108.24	247.212	207	0.837338
		138.972
	Ctr
	1	85.189	203.118	233	1.14712	1.09654
		117.929
		83.037	112.814	118	1.04597
		29.777
	2	79.876	191.355	199	1.03995	1.02318
		111.479
		85.187	180.84	182	1.00641
		95.653
	3	101.847	167.414	216	1.29021	1.24941
		65.567
		160.744	251.529	304	1.20861
		90.785
	4	94.372	146.834	125	0.851301	0.845905
		52.462
		125.053	243.9	205	0.840508
		118.847
	5	92.377	175.837	168	0.95543	1.01384
		83.46
		71.208	121.24	130	1.07225
		50.032
	6	124.469	223.118	214	0.959134	0.889417
		98.649
		109.275	208.613	171	0.8197
		99.338
	7	130.095	167.135	183	1.09492	1.07385
		37.04
		113.547	183.323	193	1.05279
		69.776
	8	107.479	209.535	176	0.839955	0.816387
		102.056
		104.634	165.233	131	0.79282
		60.599
	9	111.81	186.209	174	0.934434	0.979684
		74.399
		134.981	226.356	232	1.02493
		91.375
	10	125.562	227.595	263	1.15556	1.07188
		102.033
		121.784	209.473	207	0.988194
		87.689
	11	105.068	220.974	161	0.728593	0.785057
		115.906
		90.051	183.002	154	0.841521
		92.951
	12	115.844	270.967	213	0.786074	0.821688
		155.123
		153.042	220.459	189	0.857302
		67.417
	2021-10-11
	495hp					Average
	1	125.044	185.108	132	0.713097	0.746149				Ctrhp	495hp
		60.064								1.01194	0.746149
		131.156	192.505	150	0.779201					0.987145	1.01536
		61.349								1.24296	1.03161
	2	99.333	216.898	228	1.05119	1.01536				0.843663	0.966159
		117.565								1.11789	1.02989
		90.784	163.342	160	0.97954					1.14575	0.619257
		72.558								0.95462	0.674808
	3	100.338	173.428	168	0.968702	1.03161				1.12989	0.877732
		73.09								1.18446	0.739247
		85.312	169.023	185	1.09453					1.0687	0.855579
		83.711									0.800579
	4	94.125	163.292	164	1.00434	0.966159
		69.167
		75.219	147.632	137	0.927983
		72.413
	5	140.237	206.473	201	0.973493	1.02989
		66.236
		114.808	216.335	235	1.08628
		101.527
	6	130.119	260.309	161	0.618496	0.619257
		130.19												COMPILED	Ctrhp	495hp
		123.836	238.703	148	0.620017									211110	1.0687	0.855579	0.800579
		114.867												211103 rep2	0.972237	0.802101	0.825005
	7	157.789	226.386	151	0.667002	0.674808								201021	0.803552	0.526141	0.654769
		68.597
		51.292	140.636	96	0.682613
		89.344
	8	99.424	147.313	122	0.828169	0.877732
		47.889
		123.434	215.681	200	0.927295
		92.247
	9	121.388	233.441	190	0.81391	0.739247
		112.053
		92.527	233.229	155	0.664583
		140.702
	Ctr
	1	80.532	147.407	167	1.13292	1.01194
		66.875
		120.637	212.132	189	0.890955
		91.495
	2	168.98	213.568	194	0.908376	0.987145
		44.588
		157.439	259.871	277	1.06591
		102.432
	3	112.823	231.113	285	1.23316	1.24296
		118.29
		135.921	302.535	379	1.25275
		166.614
	4	110.107	196.058	144	0.734477	0.843663
		85.951
		103.51	136.433	130	0.952849
		32.923
	5	128.373	293.358	310	1.05673	1.11789
		164.985
		87.222	153.513	181	1.17905
		66.291
	6	106.705	206.226	241	1.16862	1.14575
		99.521
		104.644	179.895	202	1.12288
		75.251
	7	114.852	192.151	196	1.02003	0.95462
		77.299
		74.831	116.958	104	0.889208
		42.127
	8	111.317	229.898	282	1.22663	1.12989
		118.581
		88.45	232.3	240	1.03315
		143.85
	9	99.564	267.986	287	1.07095	1.18446
		168.422
		144.084	181.823	236	1.29797
		37.739

## Sheet: 4D
	Ctr hairpin			329 hairpin
	Rep1	Rep2	Rep3	Rep1	Rep2	Rep3
	0.941895	0.803813	1.01892	0.71757	0.590596	0.663803
	30-8-20
									30-8-20			23-11-20			30-11-20
	329hp	Length	Summed length	spines/um		Average			Ctrhp	329hp		Ctrhp	329hp		Ctrhp	329hp
	1	95.223	177.536	149	0.839266	0.831359			0.890957	0.831359		0.744579	0.619852		1.14285	0.531568
		82.313							1.21426	0.768043		1.02386	0.57415		1.31391	0.737133
		83.467	163.944	135	0.823452				0.912262	0.815994		0.645346	0.543786		0.825424	0.788446
		80.477							0.840365	0.646989		0.962691	0.624559		1.05908	0.525977
	2	60.874	93.018	84	0.903051	0.768043			0.604158	0.622642		0.668403	0.68891		0.952208	0.579754
		32.144							0.930905	0.774941		0.82765	0.543611		0.99167	0.984662
		53.401	143.752	91	0.633035				0.891336	0.612251		0.75416	0.539302		1.02359	0.49908
		90.351							1.02604	0.668339					0.842598
	3	170.004	229.116	170	0.741982	0.815994			1.16677
		59.112							0.941895	0.71757		0.803813	0.590596		1.01892	0.663803
		80.408	188.763	168	0.890005				1	0.761836		1	0.734743		1	0.651479
		108.355							Compiled
	4	80.363	159.135	87	0.546706	0.646989
		78.772
		104.277	206.083	154	0.747272
		101.806
	6	75.021	124.596	82	0.658127	0.622642
		49.575
		111.112	221.406	130	0.587157
		110.294
	7	102.492	171.777	126	0.733509	0.774941
		69.285
		74.743	122.493	100	0.816373
		47.75
	8	96.372	156.098	96	0.614998	0.612251
		59.726
		115.057	205.085	125	0.609503
		90.028
	9	87.799	139.581	99	0.709266	0.668339
		51.782
		87.811	175.323	110	0.627413
		87.512
	Ctr
	1	156.247	277.958	246	0.885026	0.890957
		121.711
		53.912	159.44	143	0.896889
		105.528
	2	121.045	211.742	262	1.23735	1.21426
		90.697
		88.4	126.766	151	1.19117
		38.366
	3	186.246	247.429	210	0.848728	0.912262
		61.183
		92.4	141.423	138	0.975796
		49.023
	5	119.968	219.645	179	0.814951	0.840365
		99.677
		108.928	196.355	170	0.865779
		87.427
	6	119.757	207.303	139	0.670516	0.604158
		87.546
		146.769	238.007	128	0.537799
		91.238
	7	83.205	170.71	165	0.966551	0.930905
		87.505
		96.35	217.814	195	0.895259
		121.464
	8	95.673	192.143	160	0.832713	0.891336
		96.47
		99.131	228.431	217	0.949959
		129.3
	9	89.526	173.387	167	0.963163	1.02604
		83.861
		121.706	240.608	262	1.08891
		118.902
	10	81.461	144.584	170	1.17579	1.16677
		63.123
		114.885	184.841	214	1.15775
		69.956
	23-11-20
	329hp
	1	93.838	125.657	83	0.660528	0.619852
		31.819
		87.219	198.558	115	0.579176
		111.339
	2	89.529	171.784	80	0.465701	0.57415
		82.255
		88.32	128.919	88	0.682599
		40.599
	3	82.225	145.306	77	0.529916	0.543786
		63.081
		76.571	129.112	72	0.557655
		52.541
	4	95.877	180.79	120	0.663754	0.624559
		84.913
		113.823	186.209	109	0.585364
		72.386
	5	72.293	173.299	122	0.703986	0.68891
		101.006
		75.923	167.697	113	0.673834
		91.774
	6	165.75	262.574	142	0.5408	0.543611
		96.824
		94.505	142.747	78	0.546421
		48.242
	7	87.959	157.681	86	0.545405	0.539302
		69.722
		114.484	155.664	83	0.5332
		41.18
	Ctr
	1	82.499	151.509	112	0.73923	0.744579
		69.01
		78.465	153.348	115	0.749928
		74.883
	2	71.958	125.594	144	1.14655	1.02386
		53.636
		78.689	148.696	134	0.901167
		70.007
	3	93.505	170.938	119	0.696159	0.645346
		77.433
		97.462	211.931	126	0.594533
		114.469
	4	91.136	146.443	150	1.02429	0.962691
		55.307
		106.722	169.794	153	0.901092
		63.072
	5	76.259	136.43	99	0.725647	0.668403
		60.171
		99.315	166.896	102	0.611159
		67.581
	6	98.411	154.367	122	0.790324	0.82765
		55.956
		93.412	216.191	187	0.864976
		122.779
	7	87.734	179.266	137	0.764227	0.75416
		91.532
		96.552	202.932	151	0.744092
		106.38
	30-11-20
	329hp
	1	69.175	152.457	77	0.50506	0.531568
		83.282
		131.769	234.735	131	0.558076
		102.966
	2	150.503	252.939	176	0.69582	0.737133
		102.436
		108.171	141.307	110	0.778447
		33.136
	3	91.943	175.971	122	0.693296	0.788446
		84.028
		89.65	160.707	142	0.883596
		71.057
	4	97.066	195.464	100	0.511603	0.525977
		98.398
		68.77	142.5	77	0.540351
		73.73
	5	78.022	114.768	78	0.679632	0.579754
		36.746
		99.948	175.045	84	0.479877
		75.097
	6	124.466	211.374	212	1.00296	0.984662
		86.908
		70.043	129.351	125	0.966363
		59.308
	7	127.39	286.4	147	0.513268	0.49908
		159.01
		91.601	191.795	93	0.484893
		100.194
	Ctr
	1	145.202	210.976	254	1.20393	1.14285
		65.774
		89.833	183.034	198	1.08177
		93.201
	2	78.629	127.315	210	1.64945	1.31391
		48.686
		90.166	165.581	162	0.978373
		75.415
	3	44.292	137.685	113	0.820714	0.825424
		93.393
		111.544	202.377	168	0.830134
		90.833
	4	79.762	157.56	167	1.05991	1.05908
		77.798
		83.6	183.322	194	1.05825
		99.722
	5	137.897	185.674	188	1.01253	0.952208
		47.777
		76.251	161.455	144	0.891889
		85.204
	6	116.957	174.195	178	1.02184	0.99167
		57.238
		147.806	248.571	239	0.961496
		100.765
	7	150.644	192.781	210	1.08932	1.02359
		42.137
		79.221	150.335	144	0.957861
		71.114
	8	57.487	111.018	96	0.864725	0.842598
		53.531
		38.335	115.787	95	0.820472
		77.452
